1 **Title**

2 CSDE1 is a Post-Transcriptional Regulator of the LDL Receptor

3

4 **Authors**

5 Geoffrey A. Smith, MD PhD<sup>†,1,2</sup>; Arun Padmanabhan, MD PhD<sup>†,3,4,5</sup>; Bryan H. Lau, BS<sup>6</sup>; Akhil  
6 Pampana, MS<sup>7,8</sup>; Li Li, BS<sup>9</sup>; Y. Clara Lee, BA<sup>5</sup>; Angelo Pelonero, MS<sup>5</sup>; Tomohiro Nishino, MD  
7 PhD<sup>5</sup>; Nandhini Sadagopan, MS<sup>3,4,5</sup>; Rajan Jain, MD<sup>9,10</sup>; Pradeep Natarajan, MD<sup>7,8,11</sup>; Roland S.  
8 Wu, MD<sup>3,4,6,12</sup>; Brian L. Black, PhD<sup>6</sup>; Deepak Srivastava, MD<sup>5,13,14</sup>; Kevan M. Shokat, PhD<sup>1,15</sup>;  
9 John S. Chorba, MD<sup>\*,4,16</sup>

10

11 <sup>†</sup>Drs. Smith and Padmanabhan contributed equally.

12 \*Corresponding Author

13

14 **Author Affiliations**

15 <sup>1</sup>Department of Cellular and Molecular Pharmacology, University of California, San Francisco  
16 CA

17 <sup>2</sup>Present Affiliation: Boston Children's Hospital, Boston MA

18 <sup>3</sup>Division of Cardiology, UCSF Health, San Francisco CA

19 <sup>4</sup>Department of Medicine, University of California, San Francisco CA

20 <sup>5</sup>Gladstone Institute of Cardiovascular Disease, San Francisco CA

21 <sup>6</sup>Cardiovascular Research Institute, University of California San Francisco

22 <sup>7</sup>Cardiovascular Research Center, Massachusetts General Hospital, Boston MA

23 <sup>8</sup>Program in Medical and Population Genetics, Broad Institute of Harvard and MIT, Cambridge  
24 MA

25 <sup>9</sup>Department of Medicine and Penn Cardiovascular Institute, University of Pennsylvania,  
26 Philadelphia PA

27 <sup>10</sup>Department of Cell and Developmental Biology, Institute of Regenerative Medicine, and Penn  
28 Epigenetics Institute, University of Pennsylvania, Philadelphia PA

29 <sup>11</sup>Department of Medicine, Harvard Medical School, Boston MA

30 <sup>12</sup>Present Affiliation: Amgen, South San Francisco CA

31 <sup>13</sup>Departments of Pediatrics, and Biochemistry and Biophysics, University of California, San  
32 Francisco CA

33 <sup>14</sup>Roddenberry Center for Stem Cell Biology and Medicine at Gladstone, San Francisco CA

34 <sup>15</sup>Howard Hughes Medical Institute, University of California, San Francisco CA

35 <sup>16</sup>Division of Cardiology, Zuckerberg San Francisco General Hospital, San Francisco CA

36

37 **Corresponding Author**

38 John S. Chorba MD

39 600 16<sup>th</sup> St

40 Genentech Hall N514, MC2280

41 San Francisco CA 94143

42 phone: 415-601-7361

43 email: john.chorba@ucsf.edu

44

45 **Abstract**

46 The low-density lipoprotein receptor (LDLR) controls cellular delivery of cholesterol and clears  
47 LDL from the bloodstream, protecting against atherosclerotic heart disease, the leading cause  
48 of death in the United States. We therefore sought to identify regulators of the LDLR beyond the  
49 targets of current clinical therapies and known causes of familial hypercholesterolemia. We  
50 show that Cold Shock Domain-Containing Protein E1 (CSDE1) enhances hepatic *LDLR* mRNA  
51 decay via its 3' untranslated region to regulate atherogenic lipoproteins *in vivo*. Using parallel  
52 phenotypic genome-wide CRISPR interference screens, we found 40 specific regulators of the  
53 LDLR left unidentified by observational human genetics. Among these, we show that CSDE1  
54 regulates the LDLR at least as strongly as the mechanistically distinct pathways exploited by the  
55 best available clinical therapies: statins and PCSK9 inhibitors. Additionally, we show that  
56 hepatic gene silencing of *Csde1* treats diet-induced dyslipidemia in mice better than that of  
57 *Pcsk9*. Our results reveal the therapeutic potential of manipulating a newly identified key factor  
58 in the post-transcriptional regulation of the *LDLR* mRNA for the prevention of cardiovascular  
59 disease. We anticipate that our approach of modelling a clinically relevant phenotype in a  
60 forward genetic screen, followed by mechanistic pharmacologic dissection and *in vivo*  
61 validation, will serve as a generalizable template for the identification of therapeutic targets in  
62 other human disease states.

63

64 **Keywords**

65 Atherosclerosis, cholesterol metabolism, CRISPR interference, CSDE1, genome-wide CRISPR  
66 screen, post-transcriptional regulation, LDL receptor, mRNA decay, pharmacogenetics,  
67 transferrin receptor

68

69 **One Sentence Summary**

70 A genome-wide CRISPR screen identifies CSDE1 as a key regulator of hepatic *LDLR* mRNA  
71 decay *in vivo*, making it a promising target for heart disease.

72

73 **Graphical Abstract**  
74

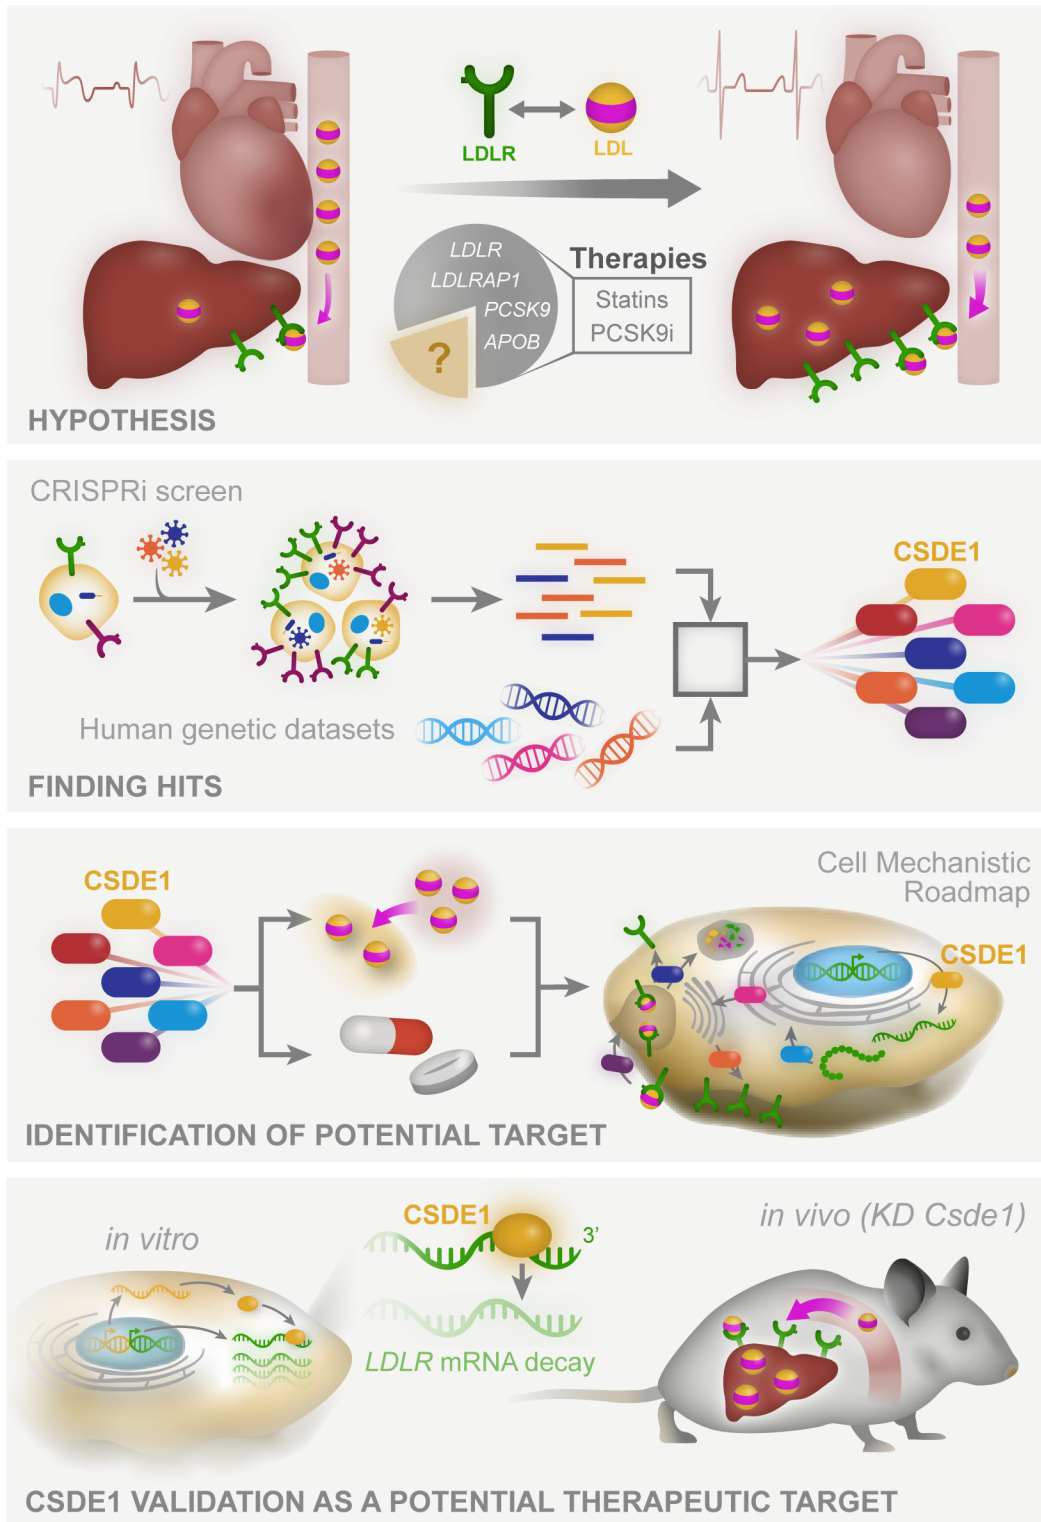

75  
76  
77

## 78 Introduction

79 The low-density lipoprotein receptor (LDLR) delivers cholesterol from low-density lipoprotein  
80 (LDL) to cells to maintain membrane homeostasis (1). By clearing atherogenic LDL from the  
81 bloodstream, the hepatic LDLR protects against atherosclerotic heart disease (2, 3). Despite  
82 successful therapies that upregulate the hepatic LDLR and reduce heart attacks (4),  
83 cardiovascular disease remains the leading cause of death in Western countries (5). Lowering  
84 LDL beyond the levels achieved by HMG-CoA reductase inhibitors (statins) improves clinical  
85 outcomes without adverse effects (6, 7). Though there is a theoretical level at which LDL could  
86 get too low (8), this has yet to be discovered in large randomized trials (9, 10). Whether other  
87 LDLR regulatory mechanisms could be leveraged to further treat heart disease remains  
88 unknown.

89  
90 The genetics of familial hypercholesterolemia (FH), which manifests as an isolated elevation in  
91 serum LDL, underlies the clinical success of LDLR upregulation by statins and PCSK9  
92 inhibitors. Estimates suggest that 20-40% of FH phenotypes remain unexplained outside of the  
93 four major causes: *LDLR*, *APOB*, *PCSK9*, and *LDLRAP1* (11, 12). This implies that additional  
94 regulators of the LDLR exist. Advances in forward genetics (13–15) can now enable searches  
95 for tissue and disease-specific effects across the entire genome that may elude the sporadic  
96 natural variants found in observational studies, which themselves require compatibility  
97 throughout the entire lifespan and in all cell types. Moreover, hepatic delivery of gene silencing  
98 agents is effective in the clinic (16), providing a therapeutic modality against hits whose  
99 phenotypes are driven by expression in the liver. We therefore employed a genome-wide  
100 CRISPR interference screen for factors involved in hepatic LDLR regulation, both to understand  
101 the biology of this important receptor and to uncover potential therapeutic targets in  
102 cardiovascular disease.

## 103 Results

### 104 *A Genome-Wide CRISPR Interference Screen for LDL Receptor Regulation*

105 We engineered the HepG2 cell line, which models the regulation of the LDLR (17), to  
106 constitutively express a dCas9-KRAB fusion protein, enabling the knockdown of any given gene  
107 with an appropriate sgRNA (Fig. 1A) (13, 14, 18). Because statins (19, 20) and PCSK9  
108 inhibitors (21–23) increase cell surface LDLR, we scored surface LDLR levels. To focus on  
109 factors that preferentially affect the LDLR over other receptors, we performed a parallel screen  
110 for regulators of the transferrin receptor (TFR). This critical player in iron metabolism shares a  
111 clathrin-mediated intake mechanism, but is otherwise orthogonally regulated from the LDLR (24,  
112 25). Prior to our screen, we confirmed both dCas9-KRAB activity and an appropriate dynamic  
113 range for both LDLR and TFR regulation by transduction with sgRNAs expected to alter  
114 receptor levels in either direction (Fig. S1) (26, 27).

115  
116  
117 We next performed our pooled screens in parallel by transducing a library encoding sgRNAs  
118 with 5-fold coverage of the entire protein-coding human genome (14). We then selected the  
119 cells at the upper and lower third of receptor abundance by FACS and quantified the sgRNAs  
120 for each population via deep sequencing (Fig. S2, Tables S1-S4). We compared the degree of  
121 enrichment of LDLR or TFR surface levels in the high abundance to the low abundance cells  
122 (defined as  $\rho$ , Fig. 1B). We also compared the high and low receptor abundance cells to the  
123 unsorted population (defined as  $\tau$  or  $\gamma$ , respectively) and included these results in our final hit  
124 count. This resulted in 130 total hits for the LDLR and 186 hits for the TFR (Tables S5-S6). We  
125 hypothesized that hits with shared phenotypes would likely have global effects on surface  
126 receptors, leaving us with 117 hits specific for LDLR regulation (Fig. 1C, Table 1). Gene  
127 ontology (GO) analysis (28) revealed a 15-fold enrichment for cholesterol metabolism as a  
128 biologic process (11 total hits,  $p = 5.7 \times 10^{-10}$ ), providing confidence that we recapitulated our



129 target biology. The hits also included 48 members of potentially druggable protein classes,  
130 including 29 with proposed enzymatic activity, and 22 hits were unclassified in GO databases  
131 (Fig. S3A).

132

### 133 *Cross-referencing Human Genetic Datasets Identifies LDLR Regulators in vivo*

134 We next compared genes associated with serum LDL cholesterol (LDL-C) from published  
135 genome-wide association studies (GWAS) (29–31) to our list of hits. Intriguingly, only 13 of  
136 these genes overlapped with our results (Fig. 1D), even when we relaxed our threshold for hit  
137 selection. To improve power for multiple hypothesis testing across the entire genome, we turned  
138 to 390,375 UK Biobank participants with genome-wide genotypes and known plasma lipids  
139 (Table S7) to search for variants associated with LDL-C amongst only our hits (32). We filtered  
140 to nonsynonymous protein coding variants in these hits by a threshold minor allele frequency  
141 (>0.001) and minimum statistical significance (Table 2). For *BCAM*, we found both an  
142 association between higher LDL-C and a nonsense variant, along with bidirectional associations  
143 between LDL-C and missense variants, suggesting that this pathway may be tunable. We also  
144 found associations between elevated LDL-C and variants in *MSMO1*, *C6orf132*, *HNF4A*, and  
145 *TIMELESS*, suggesting that these hits may be functional in the human and warrant further  
146 evaluation. The results also suggest that the accessible “genomic space” of the CRISPRi and  
147 GWAS strategies is only partially overlapping.

148

### 149 *Regulators of Surface LDL Receptor Abundance Affect Functional Uptake of LDL*

150 To validate our screen results, we generated CRISPRi HepG2 cells harboring either of the two  
151 top-scoring sgRNAs for 77 of our hits as well as established controls. We preferentially tested  
152 hits with an increase in surface LDLR upon inhibition, as well as those with potentially druggable  
153 functions or lacking associated GO terms. Since surface receptor levels might not necessarily  
154 correlate to increased function, we evaluated both LDLR and TFR surface phenotypes  
155 alongside a functional assay of LDL uptake (33). Lastly, as knockdowns could also cause  
156 growth phenotypes, we assayed the number of cells surviving to FACS analysis as a proxy for  
157 viability.

158

159 We recapitulated the phenotypes for receptor abundance for at least one of the guides in the  
160 majority of the hits (55 genes, 71% of those tested, Table S8). Moreover, for 40 of these genes,  
161 both sgRNAs independently validated, suggesting against an off-target effect. We visualized  
162 these hits based on their effects, at single cell resolution, on LDLR and TFR levels, the  
163 LDLR/TFR ratio, functional LDL uptake and number of cells surviving to analysis (Figs. 2, S3B).  
164 Notably, most knockdowns had independently validated effects on LDLR abundance and LDL  
165 uptake of similar or greater magnitude than our *HMGCR* or *PCSK9* controls.

166

167 Knockdown of hits expected to alter cellular cholesterol balance or transcriptionally regulate the  
168 LDLR showed directionally consistent effects between LDLR abundance and function (Fig. 2).  
169 For genes in the enzymatic pathway of cholesterol metabolism (34) (*HMGCS1* and *MSMO1*),  
170 this is consistent with activation of SREBP2-mediated *LDLR* transcription. For genes encoding  
171 certain transcription factors (*HNF1A* (35), *HNF4A* (36), *ONECUT1* (37), and *ZEB1* (38)), this is  
172 consistent with an effect on *LDLR* transcription itself. Knockdowns of *SLC25A27*, which  
173 encodes a mitochondrial uncoupling protein (39), and *ABCA4*, encoding a known lipid  
174 transporter (40), both exhibited reductions in LDLR abundance and function (Fig. 2). These  
175 genes could plausibly induce a negative lipid balance, increasing LDL uptake via both LDLR  
176 dependent and independent mechanisms.

177

178 Targeting of hits that either affect multiple transcriptional pathways or regulate endocytosis  
179 showed opposite effects on LDLR abundance and function. Knockdown of *TRIB1*, a GWAS hit

180 (29) encoding a pseudokinase that regulates the COP1 E3 ligase (41, 42) and affects multiple  
181 transcription factors (43), showed this phenotype. In the mouse, *TRIB1* overexpression lowers  
182 serum cholesterol, while the knockout has the opposite effect (44, 45), consistent with our  
183 results. Knockdown of *AP2M1*, a TFR screen hit that encodes an adaptor protein required for  
184 endocytosis (46), was similar, consistent with an accumulation of non-functional receptors at the  
185 cell surface. This phenotype, though specific to the LDLR, was also seen with knockdown of  
186 *BCAM*, which encodes a membrane cell adhesion molecule (47) identified by GWAS (31), and  
187 *TMEM217*, which encodes an uncharacterized transmembrane protein (Figs. 2, S4). This  
188 suggests that these proteins could have a similar endocytosis adaptor function specific for the  
189 LDLR, akin to *LDLRAP1* (48), in which mutations cause a recessive form of FH.

#### 190 191 *Pharmacologic Inhibition of Clinically Relevant Pathways Provides Mechanistic Insight into* 192 *Putative LDLR Regulators*

193 We next turned to pharmacologic approaches to perturb specific pathways of LDLR regulation.  
194 We hypothesized that hits might alter cholesterol metabolism, LDLR recycling, or a yet  
195 unspecified pathway. By combining CRISPRi knockdown with either a statin, to inhibit  
196 endogenous cholesterol biosynthesis (49, 50), or a PCSK9 inhibitor, to arrest LDLR lysosomal  
197 degradation (23), and assessing the combined effect, we inferred mechanistic information about  
198 the target gene. Furthermore, we hypothesized that either additive or potentiating effects  
199 between a clinically validated therapy and a hit gene might suggest promising therapeutic  
200 targets.

201  
202 We evaluated the receptor abundance and function phenotypes for 29 of our validated hits in  
203 the presence or absence of a statin (51) or PF-846, a selective inhibitor of PCSK9 translation  
204 (52, 53) (Fig. 3, Table S9). We calculated a synergy score by subtracting the differential effects  
205 of CRISPRi knockdown, compared to the control, in the presence of compound from that with  
206 the DMSO vehicle. A more positive value indicated synergy, and a more negative value  
207 indicated antagonism.

208  
209 Upon knockdown, regulators of cholesterol biosynthesis (*SREBF2*, *HMGCR*, *HMGCS1*,  
210 *MSMO1*, and *PMVK*) showed antagonism with the statin, but mild synergy with PCSK9  
211 inhibition (Fig. 3). This is consistent with the SREBP2-mediated *PCSK9* transcription that  
212 underlies the clinical synergy between statins and PCSK9 inhibitors. The synergy phenotypes  
213 for knockdown of *MRPL16*, which encodes a structural component of the mitochondrial  
214 ribosome (54), mirrored these cholesterol biosynthetic genes (Fig. 3), suggesting that MRP-L16  
215 may play a role in the mitochondrial generation of metabolic precursors to sterol biogenesis. In  
216 contrast, *C6orf132* knockdown showed the opposite phenotype: mild synergy with a statin, and  
217 mild antagonism with PF-846 (Fig. 3). Given that *C6orf132* localizes to the Golgi (55), this  
218 suggests it may function by facilitating LDLR delivery to the cell surface, prior to any interaction  
219 with extracellular PCSK9. For some transcription factors, the synergy phenotypes can point to  
220 their downstream targets. For example, synergy of *HNF1A* knockdown with a statin (Fig. 3) is  
221 consistent with disruption of HNF1- $\alpha$ -mediated *PCSK9* transcription (56).

#### 222 223 *CSDE1 Regulates the Stability of LDLR mRNA*

224 One of our strongest hits, *CSDE1*, also known as upstream of N-ras (UNR), encodes an RNA  
225 binding protein with varied regulatory functions (57–59), including mRNA decay (60). As the  
226 *LDLR* 3' UTR consists of adenylate-uridylate (AU)-rich elements (AREs) implicated in mRNA  
227 stability (61), we hypothesized that *CSDE1* could mediate the degradation of the *LDLR*  
228 transcript, thereby explaining its observed receptor abundance, function, and synergy  
229 phenotypes.

230

231 In the setting of *CSDE1* knockdown, we observed progressively higher LDLR abundance with  
232 sterol depletion and a concomitant statin (Figs. 4A, S5A-C). This suggests the mechanism of  
233 *CSDE1* disruption is at least additive with SREBP2-mediated *LDLR* transcription and statin  
234 therapy. We also observed that overexpression of isoform 1 of *CSDE1*, but not isoforms 2  
235 through 4, reduced surface LDLR in HepG2 cells (Figs. 4B, S6A-D). Overexpression of all four  
236 isoforms of *CSDE1* downregulated LDLR levels in the *CSDE1* knockdown cells, though isoform  
237 1 showed the strongest effect (Fig. S6E-I). The opposing directional effects of *CSDE1*  
238 knockdown and overexpression suggest that, under physiologic expression conditions, isoform  
239 1 of *CSDE1* is a rate-limiting regulator of the LDLR.

240  
241 Consistent with our mechanistic hypothesis, we noted over a 2-fold increase in steady-state  
242 mRNA levels of *LDLR* (Fig. 4C), as well as depleted *CSDE1* (Figs. 4C, S7), in the *CSDE1*  
243 knockdown cells. Among control mRNA targets, we also observed significant increases in  
244 *MYLIP* and *KHSRP* mRNA. These gene products downregulate the LDLR (26, 62), which is the  
245 opposite of our observed phenotype, suggesting that the direct effect of *CSDE1* knockdown on  
246 the *LDLR* mRNA predominates. To specifically evaluate transcriptional decay, we treated cells  
247 with actinomycin D and measured *LDLR* transcript levels over time. We observed significantly  
248 higher *LDLR* mRNA in the *CSDE1* knockdown cells at all subsequent timepoints (Fig. 4D). The  
249 mRNA half-life, modeled by a single-phase decay equation, was nearly 1.5-fold longer for the  
250 *CSDE1* knockdowns compared to controls ( $p = 0.0021$ , Fig. 4D). Notably, *CSDE1* knockdown  
251 had no significant effect on *HMGCR*, *SREBF2*, *PCSK9*, or *TFRC* mRNA levels over time (Fig.  
252 S8), suggesting that the effect on mRNA stability was isolated to *LDLR* among our tested  
253 transcripts.

254  
255 To probe the relationship of *CSDE1* to the *LDLR* 3' UTR, we transiently expressed luciferase  
256 constructs (Fig. 4E) under control of the native *LDLR* promoter in the *CSDE1* knockdown cells.  
257 The luciferase-only constructs showed appropriate physiologic upregulation by sterols,  
258 regardless of *CSDE1* knockdown (Fig. S9). Constructs fused to the *LDLR* 3' UTR, but not those  
259 fused to the *LDLR* coding sequence alone, exhibited increased reporter activity with *CSDE1*  
260 knockdown (Fig. 4F). Notably, this increase in activity was attenuated by removing the first of  
261 four AREs (61, 63) from the 3' UTR (Fig. 4F). Activity of the 3' UTR-fused construct increased  
262 further with statin coadministration (Fig. 4G), suggesting that *CSDE1* knockdown may be  
263 synergistic with statins, consistent with our prior results (Fig. 3). Taken together, we conclude  
264 that under physiologic conditions, *CSDE1* mediates decay of the *LDLR* mRNA through its 3'  
265 UTR, with the first ARE of the UTR required for its full effect.

266  
267 *Disruption of CSDE1 Upregulates the LDLR in vivo*

268 We then turned to an *in vivo* model in zebrafish, as the 3' UTR of its ortholog *ldlra*  
269 (XM\_005163870.4) is highly AU-rich and contains at least two canonical ARE sequences for  
270 mRNA regulation (64). We employed yolk microinjection of a Cas9-ribonucleoprotein (RNP)  
271 complex containing redundant guides to achieve near-saturation gene disruption (65), followed  
272 with dietary cholesterol supplementation, and evaluated total cholesterol in the larvae (66).  
273 Targeting of *csde1* protected against cholesterol accumulation, with a modest (12%) but  
274 significant reduction in total cholesterol in 8-day post fertilization (dpf) zebrafish, without any  
275 obvious phenotypic abnormalities (Figs. 5A, S10). By contrast, targeting of *ldlra* showed the  
276 expected 1.4-fold increase in total cholesterol (Fig. 5A) (66).

277  
278 We next probed the effect of *Csde1* gene silencing in the mouse as a therapeutic proof-of-  
279 principle, given even greater homology between the 3' UTRs of the murine and human *LDLR*  
280 orthologs (67). Using C57BL/6 mice on an atherogenic diet (68), we delivered shRNA against  
281 *Csde1* (59), *Pcsk9*, or scramble control via low-dose adeno-associated virus 8 (AAV8). Two

282 weeks later, we observed a 25% reduction in fasting plasma cholesterol in the *Csde1*  
283 knockdown mice, which exceeded the effect of *Pcsk9* knockdown (Fig. 5B). We then re-dosed  
284 the *Csde1* and scramble AAV8-shRNA and, 2 weeks later, observed an even stronger  
285 phenotype (Fig. S11A). Lipoprotein fractionation of the mouse plasma showed that *Csde1*  
286 knockdown mostly affected the VLDL-containing fractions (Fig. 5C), consistent with upregulation  
287 of the murine LDLR on our dietary background (69, 70). Accordingly, we observed an increase  
288 in *Ldlr* expression in the liver tissue of the *Csde1* knockdown mice (Fig. S11B). Notably, we  
289 observed no differences in appearance or behavior of the mice, nor in plasma levels of alanine  
290 aminotransferase activity (Fig. S11C), arguing against hepatic or systemic toxicity of either the  
291 *Csde1* shRNA or the gene knockdown.

292  
293 To gain further insight, we performed bulk RNA sequencing on the liver tissue (Figs. 5D, S11D-  
294 F, Table S10). We compared the *Csde1* knockdown to control (scramble) mice, using the mice  
295 with the highest transcript counts of a vector-delivered eGFP reporter to control for variations in  
296 transduction efficiency. We then filtered our results for the differentially expressed transcripts in  
297 the control mice at the extremes of eGFP expression, to control for the effects of viral  
298 transduction alone. As expected, we found higher *Ldlr* expression in the *Csde1* knockdown mice  
299 ( $\log_2FC = 0.43$ ,  $p = 0.0029$ , Table S10). Consistent with our mechanistic hypothesis, GO  
300 enrichment analysis of the differentially expressed genes revealed that mRNA processing was  
301 the most significantly downregulated biological process in the *Csde1* knockdown mice (OR =  
302 2.7, adj.  $p = 0.0085$ , Figs. 5D, S11F, Table S11). Spliceosome complex assembly was also  
303 significantly downregulated (OR = 7.4, adj.  $p = 0.0085$ , Figs. 5D, S11F, Table S11).

## 304 305 Discussion

306 The powerful biology of the LDLR is unquestioned in cardiovascular medicine (71). Since their  
307 introduction, statins, which upregulate the LDLR, have become a major public health success,  
308 and with the discovery of PCSK9 and the therapeutic antibodies targeting it, patients can safely  
309 reach much lower LDL levels than is achievable by statins alone (10). Together, this suggests  
310 that we can push further on this LDL-LDLR axis and still achieve a clinical benefit.

311  
312 In this study, we modeled a clinically relevant phenotype of LDLR abundance and function,  
313 complementing the independent investigations of other groups (72, 73). When synthesizing our  
314 screening and validation data together with large-scale genomics and additional pharmacologic  
315 perturbations, we produce an exploratory map of potential regulatory mechanisms for the LDLR  
316 (Fig. 6). These data represent not just promising targets but also pathways likely to be impacted  
317 by therapies already in use in the clinic.

318  
319 We have shown that *CSDE1*, one of our strongest hits, regulates LDLR levels in HepG2 cells by  
320 promoting *LDLR* mRNA decay via its 3' UTR. These data lay in concert with *CSDE1*'s  
321 destabilizing effects on other transcripts, such as c-Fos (60). We have also shown that *in vivo*  
322 knockdown of *Csde1* upregulates the hepatic LDLR and improves atherogenic lipid profiles in  
323 mice. This mimics the effect of deleting the 3' UTR *in vivo* (74) and illustrates the promise of  
324 targeting *CSDE1* to lower LDL and protect against atherosclerosis. It is notable that several  
325 small molecules, including triciribine (63) and berberine (67, 75), have stabilizing effects on  
326 *LDLR* mRNA, though whether their mechanisms directly involve *CSDE1* remain to be  
327 elucidated. The magnitude of LDLR upregulation imparted by *CSDE1* knockdown mirrors or  
328 exceeds that of *HMGCR* and *PCSK9* in both tissue culture and mouse models, suggesting that  
329 a high-fidelity approach targeting *CSDE1*-mediated *LDLR* mRNA decay in the clinic could have  
330 similarly impressive effects. Additionally, our mechanistic data suggest that targeting *CSDE1*  
331 would be at least additive with the use of statins.

332  
333



333 The degree to which CSDE1 inhibition affects other transcripts, or other tissues (59, 76),  
334 remains an important question. As an RNA chaperone, CSDE1 can have a variety of effects,  
335 from mRNA stabilization (58) to promotion or inhibition of translation (77–80), dependent on the  
336 identity of the RNA it binds and the cofactors with which it interacts. Intriguingly, though CSDE1  
337 was found to bind biotinylated *LDLR* 3' UTR transcripts in HepG2 cell lysates (62), cross-linking  
338 immunoprecipitation approaches in both mouse brain and melanoma cells failed to identify  
339 *LDLR* mRNA as a CSDE1 binding partner (81, 82). This suggests that the CSDE1-*LDLR*  
340 interaction is context dependent. Advances in liver-specific delivery of gene-silencing agents  
341 (16, 83), novel gene editing technologies (84), and small molecules (85) offer the possibility that  
342 selectively targeting hepatic CSDE1 for cholesterol lowering could avoid systemic toxicities.  
343

344 Though we observed no toxicity, transcriptional profiling suggests that disrupting hepatic  
345 CSDE1 upregulates both apoptosis-related and GTPase-mediated signaling pathways (Figs.  
346 5D, S11F, Table S11). Notably, CSDE1 appears to protect from apoptosis in both colorectal  
347 cancer (86) and Huh7 cells (87). Though biologically plausible, we hesitate to make definitive  
348 conclusions from these data since the cholate-rich diet we used to obtain hyperlipidemia also  
349 causes liver inflammation and hepatic steatosis (88). Despite this confounder, we expect that  
350 our transcriptomic analysis will guide further investigations of potential toxicities from hepatic  
351 CSDE1 disruption. Given that CSDE1 has such varied effects on other transcripts, future  
352 mechanistic dissection of the hepatic CSDE1-*LDLR* interaction could identify what makes this  
353 relationship unique and guide a potential therapeutic strategy. Combination therapies targeting  
354 interconnected pathways to disease can provide increased benefits without inducing extreme  
355 side effects, with angiotensin receptor blockade and neprilysin inhibition in heart failure a  
356 prominent clinical example (89). Though speculative, we are intrigued by the effects of CSDE1  
357 on mRNA splicing (Figs. 5D, S11F, Table S11), and we note in particular that the spliceosome  
358 helicase DDX39B was both validated as a regulator of the *LDLR* from our CRISPRi screen (Fig.  
359 2, Table S8) and downregulated by *Csde1* knockdown *in vivo* ( $\log_2FC = -0.32$ ,  $p = 0.011$ , Table  
360 S10). To the extent hepatic CSDE1 utilizes specific factors to downregulate *LDLR* mRNA,  
361 simultaneous tissue-specific drugging of both CSDE1 and these factors could widen the overall  
362 therapeutic window. We anticipate that our study will serve as the seed for these and other  
363 further investigations.  
364

## 365 **Methods**

### 366 *Study Design*

367 We designed the study as a discovery biology experiment to identify new regulators of the LDL  
368 receptor. We used an established tissue culture model, HepG2 cells, to evaluate for LDL  
369 receptor regulation. We used wild-type zebrafish (Ekwil) and wild-type mice (C57BL/6) to  
370 validate the contribution of our top hit, CSDE1, to LDL receptor regulation *in vivo*. We evaluated  
371 sufficient cells for the *LDLR* and *TFR* screens to provide adequate coverage for transduction  
372 and downstream sequencing of each sgRNA in the genome-wide library. Sample sizes for  
373 animal experiments were estimated to provide 80% power (two-tailed  $\alpha = 0.05$ ) for a 25% effect  
374 in cholesterol levels compared to controls, based on effects in these models in the existing  
375 literature. The numbers of animals used in each experiment are noted in the figures and  
376 manuscript. Unless otherwise noted, all *in vitro* data are representative of multiple ( $\geq 3$ )  
377 experimental outcomes to ensure robust outcomes. Experiments were not performed in a  
378 blinded fashion. All animal studies were performed in accordance with IACUC approved  
379 protocols at the University of California, San Francisco.  
380

### 381 *Plasmids and Cloning*

382 SFFV-dCas9-BFP-KRAB (Addgene 46911), CRISPRi/a v2 (Addgene 84832), pMD2.G, dR8.91,  
383 and the hCRISPRi v2 top5 sgRNA library (Addgene 83969) were gifts from L. Gilbert and J.

384 Weissman. Oligonucleotides of the protospacers of validated sgRNA sequences (14), as well as  
385 those for PCR amplification and isothermal assembly, were obtained from Elim  
386 Biopharmaceuticals (Hayward CA). Protospacers were cloned into the CRISPRi/a v2 vector  
387 using restriction enzyme digest (BlnI and BstXI, ThermoFisher, Waltham MA) and ligation with  
388 10× T4 ligase (NEB, Ipswich MA). CSDE1 overexpression constructs were created by PCR  
389 expansion of *CSDE1* (HsCD00949797, DNASU, Tempe AZ) or AcGFP1 (vector control,  
390 pIRES2-AcGFP1, Clontech, Mountain View CA) and isothermal assembly (90) into the  
391 pcDNA5/FRT/TO backbone (ThermoFisher), followed by site-directed mutagenesis to generate  
392 the four CSDE1 isoforms (UniprotKB O75534 1 through 4). pLuc2-Prom<sub>LDLR</sub> was created by  
393 PCR expansion of the target luciferase from pGL4Luc-RLuc (Addgene 64034), custom gene  
394 synthesis of the LDLR promoter (NCBI Reference Sequence NG\_009060.1, from -687 bp to the  
395 *LDLR* start codon, Twist Biosciences, South San Francisco CA) and isothermal assembly into  
396 the pcDNA5/FRT/TO backbone. pSS-NLuc was created by PCR expansion of the target  
397 luciferase from pNL1.1 (Promega, Madison WI) into a vector containing the PCSK9 signal  
398 sequence from the same backbone (91). The remaining pLuc2-Prom<sub>LDLR</sub> constructs were  
399 created by PCR expansion of the coding region of *LDLR* (HsCD00004643, DNASU), custom  
400 gene synthesis of the 3' UTR of the *LDLR* mRNA (NCBI Reference Sequence  
401 NM\_001252658.1, Twist Biosciences), or custom oligonucleotides to add the P2A ribosomal  
402 skipping linker (92, 93) and isothermal assembly into pLuc2-Prom<sub>LDLR</sub>, as appropriate for each  
403 construct. All plasmids were confirmed by Sanger sequencing. Expansion of the top5 sgRNA  
404 library was as previously described (13).

405

#### 406 *Cell Culture and Lentiviral Production*

407 HepG2 (ATCC HB-8065) and derivatives were cultured in low-glucose DMEM (1 g/L,  
408 ThermoFisher) with 10% FBS (Axenia BioLogix, Dixon CA), GlutaMax (ThermoFisher) and 1×  
409 penicillin-streptomycin (ThermoFisher), and sent thrice through a 21g needle during passaging  
410 to minimize cell clumping. HEK-293T (ATCC CRL-3216) were cultured in standard DMEM  
411 (ThermoFisher) with 10% FBS. All cell lines were cultured at 37 °C at 5% CO<sub>2</sub>, seeded for  
412 approximately 50% confluency at the time of experiment, and were confirmed free of  
413 *Mycoplasma* contamination by the MycoAlert PLUS Mycoplasma Detection Kit (Lonza,  
414 Switzerland). Lentivirus was produced in 293T cells by transfection of dR8.91, pMD2.G, and the  
415 appropriate pLKO-derived vector (at ratios of 8 µg, 1 µg, and 8 µg, respectively, per 15 cm dish)  
416 with Trans-LT1 (Mirus Bio, Madison WI), according to the manufacturer's instructions. Viral  
417 harvest media was supplemented with Viralboost (Alstem, Richmond CA), collected 2-3 days  
418 after transfection, and filtered through 0.44 µm polyvinylidene difluoride filters and either frozen  
419 for storage at -80 °C or used immediately for transduction.

420

#### 421 *Generation of CRISPRi Cell Lines*

422 All cell lines were transduced using virus-containing supernatant in the presence of 8 µg/ml  
423 polybrene (Millipore-Sigma, St. Louis MO). HepG2 expressing dCas9-KRAB were derived by  
424 transduction with lentivirus harboring SFFV-dCas9-BFP-KRAB, followed by two rounds of FACS  
425 for BFP-positive cells on a BD FACSAria II. dCas9-KRAB HepG2 with individual targeting  
426 sgRNAs were derived by transduction with lentivirus harboring the desired sgRNA, followed by  
427 48 hrs of puromycin selection (2 µg/ml, InvivoGen, San Diego CA), prior to experiments.

428

#### 429 *Quantitative Real-Time PCR*

430 dCas9-KRAB HepG2 stably expressing an appropriate sgRNA were harvested, lysed, and total  
431 RNA was extracted via the RNeasy Mini Kit (Qiagen, Germantown MD). RNA was converted  
432 into cDNA using qScript cDNA SuperMix (QuantaBio, Beverly MA) following the manufacturer's  
433 instructions. RT-qPCR was performed against indicated targets with PrimeTime qPCR primers  
434 (IDT, Coralville IA) using the SYBR Select Master Mix (ThermoFisher) according to the



435 manufacturer's instructions on a CFX96 Touch Real-Time PCR Detection System (BioRad,  
436 Hercules CA). Fold changes were calculated using  $\Delta\Delta C_t$  analysis, normalizing each sample to  
437 B2M controls, using CFX Maestro software (BioRad).

438

#### 439 *Receptor Abundance Analysis*

440 1-2 days prior to analysis, dCas9-HepG2 cells and derivatives were cultured in low-glucose  
441 DMEM with 5% lipoprotein deficient serum (Kalen Biomedical, Germantown MD). Prior to  
442 analysis, cells were dissociated with Accutase (Innovative Cell Technologies, San Diego CA),  
443 collected, washed in PBS (ThermoFisher), live-dead stained with Ghost Dye Red 780 (1:1000  
444 dilution, Tonbo Biosciences, San Diego CA), washed, and then stained with the indicated  
445 antibody in FACS buffer (PBS with 1% FBS, 10 U/ml DNase I, GoldBio, St. Louis MO) for 30  
446 minutes on ice with gentle agitation. Cells were washed, resuspended in FACS buffer, filtered  
447 through 90  $\mu\text{m}$  mesh (Elko Filtering, Miami FL) to give a single cell suspension, and placed on  
448 ice. Cells were then analyzed on either a BD Fortessa, BD LSR II, BD FACSAria II, or Beckman  
449 Coulter CytoFLEX, or sorted on a BD FACSAria II, depending on the experiment. In general,  
450 gating excluded cells positive for live-dead staining and included only the cells positive for the  
451 level of BFP expression induced by the CRISPRi/a v2 vector. FACS analysis and figure  
452 preparation was performed with FlowJo v10 (BD, Ashland OR).

453

#### 454 *Genome-Wide CRISPRi Screen*

455 The screen was conducted similarly to prior descriptions (13–15). Approximately  $200 \times 10^6$   
456 dCas9-KRAB HepG2 were transduced with hCRISPRi-v2 top 5 sgRNAs/gene lentivirus at an  
457 MOI of  $\sim 0.5$ , and with polybrene at 8  $\mu\text{g}/\text{ml}$ , on day 1. Cells were grown on 15-cm dishes,  
458 subdivided into four replicates immediately upon transduction (biological duplicate for each  
459 screen), and reseeded every 3–4 days as necessary to avoid overconfluence. Cells were  
460 selected with puromycin (2 mg/ml) from day 2 through day 6. On day 5, cells for the LDLR sort  
461 were placed in DMEM with lipoprotein depleted serum (5%). On day 7, approximately  $50 \times 10^6$   
462 cells from 2 replicates were live-dead stained and stained for LDLR as described above, and  
463 then two-way sorted on a BD FACSAria II for the top and bottom 33% by LDLR abundance.  
464 Cells were spun down, washed in PBS and frozen at  $-80^\circ\text{C}$ . On day 8, the sort was repeated  
465 except in one replicate, cells were stained for TFR instead of LDLR and then sorted as per  
466 above. Genomic DNA was isolated using a NucleoSpin Blood DNA extraction kit (Macherey-  
467 Nagel, Bethlehem PA). The sgRNA-containing region was PCR-amplified with NEBNext Ultra II  
468 Q5 MasterMix (NEB), acrylamide gel-purified, and size-selected by SPRI beads (Beckman  
469 Coulter, Indianapolis IN), all as previously described, prior to sequencing on an Illumina HiSeq  
470 4000.

471

#### 472 *Screen Processing*

473 Sequencing data were aligned to the top5 library, counted, and quantified using the  
474 ScreenProcessing pipeline (accessed from <https://github.com/mhorlbeck/ScreenProcessing>(14)  
475 4/25/2019). Phenotypes and Mann-Whitney  $P$  values were determined as previously described  
476 (14), with the phenotypes defined as follows:  $\rho$  indicated the comparison in high-abundance vs.  
477 low abundance cells,  $\tau$  indicated the comparison in high-abundance vs. unsorted cells, and  $\gamma$   
478 indicated the comparison in low-abundance vs. unsorted cells. Counts from 4 guides were  
479 removed from the final analysis as there was evidence of contamination from individually cloned  
480 plasmids (PCSK9\_+\_55505255.23-P1P2, HMGCR\_+\_74633053.23-P1P2, TFRC\_-  
481 \_195808987.23-P1P2, ACO1\_-\_32384733.23-P1P2). A hit threshold of 7 (normalized  
482 phenotype z score  $\times -\log_{10}(\text{p-value}) \geq 7$ ) (13) was used to identify hits from  $\rho$ ,  $\tau$ , and  $\gamma$   
483 phenotypes, which were then compiled. Identical analysis of the TFR screen was used to  
484 prioritize hits unique to LDLR regulation. Gene ontology analysis was performed using the

485 PANTHER Classification System database (v15) (28, 94). For relaxation of the hit threshold for  
486 comparison to GWAS studies, a score of 6 was used. Cellular localization of hits was imputed  
487 by manual curation from UniProt (95) and the Human Protein Atlas (55).

488

#### 489 *Human Genomic Analysis*

490 Protein coding variants for hits validated at the individual sgRNA level were assayed in the UK  
491 Biobank (96) for associations with LDL-C. In the setting of a statin medication, LDL-C was  
492 divided by 0.7 as before (30). Genotyping and imputation was performed in the UK Biobank as  
493 previously described (32), and nonsynonymous protein coding variants with minor allele  
494 frequencies greater than 0.001 were considered. Efficient linear mixed models adjusting for age,  
495 sex, genotyping array, and principal components of ancestry were employed, using BOLT-LMM  
496 (97). Statistical significance was assigned at  $\alpha = 0.05/117 = 0.000427$  to account for multiple  
497 hypothesis testing.

498

#### 499 *Validation Experiments of Individual sgRNAs*

500 Cloning of protospacers, as described above, was performed in 96-well plate format until  
501 selecting individual colonies. Lentiviral production in 293T, transduction of dCas9-KRAB HepG2  
502 with lentiviral sgRNA vectors, and receptor abundance and LDL uptake assays were similarly  
503 performed in 96-well plate format to maximize throughput.

504

#### 505 *LDL Uptake Assays*

506 Assays were performed as previously described(33) with the following modifications. dCas9-  
507 HepG2 cells harboring individual sgRNAs were treated similarly to receptor abundance analysis,  
508 except that prior to harvest, cells were washed and then treated with 5  $\mu\text{g/ml}$  1,1'-dioctadecyl-  
509 3,3,3',3'-tetramethylindocarbocyanine perchlorate (DiI) labeled LDL (Kalen Biomedical) in low-  
510 glucose DMEM with 0.5% BSA (MilliporeSigma) for 1 hr at 37 °C. Cells were then washed,  
511 collected, and prepared for FACS analysis, as described above, but without antibody labelling.

512

#### 513 *Pharmacologic Synergy Experiments*

514 Receptor and LDL uptake assays were performed as described, with cells treated overnight with  
515 either simvastatin (6  $\mu\text{M}$ , MilliporeSigma), PF-6846 (10  $\mu\text{M}$ , MilliporeSigma), or DMSO vehicle  
516 (final concentration of 0.5%) overnight prior to analysis. Synergy scores were calculated by the  
517 following equation:

518

$$519 \quad (LDLR_{sgRNA+compound} - LDLR_{NegCtrl+compound}) - (LDLR_{sgRNA+vehicle} - LDLR_{NegCtrl+vehicle})$$

520

521 with  $LDLR$  obtained as the mean fluorescence, background subtracted from an unstained  
522 control and subsequently normalized to  $LDLR_{NegCtrl+vehicle}$  within a given experiment.

523

#### 524 *Overexpression Experiments*

525 HepG2 or engineered dCas9-HepG2 cell lines were seeded into 96 well plates at  $5 \times 10^4$  cells  
526 per well in HepG2 growth medium. After 24 hrs, cells were washed and changed into low-  
527 glucose DMEM with 5% lipoprotein-deficient serum. Each well was transfected with 100 ng of  
528 the appropriate CSDE1 overexpression construct, or vector control, in a total of 10  $\mu\text{L}$  OptiMEM  
529 (ThermoFisher) using Lipofectamine 3000 (ThermoFisher) according to the manufacturer's  
530 instructions. Cells were incubated at 37 °C with 5%  $\text{CO}_2$  for 72 hrs, and then harvested for LDL  
531 receptor expression analysis as above.

532

#### 533 *mRNA Decay Experiments*

534 Engineered dCas9-HepG2 cell lines harboring sgRNAs against CSDE1  
535 (CSDE1\_+\_115300577.23-P1P2) or a negative control (Unassigned=negZNF335\_-  
536 \_44601297.24-all) were seeded into 12 well plates at  $5 \times 10^5$  cells per well in HepG2 growth  
537 medium. After 24 hrs, cells were washed and changed into sterol-depleting media (low-glucose  
538 DMEM with 5% lipoprotein-deficient serum) supplemented with 6  $\mu$ M simvastatin. After an  
539 additional 24 hrs, actinomycin D (MilliporeSigma) was added at 5  $\mu$ g/ml, and cells were  
540 harvested as described at the indicated timepoints.

#### 541 *Immunoblots*

543 Engineered dCas9-HepG2 cell lines harboring appropriate sgRNAs were grown in growth  
544 medium and harvested with 0.25% trypsin digestion. Cells were washed and lysed in lysis buffer  
545 on ice (50 mM Tris-HCl pH 7.4, 150 mM NaCl, 0.1% NP-40). Lysates were clarified at  $21,000 \times$   
546  $g$  for 10 min, and the supernatant was recovered. Equivalent amounts of lysates, as measured  
547 by BCA assay (ThermoFisher), were resolved on 4-12% Bis-Tris NuPAGE gels (ThermoFisher),  
548 transferred to nitrocellulose, probed with primary and secondary antibodies as noted (see Table)  
549 in 5% BSA in TBS-T, and visualized on an Odyssey imaging system (LI-COR, Lincoln NE).

#### 550 *Dual-Luciferase Assays*

552 Engineered dCas9-HepG2 cells were seeded into opaque white 96 well plates, at  $2.2 \times 10^4$  cells  
553 per well, in 100  $\mu$ L growth medium the day prior to transfection. On day of transfection, medium  
554 was replaced or changed to sterol-depleted medium (low-glucose DMEM with 5% lipoprotein-  
555 deficient serum) with or without 6  $\mu$ M simvastatin as appropriate. Each well was transfected with  
556 100 ng of Luc2-Prom<sub>LDLR</sub> based construct and 1 ng of secreted nanoluciferase control construct  
557 (pSS-NLuc) in a total of 10  $\mu$ L OptiMEM using Lipofectamine 3000 according to the  
558 manufacturer's instructions. 6 replicates were transfected per construct per experiment. After 48  
559 hours at 37°C and 5% CO<sub>2</sub>, 10  $\mu$ L of medium was removed from each plate and aliquoted into a  
560 separate 384 well plate. Firefly luciferase activity was evaluated in the plates containing the  
561 cells by adding an equal volume of a 2 $\times$  firefly lytic assay buffer (100 mM Tris-HCl pH 7.7, 50  
562 mM NaCl, 2 mM MgCl<sub>2</sub>, 0.17% Triton X-100, 10 mM DTT, 0.4 mM coenzyme A, 0.3 mM ATP,  
563 and 0.28 mg/ml luciferin (Goldbio)) (98). Nanoluciferase activity was evaluated from the  
564 conditioned medium using a non-lytic 2 $\times$  coelenterazine (Goldbio) reagent as previously  
565 described (91). Raw luminescence was obtained on a SPARK plate reader (Tecan, San Jose  
566 CA) with 1 second integration time. Readout of firefly luciferase in each well was normalized to  
567 the corresponding secreted nanoluciferase control and data were visually inspected and  
568 cleaned to remove values from poorly transfected wells (formally defined by ROUT = 1%) during  
569 analysis.

#### 570 *Zebrafish Handling, Maintenance, and Cas9-Ribonucleoprotein Knockdowns*

572 All zebrafish studies were performed as previously described(65) with minor modifications.  
573 Briefly, wild type zebrafish embryos were injected at the one-cell stage with Cas9-RNP  
574 complexes and raised at 28 °C. Cas9-RNP complexes were prepared as previously  
575 described(65) using custom oligonucleotides against the indicated targets (Elim  
576 Biopharmaceuticals). Targeting of tyrosinase, which results in larval albinism, was used as an  
577 injection control. Larvae were fed a diet of Golden Pearls (5-50 micron, Brine Shrimp Direct,  
578 Ogden UT) 3 $\times$  daily from 4 days post fertilization (dpf), fasted on 7 dpf to clear intestinal  
579 cholesterol, and harvested at 8 dpf. Larvae were collected, extensively washed, anesthetized in  
580 tricaine, and collected in groups of 10 per sample prior to storage at -80 °C. All zebrafish  
581 experiments were performed in accordance with IACUC-approved protocols at the University of  
582 California, San Francisco.

583

584 *Cholesterol Analysis of Zebrafish Homogenates*

585 Total cholesterol levels were analyzed as previously described (66) with minor modifications.  
586 Briefly, frozen larvae were homogenized in PBS with a plastic pestle, and then clarified at  
587  $18,000 \times g$  for 15 min. Supernatants were recovered and total protein content was analyzed by  
588 BCA assay. Homogenates were then analyzed, in duplicate, at the appropriate dilution (typically  
589 1:12 in PBS) for total cholesterol content using a commercial fluorometric assay (Cayman  
590 Chemical, Ann Arbor MI). Fluorescence outputs were measured on a Tecan SPARK plate  
591 reader, and cholesterol concentrations were interpolated from a regression line calculated from  
592 a standard curve. Cholesterol levels were normalized to total protein content for analysis and  
593 subsequently to the scramble control for comparison between experiments.  
594

595 *Mouse Handling, Maintenance, and shRNA Knockdowns*

596 All mouse manipulations were performed in accordance with IACUC approved protocols at the  
597 University of California, San Francisco following guidelines described in the US National  
598 Institutes of Health Guide for the Care and Use of Laboratory Animals. 8-10 week old male  
599 C57BL/6 mice (The Jackson Laboratory, Bar Harbor ME) were placed on an atherogenic diet  
600 (1.25% cholesterol, 15% fat, 0.5% cholate, D12336i, Research Diets, New Brunswick NJ)(68) at  
601 the beginning of the experiment (week 0). At week 2, AAV8-packaged shRNA against mouse  
602 *Csde1* (NM\_144901), *Pcsk9* (NM\_153565), or scramble control (Vector Biolabs, Malvern PA)  
603 were diluted in sterile PBS to a concentration of  $2 \times 10^{11}$  genomes/ml. 100  $\mu$ L of diluted AAV8 ( $2$   
604  $\times 10^{10}$  genomes/mouse) harboring the appropriate shRNA was administered to each mouse via  
605 tail vein injection. At week 4, and again at week 6, mice were fasted overnight and then  
606 underwent blood sampling via submandibular vein puncture. Approximately 50  $\mu$ L of blood was  
607 collected into an EDTA-coated tube, centrifuged at  $2000 \times g$  for 10 min at 4 °C, and the plasma  
608 recovered and stored at -20 °C until further analysis. Total cholesterol of the plasma, after  
609 approximately 1:200 to 1:400 dilution in assay buffer, was evaluated by commercial fluorometric  
610 cholesterol assay (Cayman) as described above. At week 8, mice from the same exposure arm  
611 were re-dosed with AAV8 targeting either *Csde1* or scramble control. At week 10, the mice were  
612 again fasted overnight and then euthanized after CO<sub>2</sub> narcosis followed by cervical dislocation.  
613 The abdominal cavity was opened with a ventral midline incision, the IVC was cannulated, and  
614 plasma was collected as described above. The liver and vasculature were perfused with PBS,  
615 and the samples of the liver were harvested. Tissue samples for RNA evaluation were placed in  
616 TRIzol (ThermoFisher) and those for protein analysis were flash frozen in liquid N<sub>2</sub> and stored at  
617 -80 °C.  
618

619 *Lipoprotein Fractionation*

620 Plasma samples were thawed and centrifuged at  $2000 \times g$  for 10 min at 4 °C, and the  
621 supernatant recovered. 100  $\mu$ L of individual mouse plasma was loaded onto a Superose 6  
622 Increase 10/300 GL column (Cytiva, Marlborough MA) and eluted with PBS with 1 mM EDTA at  
623 0.5 ml/min on an AKTA Pure chromatography system (Cytiva). Fixed 0.5 ml fractions were  
624 collected from 0.2 to 1 column volumes along the isocratic elution. Fractions were subjected to  
625 total cholesterol analysis and immunoblots as described above.  
626

627 *RNA-seq Library Preparation*

628 Total RNA was extracted from frozen liver samples using the Qiagen RNeasy Plus Universal  
629 mini kit followed by Manufacturer's instructions (Qiagen). RNA samples were quantified using  
630 Qubit 2.0 Fluorometer (ThermoFisher) and RNA integrity was checked using Agilent  
631 TapeStation 4200 (Agilent Technologies, Palo Alto CA). Purified RNA was used for mouse  
632 qPCR experiments as described above. RNA sequencing libraries were prepared via polyA  
633 selection using the NEBNext Ultra RNA Library Prep Kit for Illumina using manufacturer's



634 instructions (NEB). Briefly, mRNAs were initially enriched with Oligod(T) beads. Enriched  
635 mRNAs were fragmented for 15 minutes at 94 °C. First strand and second strand cDNA were  
636 subsequently synthesized. cDNA fragments were end repaired and adenylated at 3'ends, and  
637 universal adapters were ligated to cDNA fragments, followed by index addition and library  
638 enrichment by PCR with limited cycles. The sequencing library was validated on the Agilent  
639 TapeStation (Agilent) and quantified by using Qubit 2.0 Fluorometer (Invitrogen) as well as by  
640 quantitative PCR (KAPA Biosystems, Wilmington, MA, USA). The sequencing libraries were  
641 clustered on a single lane of a flowcell. After clustering, the flowcell was loaded on the Illumina  
642 HiSeq instrument (4000 or equivalent) according to manufacturer's instructions. The samples  
643 were sequenced using a 2x150bp Paired End (PE) configuration. Image analysis and base  
644 calling were conducted by the HiSeq Control Software (HCS). Raw sequence data (.bcl files)  
645 generated from Illumina HiSeq was converted into fastq files and de-multiplexed using Illumina's  
646 bcl2fastq 2.17 software. One mismatch was allowed for index sequence identification. RNA  
647 library preparation and sequencing were conducted by GENEWIZ, LLC (South Plainfield, NJ).

648

#### 649 *RNA-seq Analysis*

650 All raw sequencing data underwent quality control checks with FastQC (v 0.11.8). Reads were  
651 mapped to the mm10 mouse reference genome using Rsubread (v 2.4.3) and assigned to  
652 Ensembl gene IDs. Ensembl gene IDs were then mapped to gene symbols using  
653 AnnotationDBI (v1.52.0). Gene expression was quantified using raw counts and differential  
654 expression gene testing was performed on the scramble-shRNA samples comparing the groups  
655 (n=3 in each group) at the highest and lowest levels of raw eGFP expression with EdgeR (99,  
656 100) (v.3.32.1) using the glmQLFit method, default settings (101). Statistical significance was  
657 set at 5% false discovery rate (FDR; Benjamini-Hochberg). Differential expression gene testing  
658 was then performed on the *Csde1*-shRNA and scramble-shRNA at the highest levels of eGFP  
659 expression with the overlap of differentially expressed genes identified between these two  
660 analyses subsequently removed. Functional enrichment gene-set analysis for GO (Gene  
661 Ontology) terms was performed using Enrichr (102) via the enrichR R package (v.3.0).  
662 Heatmaps were generated using the Bioconductor package ComplexHeatmap (103) (v.2.6.2)  
663 using log<sub>2</sub>-transformed CPM values (counts-per-million; values shown are log<sub>2</sub>-transformed and  
664 row-normalized). Volcano plots were generated using the Bioconductor package  
665 EnhancedVolcano (v.1.2.0).

666

#### 667 *Statistical Analysis*

668 Fluorescence values from gated populations in flow cytometry experiments were background  
669 corrected by unstained controls and were normalized to the values of the cell line harboring  
670 negative control sgRNA. Normalized data were then grouped by the Cochran method (104),  
671 and values for cell lines transduced with individual sgRNAs were compared those of the  
672 negative control by T-test with Holm-Sidak correction. For comparison of one-phase decay  
673 regression curves in mRNA decay experiments, the extra sum-of-squares F test was used.  
674 Pairwise testing to controls was performed in all other experiments using Welch's T-test with  
675 Holm-Sidak correction unless otherwise noted. One or two-way ANOVA with Tukey's or Sidak's  
676 multiple comparisons tests was used when comparing across all groups in a particular  
677 experiment. Adjusted p values < 0.05 were considered significant. Statistical analysis was  
678 performed using Prism 7 (GraphPad Software, San Diego CA). All experiments were replicated  
679 thrice unless otherwise noted.

680

#### 681 **Key Resources Tables**

| <b>Antibodies</b> |                    |              |               |                                 |
|-------------------|--------------------|--------------|---------------|---------------------------------|
| <b>Target</b>     | <b>Fluorophore</b> | <b>Clone</b> | <b>Source</b> | <b>Dilution and Final Conc.</b> |

|                            |                 |           |                           |                        |
|----------------------------|-----------------|-----------|---------------------------|------------------------|
| Human LDL Receptor         | Alexa Fluor 647 | 472413    | R&D Systems               | 1:100, 2 µg/ml (FACS)  |
| Human Transferrin Receptor | Alexa Fluor 647 | 29806     | R&D Systems               | 1:100, 2 µg/ml (FACS)  |
| Human Transferrin Receptor | Alexa Fluor 488 | 29806     | R&D Systems               | 1:100, 2 µg/ml (FACS)  |
| Human CSDE1                | None            | 62328     | Cell Signaling Technology | 1:1000 (WB)            |
| Human beta-Actin           | None            | 8H10D10   | Cell Signaling Technology | 1:2000 (WB)            |
| Mouse ApoA-I               | None            | 2G4       | Santa Cruz Biotechnology  | 1:1000 (WB)            |
| Mouse ApoB                 | None            | 2G11      | Millipore Sigma           | 1:1000 (WB)            |
| Rabbit IgG                 | IRDye 800CW     | 926-32211 | LI-COR                    | 1:5000, 0.1 µg/ml (WB) |
| Mouse IgG                  | IRDye 800CW     | 926-32210 | LI-COR                    | 1:5000, 0.1 µg/ml (WB) |

682

| qPCR Primers  |                 |                                                                        |        |        |
|---------------|-----------------|------------------------------------------------------------------------|--------|--------|
| Target        | Ref. Sequence   | Assay ID                                                               | Source | Conc.  |
| <i>B2M</i>    | NM_004048(1)    | Hs.PT.58v.18759587                                                     | IDT    | 300 nM |
| <i>LDLR</i>   | NM_000527(6)    | Hs.PT.58.2004261                                                       | IDT    | 300 nM |
| <i>HMGCR</i>  | NM_000859(2)    | Hs.PT.58.41105492                                                      | IDT    | 300 nM |
| <i>CSDE1</i>  | NM_001007553(6) | Hs.PT.58.40309152                                                      | IDT    | 300 nM |
| <i>PCSK9</i>  | NM_174936(1)    | Hs.PT.58.20317141                                                      | IDT    | 300 nM |
| <i>MYLIP</i>  | NM_013262(1)    | Hs.PT.58.39124976                                                      | IDT    | 300 nM |
| <i>TFRC</i>   | NM_003234(1)    | Hs.PT.39a.22214826                                                     | IDT    | 300 nM |
| <i>HNRNPD</i> | NM_031369(4)    | Hs.PT.58.3757916                                                       | IDT    | 300 nM |
| <i>KHSRP</i>  | NM_003685(1)    | Hs.PT.58.555216                                                        | IDT    | 300 nM |
| <i>B2m</i>    | NM_009735(1)    | Mm.PT.39a.22214835                                                     | IDT    | 300 nM |
| <i>Ldlr</i>   | NM_001252658(3) | Mm.PT.58.9930556                                                       | IDT    | 300 nM |
| <i>Csde1</i>  | NM_001161854(2) | Mm.PT.58.8160050                                                       | IDT    | 300 nM |
| <i>eGFP</i>   | n/a             | Custom Primers<br>Fwd: GAACCGCATCGAGCTGAA<br>Rev: TGCTTGTCGCCATGATATAG | IDT    | 300 nM |

683



684

## 685 **Acknowledgements**

686 We thank Max Horlbeck for guidance with the CRISPRi system, Jonathan D. Brown for helpful  
687 discussion on *in vivo* experimental designs, and Paul Cheng and Richard Baylis for helpful  
688 discussion on histologic insights and *in vivo* experimental planning. Plasmids for the CRISPRi  
689 system were a generous gift from Luke Gilbert and Jonathan Weissman. We thank the  
690 Gladstone Institutes Flow Cytometry core facility for their assistance with flow cytometry  
691 experiments. UK Biobank analyses were conducted using the UK Biobank resource under  
692 application 7089.

693

## 694 **Funding Sources**

695 Ar. P. receives support from the Tobacco-Related Disease Research Program (578649), the  
696 A.P. Giannini Foundation (P0527061), NIH/NHLBI (K08 HL157700), the Michael Antonov  
697 Charitable Foundation Inc., and the Sarnoff Cardiovascular Research Foundation. T.N. is  
698 supported by the Japan Society for the Promotion of Science Overseas Research Fellowship.  
699 P.N. is supported by a Hassenfeld Scholar Award from the Massachusetts General Hospital, the  
700 NIH/NHLBI (R01 HL142711, R01 HL148565, and R01 HL148050), and the Fondation Leducq  
701 (TNE-18CVD04). B.L.B. is supported by NIH grants R01 DK119621 and P01 HL146366. D.S. is  
702 supported by NIH grants P01 HL098707, P01 HL146366, R01 HL057181 and R01 HL127240,  
703 the Roddenberry Foundation, the L.K. Whittier Foundation, the Younger Family Fund, and the  
704 NIH/National Center for Research Resources grant C06 RR018928 to the Gladstone Institute.  
705 K.M.S. is supported by the Howard Hughes Medical Institute. J.S.C. is supported by the  
706 NIH/NHLBI (K08 HL124068 and R03 HL145259), a Pfizer ASPIRE Cardiovascular Award and  
707 the Harris Fund and Research Evaluation and Allocation Committee of the UCSF School of  
708 Medicine.

709

## 710 **Author Contributions**

711 Overall study design: J.S.C. Execution of *in vitro* screen and data processing: G.A.S. Genomic  
712 analyses: Ak.P., P.N. *In vitro* validation and synergy experiments, and analysis of mouse blood  
713 samples: J.S.C. Execution of zebrafish gene knockdowns: B.H.L., R.S.W. Oversight of zebrafish  
714 husbandry: R.S.W., B.L.B. Planning and execution of *in vivo* mouse experiments: Ar.P. Mouse  
715 handling, blood, and tissue collection: Ar.P., Y.C.L., T.N., N.S. Processing of RNA-seq data:  
716 Ar.P., An.P. Analysis of mouse samples: L.L., R.J. Critical data review and analysis: B.L.B, D.S.,  
717 K.M.S. Preparation of manuscript: J.S.C. Critical review and revision of manuscript: All authors.

718

## 719 **Declaration of Interests**

720 P.N. reports investigator-initiated grant support from Amgen, Apple, and Boston Scientific, and  
721 personal fees from Apple, Blackstone Life Sciences, and Novartis, all unrelated to the present  
722 work. R.S.W. is an employee of Amgen, Inc. D.S. is the scientific cofounder, shareholder, and  
723 director of Tenaya Therapeutics, unrelated to the present work. K.M.S. has consulting  
724 agreements for the following companies involving cash and/or stock compensation: Black  
725 Diamond Therapeutics, BridGene Biosciences, Denali Therapeutics, Dice Molecules,  
726 eFFECTOR Therapeutics, Erasca, Genentech/Roche, Janssen Pharmaceuticals, Kumquat  
727 Biosciences, Kura Oncology, Merck, Mitokinin, Petra Pharma, Revolution Medicines, Type6  
728 Therapeutics, Venthera, Wellspring Biosciences (Araxes Pharma). J.S.C. has received  
729 consulting fees from Gilde Healthcare and is an unpaid scientific advisor to Eko, both unrelated  
730 to this work.

731

## 732 **Resource and Data Availability Statement**

733 Additional supporting data are available upon request from the corresponding author. All  
734 requests for raw and analyzed data, and materials, including plasmids or cell lines, generated in

735 this study will be responded to promptly. UK Biobank data is available by application to the UK  
736 Biobank.

737

### 738 **Supplementary Materials**

739

740 Figure S1: Validation of dCas9-KRAB-HepG2 Cells.

741 Figure S2: Recovered sgRNAs from Screening Phenotypes.

742 Figure S3: Gene Ontology and Localization Analysis.

743 Figure S4: Selective LDLR Effect of Transmembrane Proteins.

744 Figure S5: Effect of Sterol Conditions on CSDE1 Knockdown.

745 Figure S6: Effect of CSDE1 Overexpression.

746 Figure S7: CSDE1 Knockdown at Protein Level.

747 Figure S8: Effect of *CSDE1* Knockdown on Decay of Non-*LDLR* Transcripts.

748 Figure S9: Physiologic Response of Luciferase Reporter System.

749 Figure S10: Visual Phenotypes of Zebrafish Cas9-sgRNA Saturation Gene Disruption.

750 Figure S11: Effects of *in vivo* *Csde1* Disruption in Mice.

751

752 Table S1: LDLR Screen Data by Gene (*provided as an Excel file*)

753 Table S2: LDLR Screen Data by Guide (*provided as an Excel file*)

754 Table S3: TFR Screen Data by Gene (*provided as an Excel file*)

755 Table S4: TFR Screen Data by Guide (*provided as an Excel file*)

756 Table S5: LDLR Screen Hits (*provided as an Excel file*)

757 Table S6: TFR Screen Hits (*provided as an Excel file*)

758 Table S7: Baseline Characteristics of UK Biobank Participants in Genomic Association Analyses  
759 (*included below*)

760 Table S8: Validation Data by Guide (*provided as an Excel file*)

761 Table S9: Pharmacology Synergy Data by Guide (*provided as an Excel file*)

762 Table S10: Differentially Expressed Genes by *in vivo* RNA Seq (*provided as an Excel file*)

763 Table S11: Enriched GO Terms by *in vivo* RNA Seq (*provided as an Excel file*)

764

765 **References**

- 766 1. M. S. Brown, J. L. Goldstein, A receptor-mediated pathway for cholesterol homeostasis,  
767 *Science* (80-. ). (1986), doi:10.1126/science.3513311.
- 768 2. J. L. Goldstein, M. S. Brown, A Century of Cholesterol and Coronaries: From Plaques to  
769 Genes to Statins, *Cell* **161**, 161–172 (2015).
- 770 3. J. L. Goldstein, M. S. Brown, The LDL receptor *Arterioscler. Thromb. Vasc. Biol.* (2009),  
771 doi:10.1161/ATVBAHA.108.179564.
- 772 4. M. G. Silverman, B. A. Ference, K. Im, S. D. Wiviott, R. P. Giugliano, S. M. Grundy, E.  
773 Braunwald, M. S. Sabatine, Association Between Lowering LDL-C and Cardiovascular Risk  
774 Reduction Among Different Therapeutic Interventions, *JAMA* **316**, 1289 (2016).
- 775 5. K. D. Kochanek, J. Xu, E. Arias, Mortality in the United States, 2019., *NCHS Data Brief* , 1–8  
776 (2020).
- 777 6. G. G. Schwartz, P. G. Steg, M. Szarek, D. L. Bhatt, V. A. Bittner, R. Diaz, J. M. Edelberg, S.  
778 G. Goodman, C. Hanotin, R. A. Harrington, J. W. Jukema, G. Lecorps, K. W. Mahaffey, A.  
779 Moryusef, R. Pordy, K. Quintero, M. T. Roe, W. J. Sasiela, J. F. Tamby, P. Tricoci, H. D. White,  
780 A. M. Zeiher, L. B. Schiavi, M. Garrido, A. F. Alvarisqueta, S. A. Sassone, A. P. Bordonava, A.  
781 E. Alves De Lima, J. M. Schmidberg, E. A. Duronto, O. C. Caruso, L. P. Novaretto, M. A.  
782 Hominal, O. R. Montaña, A. Caccavo, O. A. Gomez Vilamajo, A. J. Lorenzatti, L. R. Cartasegna,  
783 G. A. Paterlini, I. J. Mackinnon, G. D. Caime, M. Amuchastegui, O. R. Codutti, H. O. Jure, J. O.  
784 E. Bono, A. D. Hrabar, J. A. Vallejos, R. A. Ahuad Guerrero, F. Novoa, C. A. Patocchi, C. J.  
785 Zaidman, M. E. Giuliano, R. D. Dran, M. L. Vico, G. S. Carnero, P. N. Guzman, J. C. Medrano  
786 Allende, D. F. Garcia Brasca, M. H. Bustamante Labarta, S. Nani, E. D. S. Blumberg, H. R.  
787 Colombo, A. Liberman, H. L. Luciardí, G. D. Waisman, M. A. Berli, R. O. Garcia Duran, H. G.  
788 Cestari, H. A. Luquez, J. A. Giordano, S. S. Saavedra, J. H. Waites, N. Collins, A. Soward, P. E.  
789 Aylward, C. L. S. Hii, J. Shaw, M. A. Arstall, J. Horowitz, J. F. Rogers, D. Colquhoun, R. E.  
790 Oqueli Flores, P. Roberts-Thomson, O. Raffel, S. J. Lehman, S. G. M. Coverdale, P. J. Garrahy,  
791 G. Starmer, M. Sader, P. A. Carroll, R. Zweiker, U. Hoppe, H. Drexel, K. Huber, R. Berger, F.  
792 Weidinger, D. Faes, K. Hermans, B. Pirenne, A. Leone, E. Hoffer, P. Sinnaeve, M. C. M. Vrolix,  
793 L. De Wolf, B. Wollaert, M. Castadot, K. Dujardin, C. Beauloye, G. Vervoort, H. Striekwold, C.  
794 Convens, J. Roosen, E. Barbato, M. Claeys, F. Cools, I. Terzic, F. Barakovic, Z. Midzic, B.  
795 Pojskic, E. Fazlibegovic, M. Dilic, A. Durak-Nalbantic, D. Vulic, A. Muslibegovic, G. Reis, L.  
796 Sousa, J. C. Nicolau, F. E. Giorgeto, R. P. Silva, L. Nigro Maia, R. Rech, P. R. F. Rossi, M.  
797 Cerqueira, N. Duda, R. Kalil, A. Kormann, J. A. M. Abrantes, P. Pimentel Filho, A. P. Soggia, M.  
798 O. N. de Santos, F. Neuenschwander, L. C. Bodanese, Y. L. Michalaros, F. G. Eliaschewitz, M.  
799 H. Vidotti, P. E. Leaes, R. V. Botelho, S. Kaiser, E. R. F. Fernandes Manenti, D. B. Precoma, J.  
800 C. Moura Jorge, P. G. M. de B Silva, J. A. Silveira, W. Saporito, J. A. Marin Neto, G. S. Feitosa,  
801 L. E. F Ritt, J. A. de Souza, F. Costa, W. Souza, H. J. L. Reis, R. D. Lopes, L. Machado, J. C.  
802 Aidar Ayoub, G. V. Todorov, F. P. Nikolov, E. S. Velcheva, M. L. Tzekova, H. O. Benov, S. L.  
803 Petranov, H. S. Tumbbev, N. S. Shehova-Yankova, D. T. Markov, D. H. Raev, M. N. Mollov, K. N.  
804 Kichukov, K. A. Ilieva-Pandeva, N. N. Gotcheva, R. Ivanova, V. M. Mincheva, P. V. Lazov, B. I.  
805 Dimov, M. Senaratne, J. Stone, J. Kornder, S. Pearce, D. Dion, D. Savard, Y. Pesant, A.  
806 Pandey, S. Robinson, G. Gosselin, S. Vizel, G. Hoag, R. Bourgeois, A. Morisset, E. Sabbah, B.  
807 Sussex, S. Kouz, P. MacDonald, N. Michaud, D. Fell, R. Leung, T. Vuurmans, C. Lai, F. Nigro,  
808 R. Davies, G. Nogareda, R. Vijayaraghavan, J. Ducas, S. Lepage, S. Mehta, J. Cha, R. Dupuis,  
809 P. Fong, J. Rodes-Cabau, H. Fadlallah, D. Cleveland, T. Huynh, I. Bata, A. Hameed, C. Pincetti,  
810 S. Potthoff, J. C. Prieto, M. Acevedo, A. Aguirre, M. Vejar, M. Yañez, G. Araneda, M.  
811 Fernandez, L. Perez, P. Varleta, F. Florenzano, L. Huidobro, C. A. Raffo, C. Olivares, J. Chen,  
812 Y. Dong, W. Huang, J. Wang, S. Huang, Z. Yao, L. Cui, W. Lin, Y. Sun, J. Li, X. Zhang, H. Zhu,  
813 D. Chen, L. Huang, S. Dong, G. Su, B. Xu, X. Su, X. Cheng, J. Lin, W. Zong, H. Li, Y. Feng, D.  
814 Xu, X. Yang, Y. Ke, X. Lin, Z. Zhang, Z. Zheng, Z. Luo, Y. Chen, C. Ding, Y. Zheng, X. Li, D.  
815 Peng, Y. Li, M. Wei, S. Liu, Y. Yu, B. Qu, W. Jiang, Y. Zhou, X. Zhao, Z. Yuan, Y. Guo, X. Xu,

816 X. Shi, J. Ge, G. Fu, F. Bai, W. Fang, X. Shou, N. Jaramillo, G. Sanchez Vallejo, D. C. Luna  
817 Botia, R. Botero Lopez, D. I. Molina De Salazar, A. J. Cadena Bonfanti, J. Diego Higuera, S. I.  
818 Barrera Silva, H. J. Garcia Lozada, J. A. Coronel Arroyo, J. L. Accini Mendoza, R. L. Fernandez  
819 Ruiz, A. M. Fernandez, F. G. Manzur Jatin, A. Sotomayor Herazo, J. Castellanos Parada, M. A.  
820 Urina Triana, M. Strozzi, S. Car, D. Miličić, M. L. Benčić, H. Pintarić, D. Prvulović, J. Šikić, V.  
821 Peršić, D. Mileta, K. Štambuk, Z. Babić, J. Spinar, D. Horak, J. Stasek, D. Alan, V. Machova, A.  
822 Linhart, V. Novotny, V. Kaucak, R. Rokyta, R. Naplava, Z. Coufal, V. Adamkova, I. Podpera, J.  
823 Zizka, Z. Motovska, I. Marusicova, P. Svab, P. Ostadal, P. Heinc, J. Kuchar, P. Povolny, S. H.  
824 Poulsen, B. Raungaard, P. Clemmensen, L. E. Bang, O. May, M. Böttcher, J. D. Hove, L. Frost,  
825 G. Gislason, J. Larsen, P. B. Johansen, F. Hald, J. Jeppesen, T. Nielsen, K. S. Kristensen, P.  
826 M. Walichiewicz, J. D. Lomholdt, I. C. Klausen, P. K. Nielsen, F. Davidsen, L. Videbaek, M.  
827 Viigimaa, M. Soots, V. Vahula, A. Hedman, U. Soopõld, K. Märtsin, M. R. Taskinen, K. Porthan,  
828 J. K. Airaksinen, M. Juonala, T. Kiviniemi, S. Vikman, P. Posio, J. Taurio, H. Huikuri, K.  
829 Kaikkonen, P. Coste, E. Ferrari, N. Danchin, O. Morel, G. Montalescot, G. Barone-Rochette, J.  
830 Mansourati, Y. Cottin, F. Leclercq, A. Belhassane, N. Delarche, F. Boccara, F. Paganelli, J.  
831 Clerc, F. Schiele, V. Aboians, V. Probst, J. Berland, T. Lefèvre, V. Chumburidze, I. Khintbidze,  
832 T. Shaburishvili, Z. Pagava, R. Ghlonti, Z. Lominadze, G. Khabeishvili, R. Hemetsberger, U.  
833 Rauch-Kröhnert, M. Stratmann, K. F. Appel, E. Schmidt, H. Omran, C. Stellbrink, T. Dorsel, E.  
834 Lianopoulos, R. Marx, A. Zirlik, D. Schellenberg, T. Heitzer, U. Laufs, N. Marx, S. Gielen, B.  
835 Winkelmann, S. Behrens, K. Sydow, G. Simonis, T. Muenzel, N. Werner, S. Leggewie, D.  
836 Böcker, R. Braun-Dullaues, N. Toursarkissian, M. Jeserich, M. Weißbrodt, T. Schaeufele, J.  
837 Weil, H. Völler, J. Waltenberger, M. Natour, S. Steiner, L. Heidenreich, U. Gremmler, H. Killat,  
838 S. Patsilnakos, A. Kartalis, A. Manolis, D. Sionis, E. Liberopoulos, I. Skoumas, V. Athyros, P.  
839 Vardas, F. Parthenakis, D. Alexopoulos, G. Hahalis, J. Lekakis, A. Xatzitolios, S. R. Fausto  
840 Ovando, P. C. Montenegro Valdovinos, J. L. Arango Benecke, E. R. Rodriguez De Leon, B. P.  
841 Y. Yan, D. C. W. Siu, T. Turi, B. Merkely, R. G. Kiss, I. Ungi, G. Lupkovics, L. Nagy, A. Katona,  
842 I. Édes, G. Müller, I. Horvath, T. Kapin, J. Faluközy, M. Kumbra, M. Sandhu, S. Annam, N. R.  
843 Proddutur, R. K. Premchand, A. Mahajan, A. D. Abhyanakar, P. Kerkar, R. A. Govinda, A.  
844 Oomman, D. Sinha, S. N. Patil, D. Kahali, J. Sawhney, A. B. Joshi, S. Chaudhary, P. Harkut, S.  
845 Guha, S. Porwal, S. Jujjuru, R. B. Pothineni, M. R. Monteiro, A. Khan, S. S. Iyengar, J. S.  
846 Grewal, M. Chopda, M. C. Fulwani, A. Patange, V. K. Chopra, N. K. Goyal, R. Shinde, G. V.  
847 Manakshe, N. Patki, S. Sethi, V. Munusamy, S. Karna, S. Adhyapak, U. Pandurangi, R. Mathur,  
848 S. Kalashetti, A. Bhagwat, B. Raghuraman, S. K. Yerra, P. Bhansali, R. Borse, S. Das, J.  
849 Abdullakutty, S. Saathe, P. Palimkar, S. Atar, M. Shechter, M. Mosseri, Y. Arbel, C. Lotan, U.  
850 Rosenschein, A. Katz, Y. Henkin, A. Francis, M. Klutstein, E. Nikolsky, Y. Turgeman, M. Halabi,  
851 R. Kornowski, M. Jonas, O. Amir, Y. Rozenman, S. Fuchs, O. Hussein, D. Gavish, Z. Vered, Y.  
852 Caraco, M. Elias, N. Tov, G. Piovaccari, A. De Pellegrin, G. Guardigli, G. Licciardello, C.  
853 Auguadro, C. Cuccia, A. Salvioni, G. Musumeci, P. Calabrò, S. Novo, P. Faggiano, N. B. De  
854 Cesare, S. Berti, C. Cavallini, E. Puccioni, M. Galvani, M. Tespili, P. Piatti, M. Palvarini, G. De  
855 Luca, R. Violini, A. De Leo, P. Perrone Filardi, M. Ferratini, K. Dai, H. Kamiya, K. Ando, Y.  
856 Takeda, Y. Morino, Y. Hata, K. Kimura, K. Kishi, I. Michishita, H. Uehara, T. Higashikata, A.  
857 Hirayama, K. Hirooka, S. Sakagami, S. Taguchi, A. Koike, H. Fujinaga, S. Koba, K. Kozuma, T.  
858 Kawasaki, Y. Ono, M. Shimizu, Y. Katsuda, A. Wada, T. Shinke, T. Kimura, J. Ako, K. Fujii, T.  
859 Takahashi, T. Sakamoto, Y. Furukawa, H. Sugino, T. Mano, N. Utsu, K. Ito, T. Haraguchi, Y.  
860 Ueda, A. Nishibe, K. Fujimoto, J. H. Yoon, S. H. Kim, H. S. Park, I. H. Chae, M. H. Kim, M. H.  
861 Jeong, S. Rha, C. Kim, H. S. Kim, T. Hong, A. Busmane, N. Pontaga, A. Strelnieks, I. Mintale, I.  
862 Sime, Z. Petrulioniene, R. Kavaliauskiene, R. Jurgaitiene, G. Sakalyte, R. Slapikas, S. Norkiene,  
863 N. Misonis, A. Kibarskis, R. Kubilius, S. Bojovski, S. Kedev, N. Lozance, A. Kjovkaroski, S.  
864 Doncovska, T. K. Ong, S. Kasim, O. Maskon, B. Kandasamy, K. Yusoff, H. B. Liew, W. M. I.  
865 Wan Mohamed, A. García Castillo, G. A. Ramos López, J. Carrillo Calvillo, P. Fajardo Campos,  
866 J. C. Núñez Fragoso, E. A. Bayram Llamas, M. A. Alcocer Gamba, J. Carranza Madrigal, L. G.



867 González Salas, E. López Rosas, B. González Díaz, E. Salcido Vázquez, A. Nacoud Ackar, G.  
868 A. Llamas Esperón, C. R. Martínez Sánchez, M. Guerrero De Leon, R. Suarez Otero, G.  
869 Fanghänel Salmón, J. A. Pérez Ríos, J. A. Garza Ruíz, M. Alings, R. W. Breedveld, P. A. M.  
870 Hoogslag, H. Suryapranata, A. Oomen, J. J. Wiersma, R. M. A. Van Der Wal, P. S. Hooft Van  
871 Huysduynen-Monraats, I. Karalis, G. J. E. Verdel, B. R. G. Brueren, R. P. T. Troquay, E. P.  
872 Viergever, N. Y. Y. Al-Windy, G. L. Bartels, J. H. Cornel, W. R. M. Hermans, J. P. R. Herrman,  
873 R. J. Bos, R. Groutars, C. C. Van Der Zwaan, R. Kaplan, E. Ronner, B. E. Groenemeijer, P. N.  
874 A. Bronzwaer, A. A. H. Liem, B. Rensing, M. Bokern, R. Nijmeijer, F. Hersbach, F. F. Willems,  
875 A. T. M. Gosselink, J. Elliott, G. Wilkins, R. Fisher, D. Scott, H. Hart, R. Stewart, S. Harding, I.  
876 Ternouth, N. Fisher, D. Aitken, R. Anscombe, T. Tomala, O. Nygård, J. A. Sparby, K. Andersen,  
877 L. Gullestad, J. Jortveit, P. S. Munk, S. Halvorsen, U. Hurtig, R. M. Correa Flores, J. R.  
878 Calderon Ticona, J. R. Durand Velasquez, S. A. Negrón Miguel, E. S. Sanabria Perez, J. M.  
879 Carrion Chambilla, C. A. Chavez Ayala, R. P. Castillo Leon, R. J. Vargas Gonzales, J. D.  
880 Hernandez Zuniga, L. A. Camacho Cosavalente, J. E. Bravo Mannucci, N. C. Llerena Navarro,  
881 Y. M. Roldan Concha, V. E. Rodriguez Chavez, H. A. Anchante Hernandez, C. A. Zea Nunez,  
882 A. Ferrolino, R. A. G. Sy, L. Tirador, R. G. Sy, G. Matiga, R. M. Coching, A. Bernan, G. Rogelio,  
883 D. D. Morales, E. Tan, A. Wlodarczak, K. Jaworska, G. Skonieczny, L. Pawlowicz, P.  
884 Wojewoda, B. Busz-Papiez, J. Bednarski, A. Goch, P. Staneta, E. Dulak, A. Budaj, K. Saminski,  
885 W. Krasowski, W. Sudnik, A. Zurakowski, M. Skorski, R. Lysek, B. Miklaszewicz, J. Kubica, J. A.  
886 Lipko, E. Kostarska-Srokosz, M. Piepiorka, A. Drzewiecka, R. Sciborski, A. Stasiewski, T.  
887 Blicharski, L. Bystryk, M. Szpajer, M. Korol, T. Czernski, E. Mirek-Bryniarska, J. Gniot, A.  
888 Lubinski, J. Gorny, E. Franek, P. Monteiro, J. Mesquita Bastos, H. H. Pereira, D. Martins, J.  
889 Morais, F. Seixo, C. Mendonça, A. Botelho, B. Minescu, O. Istratoaie, D. N. Tesloianu, M.  
890 Dorobantu, G. Cristian, C. G. C. Podoleanu, M. C. A. Constantinescu, C. M. Bengus, C. Militaru,  
891 D. Rosu, I. R. Parepa, A. V. Matei, T. M. Alexandru, Y. Shvarts, O. Orlikova, Z. Kobalava, O. L.  
892 Barbarash, V. Markov, N. Lyamina, A. Gordienko, K. Zrazhevsky, A. Y. Vishnevsky, V.  
893 Gurevich, R. Stryuk, N. V. Lomakin, I. Bokarev, S. Shalaev, L. Khaisheva, P. Chizhov, I.  
894 Viktorova, N. Osokina, E. Akatova, G. Chumakova, I. Libov, M. I. Voevoda, T. V. Tretyakova, E.  
895 Baranov, S. Shustov, S. Yakushin, I. Gordeev, N. Khasanov, O. Reshetko, T. Sotnikova, O.  
896 Molchanova, K. Y. Nikolaev, L. Gapon, E. Baranova, Z. Shogenov, E. Kosmachova, Y. Karpov,  
897 A. Povzun, L. Egorova, V. V. Tyrenko, I. G. Ivanov, D. Simic, N. Ivanovic, G. Davidovic, N.  
898 Tasic, M. R. Asanin, S. Stojic, S. R. Apostolovic, S. Ilic, B. Putnikovic, A. Stankovic, A.  
899 Arandjelovic, S. Radovanovic, A. D. Ristic, J. Balinovac, D. V. Dincic, P. Seferovic, S. Dodic, S.  
900 Dimkovic, T. Chua, K. K. Poh, H. Y. Ong, K. Micko, J. Nociar, D. Pella, P. Fulop, M. Hranai, J.  
901 Palka, J. Mazur, I. Majercák, A. Dzapina, F. Fazekas, J. Gonsorcik, V. Bugan, J. Murin, J.  
902 Selecky, G. Kamensky, J. Strbova, R. Smik, A. Dukat, I. Žuran, J. Oklukar, N. C. Šuligoj, M.  
903 Cevc, L. Lipar, H. P. Cyster, N. Ranjith, C. Corbett, J. Bayat, E. M. Makotoko, I. E. Kapp, M. M.  
904 V. Basson, H. Lottering, L. J. Van Zyl, P. J. Sebastian, T. Pillay, J. A. Saaiman, P. J.  
905 Commerford, S. Cassimjee, I. O. Ebrahim, M. Sarvan, J. H. Mynhardt, A. J. Dalby, H. Reuter, R.  
906 Moodley, M. Vida, A. R. Cequier Fillat, V. Bodí Peris, F. Fuentes Jimenez, F. Marín, J. M. Cruz  
907 Fernández, B. Gil-Extremera, F. W. Diz, D. Garcia-Dorado, A. Iñiguez, J. Tuñón Fernández, J.  
908 R. Gonzalez-Juanatey, J. Fernandez Portales, F. Civeira Murillo, L. Matas Pericas, J. L.  
909 Zamorano, M. De Mora Martin, J. Bruguera Cortada, J. J. Alonso Martin, J. R. De Berrazueta  
910 Fernández, J. F. Díaz Fernández, J. A. García Lledó, J. Cosín Sales, J. Botas Rodriguez, G.  
911 Gusi Tragant, A. Benedicto, C. Gonzalez-Juanatey, M. Camprubí Potau, I. Plaza Perez, C. M.  
912 De La Tassa, P. Loma-Osorio Rincon, J. Balaguer Recena, J. M. Escudier, G. Constantine, R.  
913 Haniffa, N. Tissera, S. Amarasekera, N. Fernando, J. Jayawardena, W. Santharaj, R.  
914 Ekanayaka, S. Mendis, V. Senaratne, G. Mayurathan, T. Sirisena, A. Rajapaksha, J. I. Herath,  
915 N. Amarasena, S. Berglund, G. Rasmanis, E. Hagström, N. Witt, G. Mourtzinis, P. Nicol, O.  
916 Hansen, S. Romeo, S. A. Jensen, I. Torstensson, U. Ahreemark, T. Sundelin, T. Moccetti, C.  
917 Müller, F. Mach, R. Binder, C. E. Chiang, W. C. Tsai, K. C. Ueng, W. T. Lai, M. E. Liu, J. J.

918 Hwang, W. H. Yin, I. C. Hsieh, W. H. Lin, J. Y. Kuo, T. Y. Huang, C. Y. Fang, P. Kaewsuwanna,  
919 W. Soonfuang, W. Jintapakorn, A. Sukonthasarn, P. Sritara, N. Wongpraparut, K. Sastravaha,  
920 N. Sansanayudh, W. Kehasukcharoen, D. Piyayotai, A. Camsari, H. Kultursay, S. Guneri, B.  
921 Mutlu, M. Ersanli, M. Demirtas, C. Kirma, E. Ural, L. Koldas, O. Karpenko, A. Prokhorov, I.  
922 Vakaluyk, H. Myshanych, D. Reshotko, V. Batushkin, L. Rudenko, I. Kovalskyi, M. Kushnir, V.  
923 Tseluyko, Y. Mostovoy, M. Stanislavchuk, Y. Kyiak, Y. Karpenko, Y. Malynovsky, A. Klantsa, O.  
924 Kutniy, E. Amosova, V. Tashchuk, O. Leshchuk, A. Parkhomenko, M. Rishko, M. Kopytsya, A.  
925 Yagensky, M. Vatutin, A. Bagriy, O. M. Barna, O. Ushakov, G. Dzyak, B. Goloborodko, A.  
926 Rudenko, J. Trevelyan, A. Zaman, K. Lee, A. Moriarty, R. K. Aggarwal, P. Clifford, Y. K. Wong,  
927 S. M. R. Iqbal, E. Subkovas, D. Braganza, D. Sarkar, R. Storey, H. Griffiths, S. McClure, R.  
928 Muthusamy, J. Kurian, T. Levy, C. Barr, H. Kadr, R. Gerber, A. Simaitis, H. Soran, A. Mathur, A.  
929 Brodison, R. Oliver, T. Mudawi, T. Reynolds, D. Sharman, R. Butler, P. Wilkinson, G. Y. H. Lip,  
930 J. Halcox, G. Vardi, D. Baldari, D. Brabham, C. Treasure, C. Dahl, B. Palmer, A. Wiseman, S.  
931 Puri, A. E. Mohart, C. Ince, E. Flores, S. Wright, S. C. Cheng, M. Rosenberg, W. Rogers, E.  
932 Kosinski, L. Forgosh, J. Waltman, M. Khan, M. Shoukfeh, G. Dagher, I. Lieber, P. Kumar, C.  
933 East, P. Krichmar, L. White, T. Knickelbine, T. Haldis, E. Gillespie, D. Suh, I. Arif, F. Akhter, E.  
934 Carlson, M. D'Urso, F. El-Ahdab, W. Nelson, B. Harris, S. Cohen, L. Carter, K. Sabatino, T.  
935 Haddad, A. Malik, S. Rao, A. Mulkay, I. Jovin, K. Klancke, V. Malhotra, S. K. Devarapalli, M.  
936 Koren, H. Chandna, G. Dodds, M. Janik, J. Moran, A. Sumner, J. Kobayashi, W. Davis, S.  
937 Yazdani, J. Pasquini, M. Thakkar, A. Vedere, W. Leimbach, J. Rider, N. Singh, A. V. Shah, P.  
938 M. Moriarty, D. Janosik, C. Pepine, B. Berman, J. Gelormini, C. Daniels, F. Keating, N. I. Kondo,  
939 S. Shetty, W. Waider, T. Takata, M. Abu-Fadel, V. Shah, R. Aggarwal, M. Izzo, A. Kumar, B.  
940 Hattler, C. Link, A. Bortnick, G. Kinzfolg, A. Ghitis, J. Larry, E. Teufel, P. Kuhlman, B. Mclaurin,  
941 W. Zhang, S. Thew, J. Abbas, M. White, N. Ranadive, C. Gring, D. Henderson, T. Schuchard,  
942 N. Farhat, G. Kline, S. Mahal, J. Whitaker, S. Speirs, R. Andersen, N. Daboul, P. Horwitz, Z.  
943 Jafar, J. MCGarvey, V. Panchal, S. Voyce, T. Blok, W. Sheldon, M. M. Azizad, C. Schmalfuss, M.  
944 Picone, W. Herzog, J. Lindsey, R. Nowins, N. Lepor, M. El Shahawy, H. Weintraub, A. Irimpen,  
945 W. May, T. Galski, A. Chu, F. Mody, Z. Hodes, J. Fairlamb, C. Lambert, A. Raisinghani, A.  
946 Abbate, M. King, C. Carey, J. Gerber, L. Younis, H. T. Park, M. Vidovich, T. Knutson, D.  
947 Friedman, F. Chaleff, A. Loussarian, C. Kimmelstiel, K. Silver, M. Foster, G. Tonnessen, M.  
948 Amlani, A. Wali, C. Malozzi, K. Wattanakit, P. J. O'Donnell, D. Singal, N. Jaffrani, S. Banuru, D.  
949 Fisher, M. Xenakis, N. Perlmutter, R. Bhagwat, J. Strader, A. Akyea-Djamson, A. Labroo, H. J.  
950 Marais, E. Claxton, M. Berk, P. Rossi, P. Joshi, A. S. Khaira, G. Kumkumian, S. Lupovitch, J.  
951 Purow, S. Welka, D. Hoffman, S. Fischer, E. Soroka, D. Eagerton, S. Pancholy, M. Ray, M.  
952 Farrar, S. Pollock, W. J. French, S. Diamantis, L. Gimple, S. Schwartz, E. Pereira, D. Spriggs, J.  
953 Strain, A. Vo, M. Chane, J. Hall, N. Vijay, K. Lotun, F. M. Lester, A. Nahhas, T. Pope, P. Nager,  
954 R. Vohra, R. Bashir, H. Ahmed, M. Berlowitz, R. Fishberg, R. Barrucco, E. Yang, M. Radin, D.  
955 Sporn, S. Eisenberg, J. Landzberg, M. MCGough, S. Turk, M. Schwartz, P. S. Sundram, D. Jain,  
956 M. Zainea, C. Bayron, R. Karlsberg, H. Lui, W. Keen, D. Westerhausen, S. Khurana, H.  
957 Agarwal, J. Bircherm, W. Penny, M. Chang, J. M. Gilbert, G. Chalavarya, C. Eaton, J. F.  
958 Schmedtje, S. Christenson, D. Denham, A. Macdonell, P. Gibson, A. Rahman, T. Al Joundi, G.  
959 Conrad, P. Kotha, M. Love, G. Giesler, H. Rubenstein, L. Akright, B. Schifferdecker, J.  
960 Krawczyk, T. Wells, J. Welker, R. Foster, R. Gilmore, J. Anderson, D. Jacoby, G. Gardner, R.  
961 Dandillaya, K. Vora, J. Kostis, J. Hunter, D. Laxson, E. Ball, Alirocumab and cardiovascular  
962 outcomes after acute coronary syndrome, *N. Engl. J. Med.* (2018),  
963 doi:10.1056/NEJMoa1801174.  
964 7. M. S. Sabatine, R. P. Giugliano, A. C. Keech, N. Honarpour, S. D. Wiviott, S. A. Murphy, J. F.  
965 Kuder, H. Wang, T. Liu, S. M. Wasserman, P. S. Sever, T. R. Pedersen, FOURIER Steering  
966 Committee and Investigators, Evolocumab and Clinical Outcomes in Patients with  
967 Cardiovascular Disease, *N. Engl. J. Med.* **376**, 1713–1722 (2017).  
968 8. C. Ma, M. E. Gurol, Z. Huang, A. H. Lichtenstein, X. Wang, Y. Wang, S. Neumann, S. Wu, X.



- 969 Gao, Low-density lipoprotein cholesterol and risk of intracerebral hemorrhage, *Neurology*  
970 (2019), doi:10.1212/WNL.0000000000007853.
- 971 9. M. S. Sabatine, S. D. Wiviott, K. Im, S. A. Murphy, R. P. Giugliano, Efficacy and safety of  
972 further lowering of low-density lipoprotein cholesterol in patients starting with very low levels: A  
973 meta-analysis, *JAMA Cardiol.* (2018), doi:10.1001/jamacardio.2018.2258.
- 974 10. R. P. Giugliano, T. R. Pedersen, J.-G. Park, G. M. De Ferrari, Z. A. Gaciong, R. Ceska, K.  
975 Toth, I. Gouni-Berthold, J. Lopez-Miranda, F. Schiele, F. Mach, B. R. Ott, E. Kanevsky, A. L.  
976 Pineda, R. Somaratne, S. M. Wasserman, A. C. Keech, P. S. Sever, M. S. Sabatine, FOURIER  
977 Investigators, Clinical efficacy and safety of achieving very low LDL-cholesterol concentrations  
978 with the PCSK9 inhibitor evolocumab: a prespecified secondary analysis of the FOURIER trial,  
979 *Lancet* **390**, 1962–1971 (2017).
- 980 11. A. Taylor, D. Wang, K. Patel, R. Whittall, G. Wood, M. Farrer, R. D. Neely, S. Fairgrieve, D.  
981 Nair, M. Barbir, J. L. Jones, S. Egan, R. Everdale, Y. Lolin, E. Hughes, J. A. Cooper, S. G.  
982 Hadfield, G. Norbury, S. E. Humphries, Mutation detection rate and spectrum in familial  
983 hypercholesterolaemia patients in the UK pilot cascade project, *Clin. Genet.* **77**, 572–580  
984 (2010).
- 985 12. A. Garg, S. Fazio, P. B. Duell, A. Baass, C. Udata, T. Joh, T. Riel, M. Sirota, D. Dettling, H.  
986 Liang, P. D. Garzone, B. Gumbiner, H. Wan, Molecular Characterization of Familial  
987 Hypercholesterolemia in a North American Cohort, *J. Endocr. Soc.* (2019),  
988 doi:10.1210/jendso/bvz015.
- 989 13. L. A. Gilbert, M. A. Horlbeck, B. Adamson, J. E. Villalta, Y. Chen, E. H. Whitehead, C.  
990 Guimaraes, B. Panning, H. L. Ploegh, M. C. Bassik, L. S. Qi, M. Kampmann, J. S. Weissman,  
991 Genome-Scale CRISPR-Mediated Control of Gene Repression and Activation, *Cell* **159**, 647–  
992 661 (2014).
- 993 14. M. A. Horlbeck, L. A. Gilbert, J. E. Villalta, B. Adamson, R. A. Pak, Y. Chen, A. P. Fields, C.  
994 Y. Park, J. E. Corn, M. Kampmann, J. S. Weissman, Compact and highly active next-generation  
995 libraries for CRISPR-mediated gene repression and activation., *Elife* **5** (2016),  
996 doi:10.7554/eLife.19760.
- 997 15. B. Adamson, T. M. Norman, M. Jost, M. Y. Cho, J. K. Nuñez, Y. Chen, J. E. Villalta, L. A.  
998 Gilbert, M. A. Horlbeck, M. Y. Hein, R. A. Pak, A. N. Gray, C. A. Gross, A. Dixit, O. Parnas, A.  
999 Regev, J. S. Weissman, A Multiplexed Single-Cell CRISPR Screening Platform Enables  
1000 Systematic Dissection of the Unfolded Protein Response., *Cell* **167**, 1867-1882.e21 (2016).
- 1001 16. K. K. Ray, R. S. Wright, D. Kallend, W. Koenig, L. A. Leiter, F. J. Raal, J. A. Bisch, T.  
1002 Richardson, M. Jaros, P. L. J. Wijngaard, J. J. P. Kastelein, Two phase 3 trials of inclisiran in  
1003 patients with elevated LDL cholesterol, *N. Engl. J. Med.* (2020), doi:10.1056/NEJMoa1912387.
- 1004 17. B. B. Knowles, C. C. Howe, D. P. Aden, Human hepatocellular carcinoma cell lines secrete  
1005 the major plasma proteins and hepatitis B surface antigen, *Science* (80-. ). (1980),  
1006 doi:10.1126/science.6248960.
- 1007 18. M. A. Mandegar, N. Huebsch, E. B. Frolov, E. Shin, A. Truong, M. P. Olvera, A. H. Chan, Y.  
1008 Miyaoka, K. Holmes, C. I. Spencer, L. M. Judge, D. E. Gordon, T. V. Eskildsen, J. E. Villalta, M.  
1009 A. Horlbeck, L. A. Gilbert, N. J. Krogan, S. P. Sheikh, J. S. Weissman, L. S. Qi, P. L. So, B. R.  
1010 Conklin, CRISPR Interference Efficiently Induces Specific and Reversible Gene Silencing in  
1011 Human iPSCs, *Cell Stem Cell* (2016), doi:10.1016/j.stem.2016.01.022.
- 1012 19. A. W. Alberts, J. Chen, G. Kuron, V. Hunt, J. Huff, C. Hoffman, J. Rothrock, M. Lopez, H.  
1013 Joshua, E. Harris, A. Patchett, R. Monaghan, S. Currie, E. Stapley, G. Albers-Schonberg, O.  
1014 Hensens, J. Hirshfield, K. Hoogsteen, J. Liesch, J. Springer, Mevinolin: A highly potent  
1015 competitive inhibitor of hydroxymethylglutaryl-coenzyme A reductase and a cholesterol-lowering  
1016 agent, *Proc. Natl. Acad. Sci. U. S. A.* (1980), doi:10.1073/pnas.77.7.3957.
- 1017 20. M. S. Brown, J. R. Faust, J. L. Goldstein, I. Kaneko, A. Endo, Induction of 3-hydroxy-3-  
1018 methylglutaryl coenzyme A reductase activity in human fibroblasts incubated with compactin  
1019 (ML-236B), a competitive inhibitor of the reductase, *J. Biol. Chem.* (1978).

- 1020 21. S. Benjannet, D. Rhainds, R. Essalmani, J. Mayne, L. Wickham, W. Jin, M.-C. Asselin, J.  
1021 Hamelin, M. Varret, D. Allard, M. Trillard, M. Abifadel, A. Tebon, A. D. Attie, D. J. Rader, C.  
1022 Boileau, L. Brissette, M. Chrétien, A. Prat, N. G. Seidah, NARC-1/PCSK9 and its natural  
1023 mutants: zymogen cleavage and effects on the low density lipoprotein (LDL) receptor and LDL  
1024 cholesterol., *J. Biol. Chem.* **279**, 48865–75 (2004).
- 1025 22. S. Rashid, D. E. Curtis, R. Garuti, N. N. Anderson, Y. Bashmakov, Y. K. Ho, R. E. Hammer,  
1026 Y. A. Moon, J. D. Horton, Decreased plasma cholesterol and hypersensitivity to statins in mice  
1027 lacking Pcsk9, *Proc. Natl. Acad. Sci. U. S. A.* **102**, 5374–5379 (2005).
- 1028 23. J. C. Chan, D. E. Piper, Q. Cao, D. Liu, C. King, W. Wang, J. Tang, Q. Liu, J. Higbee, Z. Xia,  
1029 Y. Di, S. Shetterly, Z. Arimura, H. Salomonis, W. G. Romanow, S. T. Thibault, R. Zhang, P.  
1030 Cao, X. P. Yang, T. Yu, M. Lu, M. W. Retter, G. Kwon, K. Henne, O. Pan, M. M. Tsai, B.  
1031 Fuchslocher, E. Yang, L. Zhou, K. J. Lee, M. Daris, J. Sheng, Y. Wang, W. D. Shen, W. C. Yeh,  
1032 M. Emery, N. P. Walker, B. Shan, M. Schwarz, S. M. Jackson, A proprotein convertase  
1033 subtilisin/kexin type 9 neutralizing antibody reduces serum cholesterol in mice and nonhuman  
1034 primates, *Proc. Natl. Acad. Sci. U. S. A.* **106**, 9820–9825 (2009).
- 1035 24. P. Aisen, Transferrin receptor 1., *Int. J. Biochem. Cell Biol.* **36**, 2137–43 (2004).
- 1036 25. R. Coffey, T. Ganz, Iron homeostasis: An anthropocentric perspective, *J. Biol. Chem.* **292**,  
1037 12727–12734 (2017).
- 1038 26. N. Zelcer, C. Hong, R. Boyadjian, P. Tontonoz, LXR regulates cholesterol uptake through  
1039 Idol-dependent ubiquitination of the LDL receptor, *Science* **325**, 100–104 (2009).
- 1040 27. M. Yoshinaga, Y. Nakatsuka, A. Vandenbon, D. Ori, T. Uehata, T. Tsujimura, Y. Suzuki, T.  
1041 Mino, O. Takeuchi, Regnase-1 Maintains Iron Homeostasis via the Degradation of Transferrin  
1042 Receptor 1 and Prolyl-Hydroxylase-Domain-Containing Protein 3 mRNAs, *Cell Rep.* (2017),  
1043 doi:10.1016/j.celrep.2017.05.009.
- 1044 28. H. Mi, A. Muruganujan, D. Ebert, X. Huang, P. D. Thomas, PANTHER version 14: more  
1045 genomes, a new PANTHER GO-slim and improvements in enrichment analysis tools, *Nucleic  
1046 Acids Res.* **47**, D419–D426 (2019).
- 1047 29. T. M. Teslovich, K. Musunuru, A. V. Smith, A. C. Edmondson, I. M. Stylianou, M. Koseki, J.  
1048 P. Pirruccello, S. Ripatti, D. I. Chasman, C. J. Willer, C. T. Johansen, S. W. Fouchier, A. Isaacs,  
1049 G. M. Peloso, M. Barbalic, S. L. Ricketts, J. C. Bis, Y. S. Aulchenko, G. Thorleifsson, M. F.  
1050 Feitosa, J. Chambers, M. Orho-Melander, O. Melander, T. Johnson, X. Li, X. Guo, M. Li, Y. Shin  
1051 Cho, M. Jin Go, Y. Jin Kim, J.-Y. Lee, T. Park, K. Kim, X. Sim, R. Twee-Hee Ong, D. C.  
1052 Croteau-Chonka, L. A. Lange, J. D. Smith, K. Song, J. Hua Zhao, X. Yuan, J. Luan, C. Lamina,  
1053 A. Ziegler, W. Zhang, R. Y. L. Zee, A. F. Wright, J. C. M. Witteman, J. F. Wilson, G. Willemsen,  
1054 H.-E. Wichmann, J. B. Whitfield, D. M. Waterworth, N. J. Wareham, G. Waeber, P.  
1055 Vollenweider, B. F. Voight, V. Vitart, A. G. Uitterlinden, M. Uda, J. Tuomilehto, J. R. Thompson,  
1056 T. Tanaka, I. Surakka, H. M. Stringham, T. D. Spector, N. Soranzo, J. H. Smit, J. Sinisalo, K.  
1057 Silander, E. J. G. Sijbrands, A. Scuteri, J. Scott, D. Schlessinger, S. Sanna, V. Salomaa, J.  
1058 Saharinen, C. Sabatti, A. Ruukonen, I. Rudan, L. M. Rose, R. Roberts, M. Rieder, B. M. Psaty,  
1059 P. P. Pramstaller, I. Pichler, M. Perola, B. W. J. H. Penninx, N. L. Pedersen, C. Pattaro, A. N.  
1060 Parker, G. Pare, B. A. Oostra, C. J. O'Donnell, M. S. Nieminen, D. A. Nickerson, G. W.  
1061 Montgomery, T. Meitinger, R. McPherson, M. I. McCarthy, W. McArdle, D. Masson, N. G.  
1062 Martin, F. Marroni, M. Mangino, P. K. E. Magnusson, G. Lucas, R. Luben, R. J. F. Loos, M.-L.  
1063 Lokki, G. Lettre, C. Langenberg, L. J. Launer, E. G. Lakatta, R. Laaksonen, K. O. Kyvik, F.  
1064 Kronenberg, I. R. König, K.-T. Khaw, J. Kaprio, L. M. Kaplan, Å. Johansson, M.-R. Jarvelin, A.  
1065 Cecile J. W. Janssens, E. Ingelsson, W. Igl, G. Kees Hovingh, J.-J. Hottenga, A. Hofman, A. A.  
1066 Hicks, C. Hengstenberg, I. M. Heid, C. Hayward, A. S. Havulinna, N. D. Hastie, T. B. Harris, T.  
1067 Haritunians, A. S. Hall, U. Gyllensten, C. Guiducci, L. C. Groop, E. Gonzalez, C. Gieger, N. B.  
1068 Freimer, L. Ferrucci, J. Erdmann, P. Elliott, K. G. Ejebe, A. Döring, A. F. Dominiczak, S.  
1069 Demissie, P. Deloukas, E. J. C. de Geus, U. de Faire, G. Crawford, F. S. Collins, Y. I. Chen, M.  
1070 J. Caulfield, H. Campbell, N. P. Burt, L. L. Bonnycastle, D. I. Boomsma, S. M. Boekholdt, R. N.

1071 Bergman, I. Barroso, S. Bandinelli, C. M. Ballantyne, T. L. Assimes, T. Quertermous, D.  
1072 Altshuler, M. Seielstad, T. Y. Wong, E.-S. Tai, A. B. Feranil, C. W. Kuzawa, L. S. Adair, H. A.  
1073 Taylor Jr, I. B. Borecki, S. B. Gabriel, J. G. Wilson, H. Holm, U. Thorsteinsdottir, V. Gudnason,  
1074 R. M. Krauss, K. L. Mohlke, J. M. Ordovas, P. B. Munroe, J. S. Kooner, A. R. Tall, R. A. Hegele,  
1075 J. J. P. Kastelein, E. E. Schadt, J. I. Rotter, E. Boerwinkle, D. P. Strachan, V. Mooser, K.  
1076 Stefansson, M. P. Reilly, N. J. Samani, H. Schunkert, L. A. Cupples, M. S. Sandhu, P. M.  
1077 Ridker, D. J. Rader, C. M. van Duijn, L. Peltonen, G. R. Abecasis, M. Boehnke, S. Kathiresan,  
1078 Biological, clinical and population relevance of 95 loci for blood lipids, *Nature* **466**, 707–713  
1079 (2010).

1080 30. P. Natarajan, G. M. Peloso, S. M. Zekavat, M. Montasser, A. Ganna, M. Chaffin, A. V.  
1081 Khera, W. Zhou, J. M. Bloom, J. M. Engreitz, J. Ernst, J. R. O’Connell, S. E. Ruotsalainen, M.  
1082 Alver, A. Manichaikul, W. C. Johnson, J. A. Perry, T. Poterba, C. Seed, I. L. Surakka, T. Esko,  
1083 S. Ripatti, V. Salomaa, A. Correa, R. S. Vasani, M. Kellis, B. M. Neale, E. S. Lander, G.  
1084 Abecasis, B. Mitchell, S. S. Rich, J. G. Wilson, L. A. Cupples, J. I. Rotter, C. J. Willer, S.  
1085 Kathiresan, NHLBI TOPMed Lipids Working Group, Deep-coverage whole genome sequences  
1086 and blood lipids among 16,324 individuals, *Nat. Commun.* **9**, 3391 (2018).

1087 31. D. J. Liu, G. M. Peloso, H. Yu, A. S. Butterworth, X. Wang, A. Mahajan, D. Saleheen, C.  
1088 Emdin, D. Alam, A. C. Alves, P. Amouyel, E. Di Angelantonio, D. Arveiler, T. L. Assimes, P. L.  
1089 Auer, U. Baber, C. M. Ballantyne, L. E. Bang, M. Benn, J. C. Bis, M. Boehnke, E. Boerwinkle, J.  
1090 Bork-Jensen, E. P. Bottinger, I. Brandslund, M. Brown, F. Busonero, M. J. Caulfield, J. C.  
1091 Chambers, D. I. Chasman, Y. E. Chen, Y.-D. I. Chen, R. Chowdhury, C. Christensen, A. Y. Chu,  
1092 J. M. Connell, F. Cucca, L. A. Cupples, S. M. Damrauer, G. Davies, I. J. Deary, G. Dedoussis, J.  
1093 C. Denny, A. Dominiczak, M.-P. Dubé, T. Ebeling, G. Eiriksdottir, T. Esko, A.-E. Farmaki, M. F.  
1094 Feitosa, M. Ferrario, J. Ferrieres, I. Ford, M. Fornage, P. W. Franks, T. M. Frayling, R. Frikke-  
1095 Schmidt, L. G. Fritsche, P. Frossard, V. Fuster, S. K. Ganesh, W. Gao, M. E. Garcia, C. Gieger,  
1096 F. Giulianini, M. O. Goodarzi, H. Grallert, N. Grarup, L. Groop, M. L. Grove, V. Gudnason, T.  
1097 Hansen, T. B. Harris, C. Hayward, J. N. Hirschhorn, O. L. Holmen, J. Huffman, Y. Huo, K.  
1098 Hveem, S. Jabeen, A. U. Jackson, J. Jakobsdottir, M.-R. Jarvelin, G. B. Jensen, M. E.  
1099 Jørgensen, J. W. Jukema, J. M. Justesen, P. R. Kamstrup, S. Kanoni, F. Karpe, F. Kee, A. V.  
1100 Khera, D. Klarin, H. A. Koistinen, J. S. Kooner, C. Kooperberg, K. Kuulasmaa, J. Kuusisto, M.  
1101 Laakso, T. Lakka, C. Langenberg, A. Langsted, L. J. Launer, T. Lauritzen, D. C. M. Liewald, L.  
1102 A. Lin, A. Linneberg, R. J. F. Loos, Y. Lu, X. Lu, R. Mägi, A. Malarstig, A. Manichaikul, A. K.  
1103 Manning, P. Mäntyselkä, E. Marouli, N. G. D. Masca, A. Maschio, J. B. Meigs, O. Melander, A.  
1104 Metspalu, A. P. Morris, A. C. Morrison, A. Mulas, M. Müller-Nurasyid, P. B. Munroe, M. J.  
1105 Neville, J. B. Nielsen, S. F. Nielsen, B. G. Nordestgaard, J. M. Ordovas, R. Mehran, C. J.  
1106 O’Donnell, M. Orho-Melander, C. M. Olsson, P. Muntendam, S. Padmanabhan, C. N. A.  
1107 Palmer, D. Pasko, A. P. Patel, O. Pedersen, M. Perola, A. Peters, C. Pisinger, G. Pistis, O.  
1108 Polasek, N. Poulter, B. M. Psaty, D. J. Rader, A. Rasheed, R. Rauramaa, D. F. Reilly, A. P.  
1109 Reiner, F. Renström, S. S. Rich, P. M. Ridker, J. D. Rioux, N. R. Robertson, D. M. Roden, J. I.  
1110 Rotter, I. Rudan, V. Salomaa, N. J. Samani, S. Sanna, N. Sattar, E. M. Schmidt, R. A. Scott, P.  
1111 Sever, R. S. Sevilla, C. M. Shaffer, X. Sim, S. Sivapalaratnam, K. S. Small, A. V. Smith, B. H.  
1112 Smith, S. Somayajula, L. Southam, T. D. Spector, E. K. Speliotes, J. M. Starr, K. E. Stirrups, N.  
1113 Stitzel, K. Strauch, H. M. Stringham, P. Surendran, H. Tada, A. R. Tall, H. Tang, J.-C. Tardif, K.  
1114 D. Taylor, S. Trompet, P. S. Tsao, J. Tuomilehto, A. Tybjaerg-Hansen, N. R. van Zuydam, A.  
1115 Varbo, T. V. Varga, J. Virtamo, M. Waldenberger, N. Wang, N. J. Wareham, H. R. Warren, P. E.  
1116 Weeke, J. Weinstock, J. Wessel, J. G. Wilson, P. W. F. Wilson, M. Xu, H. Yaghootkar, R.  
1117 Young, E. Zeggini, H. Zhang, N. S. Zheng, W. Zhang, Y. Zhang, W. Zhou, Y. Zhou, M.  
1118 Zoledziowska, J. M. M. Howson, J. Danesh, M. I. McCarthy, C. A. Cowan, G. Abecasis, P.  
1119 Deloukas, K. Musunuru, C. J. Willer, S. Kathiresan, G. Abecasis, P. Deloukas, K. Musunuru, C.  
1120 J. Willer, S. Kathiresan, Exome-wide association study of plasma lipids in >300,000  
1121 individuals, *Nat. Genet.* **49**, 1758–1766 (2017).

- 1122 32. C. Bycroft, C. Freeman, D. Petkova, G. Band, L. T. Elliott, K. Sharp, A. Motyer, D. Vukcevic,  
1123 O. Delaneau, J. O'Connell, A. Cortes, S. Welsh, A. Young, M. Effingham, G. McVean, S. Leslie,  
1124 N. Allen, P. Donnelly, J. Marchini, The UK Biobank resource with deep phenotyping and  
1125 genomic data, *Nature* (2018), doi:10.1038/s41586-018-0579-z.
- 1126 33. A. Loregger, J. K. Nelson, N. Zelcer, in *Methods in molecular biology (Clifton, N.J.)*, (2017),  
1127 vol. 1583, pp. 53–63.
- 1128 34. A. Mazein, S. Watterson, W. Y. Hsieh, W. J. Griffiths, P. Ghazal, A comprehensive machine-  
1129 readable view of the mammalian cholesterol biosynthesis pathway, *Biochem. Pharmacol.*  
1130 (2013), doi:10.1016/j.bcp.2013.03.021.
- 1131 35. R. B. Rose, J. H. Bayle, J. A. Endrizzi, J. D. Cronk, G. R. Crabtree, T. Alber, Structural basis  
1132 of dimerization, coactivator recognition and MODY3 mutations in HNF-1 $\alpha$ , *Nat. Struct. Biol.*  
1133 (2000), doi:10.1038/78966.
- 1134 36. A. Delaforest, F. Di Furio, R. Jing, A. Ludwig-Kubinski, K. Twaroski, A. Urick, K. Pulakanti,  
1135 S. Rao, S. A. Duncan, HNF4A regulates the formation of hepatic progenitor cells from human  
1136 iPSC-derived endoderm by facilitating efficient recruitment of RNA pol II, *Genes (Basel)*. (2019),  
1137 doi:10.3390/genes10010021.
- 1138 37. K. Wang, A. X. Holterman, Pathophysiologic role of hepatocyte nuclear factor 6 *Cell. Signal.*  
1139 (2012), doi:10.1016/j.cellsig.2011.08.009.
- 1140 38. U. Wellner, J. Schubert, U. C. Burk, O. Schmalhofer, F. Zhu, A. Sonntag, B. Waldvogel, C.  
1141 Vannier, D. Darling, A. Zur Hausen, V. G. Brunton, J. Morton, O. Sansom, J. Schüler, M. P.  
1142 Stemmler, C. Herzberger, U. Hopt, T. Keck, S. Brabletz, T. Brabletz, The EMT-activator ZEB1  
1143 promotes tumorigenicity by repressing stemness-inhibiting microRNAs, *Nat. Cell Biol.* (2009),  
1144 doi:10.1038/ncb1998.
- 1145 39. C. L. Gao, J. G. Zhu, Y. P. Zhao, X. H. Chen, C. B. Ji, C. M. Zhang, C. Zhu, Z. K. Xia, Y. Z.  
1146 Peng, X. R. Guo, Mitochondrial dysfunction is induced by the overexpression of UCP4 in 3T3-L1  
1147 adipocytes, *Int. J. Mol. Med.* (2010), doi:10.3892/ijmm\_00000315.
- 1148 40. F. Quazi, R. S. Molday, Differential phospholipid substrates and directional transport by  
1149 ATP-binding cassette proteins ABCA1, ABCA7, and ABCA4 and disease-causing mutants, *J.*  
1150 *Biol. Chem.* (2013), doi:10.1074/jbc.M113.508812.
- 1151 41. J. E. Kung, N. Jura, The pseudokinase TRIB 1 toggles an intramolecular switch to regulate  
1152 COP 1 nuclear export, *EMBO J.* (2019), doi:10.15252/embj.201899708.
- 1153 42. J. M. Murphy, Y. Nakatani, S. A. Jamieson, W. Dai, I. S. Lucet, P. D. Mace, Molecular  
1154 Mechanism of CCAAT-Enhancer Binding Protein Recruitment by the TRIB1 Pseudokinase,  
1155 *Structure* (2015), doi:10.1016/j.str.2015.08.017.
- 1156 43. S. Soubeyrand, A. Martinuk, R. McPherson, TRIB1 is a positive regulator of hepatocyte  
1157 nuclear factor 4-Alpha, *Sci. Rep.* (2017), doi:10.1038/s41598-017-05768-1.
- 1158 44. R. C. Bauer, M. Sasaki, D. M. Cohen, J. Cui, M. A. Smith, B. O. Yenilmez, D. J. Steger, D. J.  
1159 Rader, Tribbles-1 regulates hepatic lipogenesis through posttranscriptional regulation of  
1160 C/EBP $\alpha$ , *J. Clin. Invest.* (2015), doi:10.1172/JCI77095.
- 1161 45. R. Burkhardt, S. A. Toh, W. R. Lagor, A. Birkeland, M. Levin, X. Li, M. Robblee, V. D.  
1162 Fedorov, M. Yamamoto, T. Satoh, S. Akira, S. Kathiresan, J. L. Breslow, D. J. Rader, Trib1 is a  
1163 lipid- and myocardial infarction-associated gene that regulates hepatic lipogenesis and VLDL  
1164 production in mice, *J. Clin. Invest.* **120**, 4410–4414 (2010).
- 1165 46. A. Motley, N. A. Bright, M. N. J. Seaman, M. S. Robinson, Clathrin-mediated endocytosis in  
1166 AP-2-depleted cells, *J. Cell Biol.* (2003), doi:10.1083/jcb.200305145.
- 1167 47. S. F. Parsons, G. Mallinson, C. H. Holmes, J. M. Houlihan, K. L. Simpson, W. J. Mawby, N.  
1168 K. Spurr, D. Warne, A. N. Barclay, D. J. Anstee, The Lutheran blood group glycoprotein, another  
1169 member of the immunoglobulin superfamily, is widely expressed in human tissues and is  
1170 developmentally regulated in human liver, *Proc. Natl. Acad. Sci. U. S. A.* (1995),  
1171 doi:10.1073/pnas.92.12.5496.
- 1172 48. S. K. Mishra, P. A. Keyel, M. A. Edeling, A. L. Dupin, D. J. Owen, L. M. Traub, Functional



- 1173 dissection of an AP-2  $\beta 2$  appendage-binding sequence within the autosomal recessive  
1174 hypercholesterolemia protein, *J. Biol. Chem.* (2005), doi:10.1074/jbc.M501029200.
- 1175 49. A. Radhakrishnan, J. L. Goldstein, J. G. McDonald, M. S. Brown, Switch-like Control of  
1176 SREBP-2 Transport Triggered by Small Changes in ER Cholesterol: A Delicate Balance, *Cell*  
1177 *Metab.* (2008), doi:10.1016/j.cmet.2008.10.008.
- 1178 50. J. D. Horton, N. A. Shah, J. A. Warrington, N. N. Anderson, S. W. Park, M. S. Brown, J. L.  
1179 Goldstein, Combined analysis of oligonucleotide microarray data from transgenic and knockout  
1180 mice identifies direct SREBP target genes., *Proc. Natl. Acad. Sci. U. S. A.* **100**, 12027–32  
1181 (2003).
- 1182 51. Scandinavian Simvastatin Survival Study Group, Randomised trial of cholesterol lowering in  
1183 4444 patients with coronary heart disease: the Scandinavian Simvastatin Survival Study (4S),  
1184 *Lancet* (1994), doi:10.1016/S0140-6736(94)90566-5.
- 1185 52. N. G. Lintner, K. F. McClure, D. Petersen, A. T. Londregan, D. W. Piotrowski, L. Wei, J.  
1186 Xiao, M. Bolt, P. M. Loria, B. Maguire, K. F. Geoghegan, A. Huang, T. Rolph, S. Liras, J. A.  
1187 Doudna, R. G. Dullea, J. H. D. Cate, C. Khosla, Ed. Selective stalling of human translation  
1188 through small-molecule engagement of the ribosome nascent chain., *PLoS Biol.* **15**, e2001882  
1189 (2017).
- 1190 53. W. Li, F. R. Ward, K. F. McClure, S. T.-L. Chang, E. Montabana, S. Liras, R. G. Dullea, J. H.  
1191 D. Cate, Structural basis for selective stalling of human ribosome nascent chain complexes by a  
1192 drug-like molecule, *Nat. Struct. Mol. Biol.* **26**, 501–509 (2019).
- 1193 54. T. Suzuki, M. Terasaki, C. Takemoto-Hori, T. Hanada, T. Ueda, A. Wada, K. Watanabe,  
1194 Structural compensation for the deficit of rRNA with proteins in the mammalian mitochondrial  
1195 ribosome. Systematic analysis of protein components of the large ribosomal subunit from  
1196 mammalian mitochondria, *J. Biol. Chem.* (2001), doi:10.1074/jbc.M100432200.
- 1197 55. P. J. Thul, L. Akesson, M. Wiking, D. Mahdessian, A. Geladaki, H. Ait Blal, T. Alm, A.  
1198 Asplund, L. Björk, L. M. Breckels, A. Bäckström, F. Danielsson, L. Fagerberg, J. Fall, L. Gatto,  
1199 C. Gnann, S. Hober, M. Hjelmare, F. Johansson, S. Lee, C. Lindskog, J. Mulder, C. M. Mulvey,  
1200 P. Nilsson, P. Oksvold, J. Rockberg, R. Schutten, J. M. Schwenk, A. Sivertsson, E. Sjöstedt, M.  
1201 Skogs, C. Stadler, D. P. Sullivan, H. Tegel, C. Winsnes, C. Zhang, M. Zwahlen, A. Mardinoglu,  
1202 F. Pontén, K. Von Feilitzen, K. S. Lilley, M. Uhlén, E. Lundberg, A subcellular map of the human  
1203 proteome, *Science (80-. )*. (2017), doi:10.1126/science.aal3321.
- 1204 56. H. Li, B. Dong, S. W. Park, H.-S. Lee, W. Chen, J. Liu, Hepatocyte nuclear factor 1alpha  
1205 plays a critical role in PCSK9 gene transcription and regulation by the natural  
1206 hypocholesterolemic compound berberine., *J. Biol. Chem.* **284**, 28885–95 (2009).
- 1207 57. A.-X. Guo, J.-J. Cui, L.-Y. Wang, J.-Y. Yin, The role of CSDE1 in translational  
1208 reprogramming and human diseases, *Cell Commun. Signal.* **18**, 14 (2020).
- 1209 58. M. Dinur, R. Kilav, A. Sela-Brown, H. Jacquemin-Sablon, T. Naveh-Many, In vitro evidence  
1210 that upstream of N-ras participates in the regulation of parathyroid hormone messenger  
1211 ribonucleic acid stability, *Mol. Endocrinol.* (2006), doi:10.1210/me.2005-0333.
- 1212 59. K. S. Moore, N. Yagci, F. Van Alphen, N. A. Paolini, R. Horos, N. M. Held, R. H.  
1213 Houtkooper, E. Van Den Akker, A. B. Meijer, P. A. C. T’Hoen, M. Von Lindern, Csde1 binds  
1214 transcripts involved in protein homeostasis and controls their expression in an erythroid cell line,  
1215 *Sci. Rep.* (2018), doi:10.1038/s41598-018-20518-7.
- 1216 60. T. C. Chang, A. Yamashita, C. Y. A. Chen, Y. Yamashita, W. Zhu, S. Durdan, A. Kahvejian,  
1217 N. Sonenberg, A. Bin Shyu, UNR, a new partner of poly(A)-binding protein, plays a key role in  
1218 translationally coupled mRNA turnover mediated by the c-fos major coding-region determinant,  
1219 *Genes Dev.* (2004), doi:10.1101/gad.1219104.
- 1220 61. G. M. Wilson, M. Z. Vasa, R. G. Deeley, Stabilization and cytoskeletal-association of LDL  
1221 receptor mRNA are mediated by distinct domains in its 3' untranslated region, *J. Lipid Res.*  
1222 (1998).
- 1223 62. H. Li, W. Chen, Y. Zhou, P. Abidi, O. Sharpe, W. H. Robinson, F. B. Kraemer, J. Liu,

- 1224 Identification of mRNA binding proteins that regulate the stability of LDL receptor mRNA through  
1225 AU-rich elements, *J. Lipid Res.* (2009), doi:10.1194/jlr.M800375-JLR200.
- 1226 63. K. Bjune, L. Wierød, S. Naderi, Triciribine increases LDLR expression and LDL uptake  
1227 through stabilization of LDLR mRNA, *Sci. Rep.* (2018), doi:10.1038/s41598-018-34237-6.
- 1228 64. T. Bakheet, M. Frevel, B. R. G. Williams, W. Greer, K. S. A. Khabar, ARED: Human AU-rich  
1229 element-containing mRNA database reveals an unexpectedly diverse functional repertoire of  
1230 encoded proteins, *Nucleic Acids Res.* (2001), doi:10.1093/nar/29.1.246.
- 1231 65. R. S. Wu, I. I. Lam, H. Clay, D. N. Duong, R. C. Deo, S. R. Coughlin, A Rapid Method for  
1232 Directed Gene Knockout for Screening in G0 Zebrafish., *Dev. Cell* **46**, 112-125.e4 (2018).
- 1233 66. C. Liu, Y. S. Kim, J. Kim, J. Pattison, A. Kamaid, Y. I. Miller, Modeling hypercholesterolemia  
1234 and vascular lipid accumulation in LDL receptor mutant zebrafish, *J. Lipid Res.* **59**, 391–399  
1235 (2018).
- 1236 67. A. B. Singh, H. Li, C. F. K. Kan, B. Dong, M. R. Nicolls, J. Liu, The critical role of mRNA  
1237 destabilizing protein heterogeneous nuclear ribonucleoprotein D in 3' untranslated region-  
1238 mediated decay of low-density lipoprotein receptor mRNA in liver tissue, *Arterioscler. Thromb.*  
1239 *Vasc. Biol.* (2014), doi:10.1161/ATVBAHA.112.301131.
- 1240 68. B. Paigen, A. Morrow, C. Brandon, D. Mitchell, P. Holmes, Variation in susceptibility to  
1241 atherosclerosis among inbred strains of mice, *Atherosclerosis* (1985), doi:10.1016/0021-  
1242 9150(85)90138-8.
- 1243 69. G. S. Getz, C. A. Reardon, Diet and murine atherosclerosis *Arterioscler. Thromb. Vasc. Biol.*  
1244 (2006), doi:10.1161/01.ATV.0000201071.49029.17.
- 1245 70. M. von Scheidt, Y. Zhao, Z. Kurt, C. Pan, L. Zeng, X. Yang, H. Schunkert, A. J. Lusis,  
1246 Applications and Limitations of Mouse Models for Understanding Human Atherosclerosis *Cell*  
1247 *Metab.* (2017), doi:10.1016/j.cmet.2016.11.001.
- 1248 71. R. Collins, C. Reith, J. Emberson, J. Armitage, C. Baigent, L. Blackwell, R. Blumenthal, J.  
1249 Danesh, G. D. Smith, D. DeMets, S. Evans, M. Law, S. MacMahon, S. Martin, B. Neal, N.  
1250 Poulter, D. Preiss, P. Ridker, I. Roberts, A. Rodgers, P. Sandercock, K. Schulz, P. Sever, J.  
1251 Simes, L. Smeeth, N. Wald, S. Yusuf, R. Peto, Interpretation of the evidence for the efficacy and  
1252 safety of statin therapy, *Lancet* **388**, 2532–2561 (2016).
- 1253 72. B. T. Emmer, E. J. Sherman, P. J. Lascuna, S. E. Graham, C. J. Willer, D. Ginsburg,  
1254 Genome-scale CRISPR screening for modifiers of cellular LDL uptake, *PLOS Genet.* (2021),  
1255 doi:10.1371/journal.pgen.1009285.
- 1256 73. M. N. Trinh, M. S. Brown, J. L. Goldstein, J. Han, G. Vale, J. G. McDonald, J. Seemann, J.  
1257 T. Mendell, F. Lu, Last step in the path of LDL cholesterol from lysosome to plasma membrane  
1258 to ER is governed by phosphatidylserine, *Proc. Natl. Acad. Sci. U. S. A.* (2020),  
1259 doi:10.1073/pnas.2010682117.
- 1260 74. C. Knouff, S. Malloy, J. Wilder, M. K. Altenburg, N. Maeda, Doubling Expression of the Low  
1261 Density Lipoprotein Receptor by Truncation of the 3'-Untranslated Region Sequence  
1262 Ameliorates Type III Hyperlipoproteinemia in Mice Expressing the Human ApoE2 Isoform, *J.*  
1263 *Biol. Chem.* (2001), doi:10.1074/jbc.M009423200.
- 1264 75. W. Kong, J. Wei, P. Abidi, M. Lin, S. Inaba, C. Li, Y. Wang, Z. Wang, S. Si, H. Pan, S.  
1265 Wang, J. Wu, Y. Wang, Z. Li, J. Liu, J. D. Jiang, Berberine is a novel cholesterol-lowering drug  
1266 working through a unique mechanism distinct from statins, *Nat. Med.* (2004),  
1267 doi:10.1038/nm1135.
- 1268 76. H. Ju Lee, D. Bartsch, C. Xiao, S. Guerrero, G. Ahuja, C. Schindler, J. J. Moresco, J. R.  
1269 Yates, F. Gebauer, H. Bazzi, C. Dieterich, L. Kurian, D. Vilchez, A post-transcriptional program  
1270 coordinated by CSDE1 prevents intrinsic neural differentiation of human embryonic stem cells,  
1271 *Nat. Commun.* (2017), doi:10.1038/s41467-017-01744-5.
- 1272 77. O. Boussadia, M. Niepmann, L. Créancier, A.-C. Prats, F. Dautry, H. Jacquemin-Sablon,  
1273 Unr Is Required In Vivo for Efficient Initiation of Translation from the Internal Ribosome Entry  
1274 Sites of both Rhinovirus and Poliovirus, *J. Virol.* (2003), doi:10.1128/jvi.77.6.3353-3359.2003.



- 1275 78. V. Dormoy-Raclet, J. Markovits, A. Jacquemin-Sablon, H. Jacquemin-Sablon, Regulation of  
1276 Unr expression by 5'- and 3'-untranslated regions of its mRNA through modulation of stability  
1277 and IRES mediated translation, *RNA Biol.* (2005), doi:10.4161/rna.2.3.2203.
- 1278 79. K. E. Duncan, C. Strein, M. W. Hentze, The SXL-UNR Corepressor Complex Uses a PABP-  
1279 Mediated Mechanism to Inhibit Ribosome Recruitment to msl-2 mRNA, *Mol. Cell* (2009),  
1280 doi:10.1016/j.molcel.2009.09.042.
- 1281 80. S. Ray, E. C. Anderson, Stimulation of translation by human Unr requires cold shock  
1282 domains 2 and 4, and correlates with poly(A) binding protein interaction, *Sci. Rep.* (2016),  
1283 doi:10.1038/srep22461.
- 1284 81. H. Guo, Y. Li, L. Shen, T. Wang, X. Jia, L. Liu, T. Xu, M. Ou, K. Hoekzema, H. Wu, M. A.  
1285 Gillentine, C. Liu, H. Ni, P. Peng, R. Zhao, Y. Zhang, C. Phornphutkul, A. P. A. Stegmann, C. E.  
1286 Prada, R. J. Hopkin, J. T. Shieh, K. McWalter, K. G. Monaghan, P. M. van Hasselt, K. van  
1287 Gassen, T. Bai, M. Long, L. Han, Y. Quan, M. Chen, Y. Zhang, K. Li, Q. Zhang, J. Tan, T. Zhu,  
1288 Y. Liu, N. Pang, J. Peng, D. A. Scott, S. R. Lalani, M. Azamian, G. M. S. Mancini, D. J. Adams,  
1289 M. Kvarnung, A. Lindstrand, A. Nordgren, J. Pevsner, I. A. Osei-Owusu, C. Romano, G.  
1290 Calabrese, O. Galesi, J. Gecz, E. Haan, J. Ranells, M. Racobaldo, M. Nordenskjold, S. Madan-  
1291 Khetarpal, J. Sebastian, S. Ball, X. Zou, J. Zhao, Z. Hu, F. Xia, P. Liu, J. A. Rosenfeld, B. B. A.  
1292 de Vries, R. A. Bernier, Z. Q. D. Xu, H. Li, W. Xie, R. B. Hufnagel, E. E. Eichler, K. Xia,  
1293 Disruptive variants of CSDE1 associate with autism and interfere with neuronal development  
1294 and synaptic transmission, *Sci. Adv.* (2019), doi:10.1126/sciadv.aax2166.
- 1295 82. L. Wurth, P. Papasaikas, D. Olmeda, N. Bley, G. T. Calvo, S. Guerrero, D. Cerezo-Wallis, J.  
1296 Martinez-Useros, M. García-Fernández, S. Hüttelmaier, M. S. Soengas, F. Gebauer,  
1297 UNR/CSDE1 Drives a Post-transcriptional Program to Promote Melanoma Invasion and  
1298 Metastasis, *Cancer Cell* (2016), doi:10.1016/j.ccell.2016.10.004.
- 1299 83. P. Gennemark, K. Walter, N. Clemmensen, D. Rekić, C. A. M. Nilsson, J. Knöchel, M.  
1300 Hölttä, L. Wernevik, B. Rosengren, D. Kakol-Palm, Y. Wang, R. Z. Yu, R. S. Geary, S. J. Riney,  
1301 B. P. Monia, R. Isaksson, R. Jansson-Löfmark, C. S. J. Rocha, D. Lindén, E. Hurt-Camejo, R.  
1302 Crooke, L. Tillman, T. Rydén-Bergsten, B. Carlsson, U. Andersson, M. Elebring, A. Tivesten, N.  
1303 Davies, An oral antisense oligonucleotide for PCSK9 inhibition, *Sci. Transl. Med.* **13**, eabe9117  
1304 (2021).
- 1305 84. K. Musunuru, A. C. Chadwick, T. Mizoguchi, S. P. Garcia, J. E. DeNizio, C. W. Reiss, K.  
1306 Wang, S. Iyer, C. Dutta, V. Clendaniel, M. Amaonye, A. Beach, K. Berth, S. Biswas, M. C.  
1307 Braun, H.-M. Chen, T. V Colace, J. D. Ganey, S. A. Gangopadhyay, R. Garrity, L. N. Kasiewicz,  
1308 J. Lavoie, J. A. Madsen, Y. Matsumoto, A. M. Mazzola, Y. S. Nasrullah, J. Nneji, H. Ren, A.  
1309 Sanjeev, M. Shay, M. R. Stahley, S. H. Y. Fan, Y. K. Tam, N. M. Gaudelli, G. Ciaramella, L. E.  
1310 Stolz, P. Malyala, C. J. Cheng, K. G. Rajeev, E. Rohde, A. M. Bellinger, S. Kathiresan, In vivo  
1311 CRISPR base editing of PCSK9 durably lowers cholesterol in primates, *Nature* **593**, 429–434  
1312 (2021).
- 1313 85. K. F. McClure, D. W. Piotrowski, D. Petersen, L. Wei, J. Xiao, A. T. Londregan, A. S.  
1314 Kamlet, A.-M. Dechert-Schmitt, B. Raymer, R. B. Ruggeri, D. Canterbury, C. Limberakis, S.  
1315 Liras, P. DaSilva-Jardine, R. G. Dullea, P. M. Loria, B. Reidich, C. T. Salatto, H. Eng, E. Kimoto,  
1316 K. Atkinson, A. King-Ahmad, D. Scott, K. Beaumont, J. R. Chabot, M. W. Bolt, K. Maresca, K.  
1317 Dahl, R. Arakawa, A. Takano, C. Halldin, Liver-Targeted Small-Molecule Inhibitors of Proprotein  
1318 Convertase Subtilisin/Kexin Type 9 Synthesis, *Angew. Chemie Int. Ed.* **56**, 16218–16222  
1319 (2017).
- 1320 86. J. Martinez-Useros, N. Garcia-Carbonero, W. Li, M. J. Fernandez-Aceñero, I. Cristobal, R.  
1321 Rincon, M. Rodriguez-Remirez, A. Borrero-Palacios, J. Garcia-Foncillas, UNR/CSDE1  
1322 Expression Is Critical to Maintain Invasive Phenotype of Colorectal Cancer through Regulation  
1323 of c-MYC and Epithelial-to-Mesenchymal Transition, *J. Clin. Med.* (2019),  
1324 doi:10.3390/jcm8040560.
- 1325 87. V. Dormoy-Raclet, J. Markovits, Y. Malato, S. Huet, P. Lagarde, D. Montaudon, A.

- 1326 Jacquemin-Sablon, H. Jacquemin-Sablon, Unr, a cytoplasmic RNA-binding protein with cold-  
1327 shock domains, is involved in control of apoptosis in ES and HuH7 cells, *Oncogene* (2007),  
1328 doi:10.1038/sj.onc.1210068.
- 1329 88. N. Matsuzawa, T. Takamura, S. Kurita, H. Misu, T. Ota, H. Ando, M. Yokoyama, M. Honda,  
1330 Y. Zen, Y. Nakanuma, K. I. Miyamoto, S. Kaneko, Lipid-induced oxidative stress causes  
1331 steatohepatitis in mice fed an atherogenic diet, *Hepatology* (2007), doi:10.1002/hep.21874.
- 1332 89. J. J. V McMurray, M. Packer, A. S. Desai, J. Gong, M. P. Lefkowitz, A. R. Rizkala, J. L.  
1333 Rouleau, V. C. Shi, S. D. Solomon, K. Swedberg, M. R. Zile, Angiotensin–Neprilysin Inhibition  
1334 versus Enalapril in Heart Failure, *N. Engl. J. Med.* **371**, 993–1004 (2014).
- 1335 90. D. G. Gibson, L. Young, R.-Y. Chuang, J. C. Venter, C. A. Hutchison, H. O. Smith,  
1336 Enzymatic assembly of DNA molecules up to several hundred kilobases., *Nat. Methods* **6**, 343–  
1337 5 (2009).
- 1338 91. J. S. Chorba, A. M. Galvan, K. M. Shokat, Stepwise processing analyses of the single-  
1339 turnover PCSK9 protease reveal its substrate sequence specificity and link clinical genotype to  
1340 lipid phenotype, *J. Biol. Chem.* **293**, 1875–1886 (2018).
- 1341 92. J. H. Kim, S.-R. Lee, L.-H. Li, H.-J. Park, J.-H. Park, K. Y. Lee, M.-K. Kim, B. A. Shin, S.-Y.  
1342 Choi, V. Thiel, Ed. High Cleavage Efficiency of a 2A Peptide Derived from Porcine Teschovirus-  
1343 1 in Human Cell Lines, Zebrafish and Mice, *PLoS One* **6**, e18556 (2011).
- 1344 93. D. G. Gibson, H. O. Smith, C. A. Hutchison, J. C. Venter, C. Merryman, Chemical synthesis  
1345 of the mouse mitochondrial genome, *Nat. Methods* (2010), doi:10.1038/nmeth.1515.
- 1346 94. H. Mi, A. Muruganujan, X. Huang, D. Ebert, C. Mills, X. Guo, P. D. Thomas, Protocol Update  
1347 for large-scale genome and gene function analysis with the PANTHER classification system  
1348 (v.14.0), *Nat. Protoc.* (2019), doi:10.1038/s41596-019-0128-8.
- 1349 95. A. Bateman, UniProt: A worldwide hub of protein knowledge, *Nucleic Acids Res.* (2019),  
1350 doi:10.1093/nar/gky1049.
- 1351 96. C. Sudlow, J. Gallacher, N. Allen, V. Beral, P. Burton, J. Danesh, P. Downey, P. Elliott, J.  
1352 Green, M. Landray, B. Liu, P. Matthews, G. Ong, J. Pell, A. Silman, A. Young, T. Sprosen, T.  
1353 Peakman, R. Collins, UK Biobank: An Open Access Resource for Identifying the Causes of a  
1354 Wide Range of Complex Diseases of Middle and Old Age, *PLoS Med.* (2015),  
1355 doi:10.1371/journal.pmed.1001779.
- 1356 97. P. R. Loh, G. Tucker, B. K. Bulik-Sullivan, B. J. Vilhjálmsson, H. K. Finucane, R. M. Salem,  
1357 D. I. Chasman, P. M. Ridker, B. M. Neale, B. Berger, N. Patterson, A. L. Price, Efficient  
1358 Bayesian mixed-model analysis increases association power in large cohorts, *Nat. Genet.*  
1359 (2015), doi:10.1038/ng.3190.
- 1360 98. J. M. Baker, F. M. Boyce, High-throughput functional screening using a homemade dual-  
1361 glow luciferase assay, *J. Vis. Exp.* (2014), doi:10.3791/50282.
- 1362 99. M. I. Love, W. Huber, S. Anders, Moderated estimation of fold change and dispersion for  
1363 RNA-seq data with DESeq2, *Genome Biol.* (2014), doi:10.1186/s13059-014-0550-8.
- 1364 100. M. D. Robinson, D. J. McCarthy, G. K. Smyth, edgeR: a Bioconductor package for  
1365 differential expression analysis of digital gene expression data., *Bioinformatics* **26**, 139–140  
1366 (2010).
- 1367 101. A. T. L. Lun, Y. Chen, G. K. Smyth, It's DE-licious: A Recipe for Differential Expression  
1368 Analyses of RNA-seq Experiments Using Quasi-Likelihood Methods in edgeR., *Methods Mol.*  
1369 *Biol.* **1418**, 391–416 (2016).
- 1370 102. M. V. Kuleshov, M. R. Jones, A. D. Rouillard, N. F. Fernandez, Q. Duan, Z. Wang, S.  
1371 Koplev, S. L. Jenkins, K. M. Jagodnik, A. Lachmann, M. G. McDermott, C. D. Monteiro, G. W.  
1372 Gundersen, A. Ma'ayan, Enrichr: a comprehensive gene set enrichment analysis web server  
1373 2016 update, *Nucleic Acids Res.* (2016), doi:10.1093/nar/gkw377.
- 1374 103. Z. Gu, R. Eils, M. Schlesner, Complex heatmaps reveal patterns and correlations in  
1375 multidimensional genomic data., *Bioinformatics* **32**, 2847–2849 (2016).
- 1376 104. G. S. (editors). Higgins JPT, Cochrane Handbook for Systematic Reviews of Interventions

1377 Version 5.1.0 *Cochrane Collab.* (2011).  
1378 105. M. Roederer, W. Moore, A. Treister, R. R. Hardy, L. A. Herzenberg, Probability binning  
1379 comparison: A metric for quantitating multivariate distribution differences, *Cytometry* (2001),  
1380 doi:10.1002/1097-0320(20010901)45:1<47::AID-CYTO1143>3.0.CO;2-A.  
1381 106. M. Roederer, A. Treister, W. Moore, L. A. Herzenberg, Probability binning comparison: A  
1382 metric for quantitating univariate distribution differences, *Cytometry* (2001), doi:10.1002/1097-  
1383 0320(20010901)45:1<37::AID-CYTO1142>3.0.CO;2-E.  
1384 107. M. Roederer, R. R. Hardy, Frequency difference gating: A multivariate method for  
1385 identifying subsets that differ between samples, *Cytometry* (2001), doi:10.1002/1097-  
1386 0320(20010901)45:1<56::AID-CYTO1144>3.0.CO;2-9.  
1387  
1388

1389 **Figures and Figure Legends**  
 1390

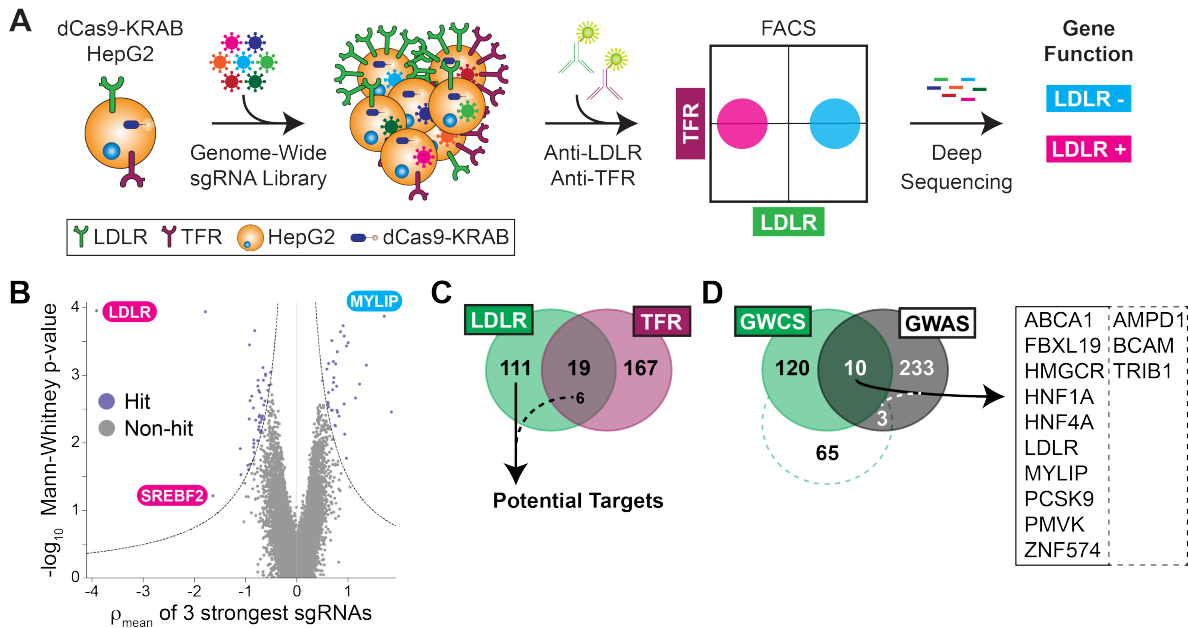

1391  
 1392  
 1393  
 1394  
 1395  
 1396  
 1397  
 1398  
 1399  
 1400  
 1401  
 1402  
 1403  
 1404

**Figure 1: Genome-Wide CRISPR Interference Screen.** A) Overall schematic of selection. See text for details. B) Volcano plot showing the statistical significance (Mann-Whitney test) of the guides recovered for each gene against the mean  $\rho$  phenotype of the three guides with the strongest effect.  $\rho$  is defined as the  $\log_2$ -fold enrichment for high LDLR expressing cells to the low LDLR expressing cells. Guides targeting known regulators of the LDLR are noted. C) Venn diagram showing the overlap between parallel LDLR and TFR screens. 6 guides common to both had opposing expression phenotypes in the respective screens and were included as specific hits. D) Venn diagram of hits between the LDLR screen (GWCS) and putative genes correlated with serum LDL from GWAS. The dotted line indicates a relaxed threshold for hit selection from LDLR screen, with only an additional 3 genes in the overlap. Overlap genes shown at right.



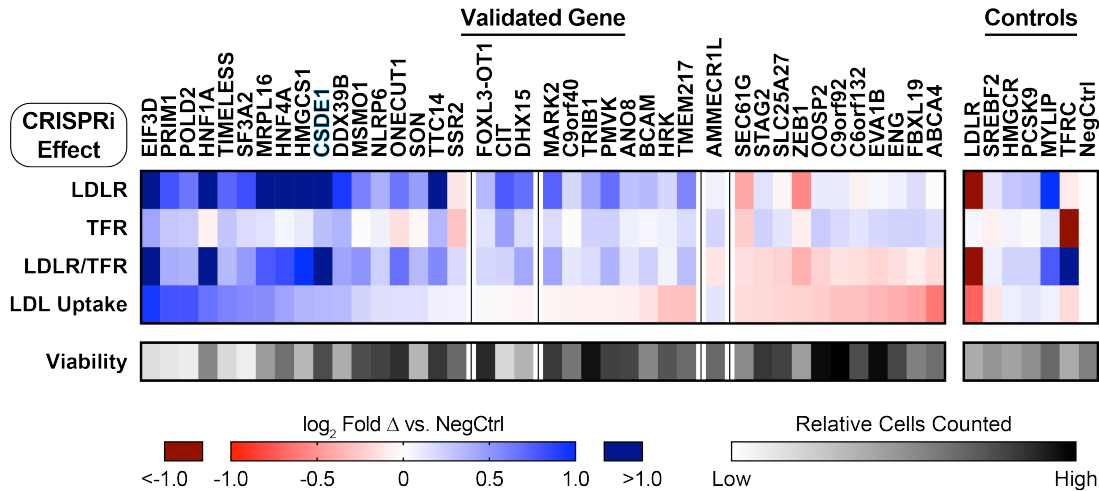

1405  
1406

1407 **Figure 2: Validation of LDLR CRISPRi Hits.** Heatmap showing receptor abundance (LDLR,  
1408 TFR, and LDLR/TFR ratio) and function (LDL uptake) for dCas9-KRAB HepG2 cells transduced  
1409 with sgRNA targeting the indicated gene, analyzed by flow cytometry. Hits are grouped  
1410 according to directional effect on LDLR abundance, and then within groups, by effect on LDL  
1411 uptake (with uptake from *FOXL3-OT1*, *CIT*, and *DHX15* sgRNAs not significantly different from  
1412 negative control sgRNA). *CSDE1* highlighted in blue. Control sgRNAs shown at right. Readouts  
1413 show log<sub>2</sub> fold change compared to transduction with negative control sgRNA and represent the  
1414 weighted average of the effects from both sgRNAs targeting each gene. Viability indicates the  
1415 relative number of cells surviving to flow cytometry in the experiments. Functional classification  
1416 of genes is shown visually in Supp. Fig. 3. Note that LDLR/TFR is a separately ascertained  
1417 value from individual cells, and not a derived parameter from aggregate data. Only the hits for  
1418 which two separate sgRNAs independently validated for receptor expression are shown, defined  
1419 as  $p < 0.05$  via Holm-Sidak corrected T-test. Data represent summary information from 3 to 4  
1420 independent experiments.  
1421

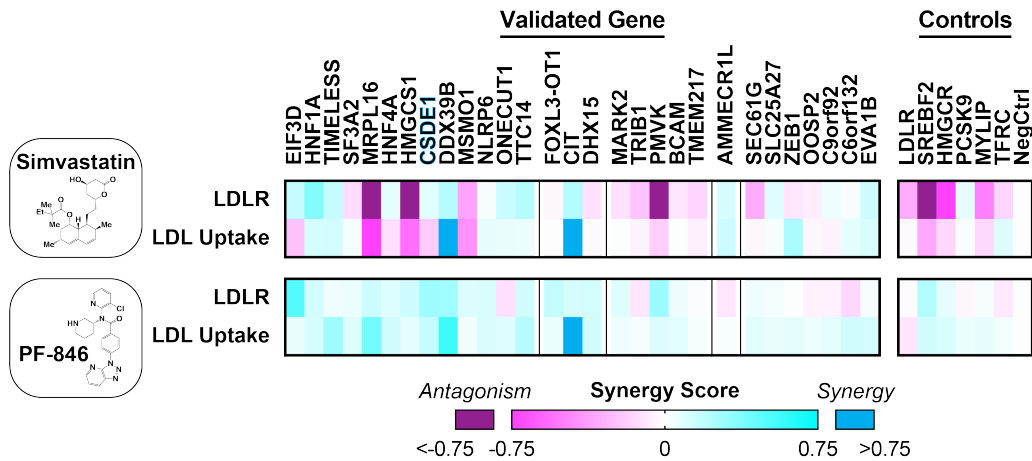

1422  
1423  
1424  
1425  
1426  
1427  
1428  
1429  
1430

**Figure 3: CRISPRi Knockdown Synergy with Statin and PF-846.** Heatmap showing synergy score with statin (top) or PF-846 (bottom) for knockdowns of indicated validated genes with a single sgRNA for separate LDLR abundance and function experiments. Hits are grouped first according to overall effect on LDLR abundance, and secondarily by effect on LDL uptake, as in Fig. 2. *CSDE1* highlighted in blue. Data represent summary information from 4 independent experiments.

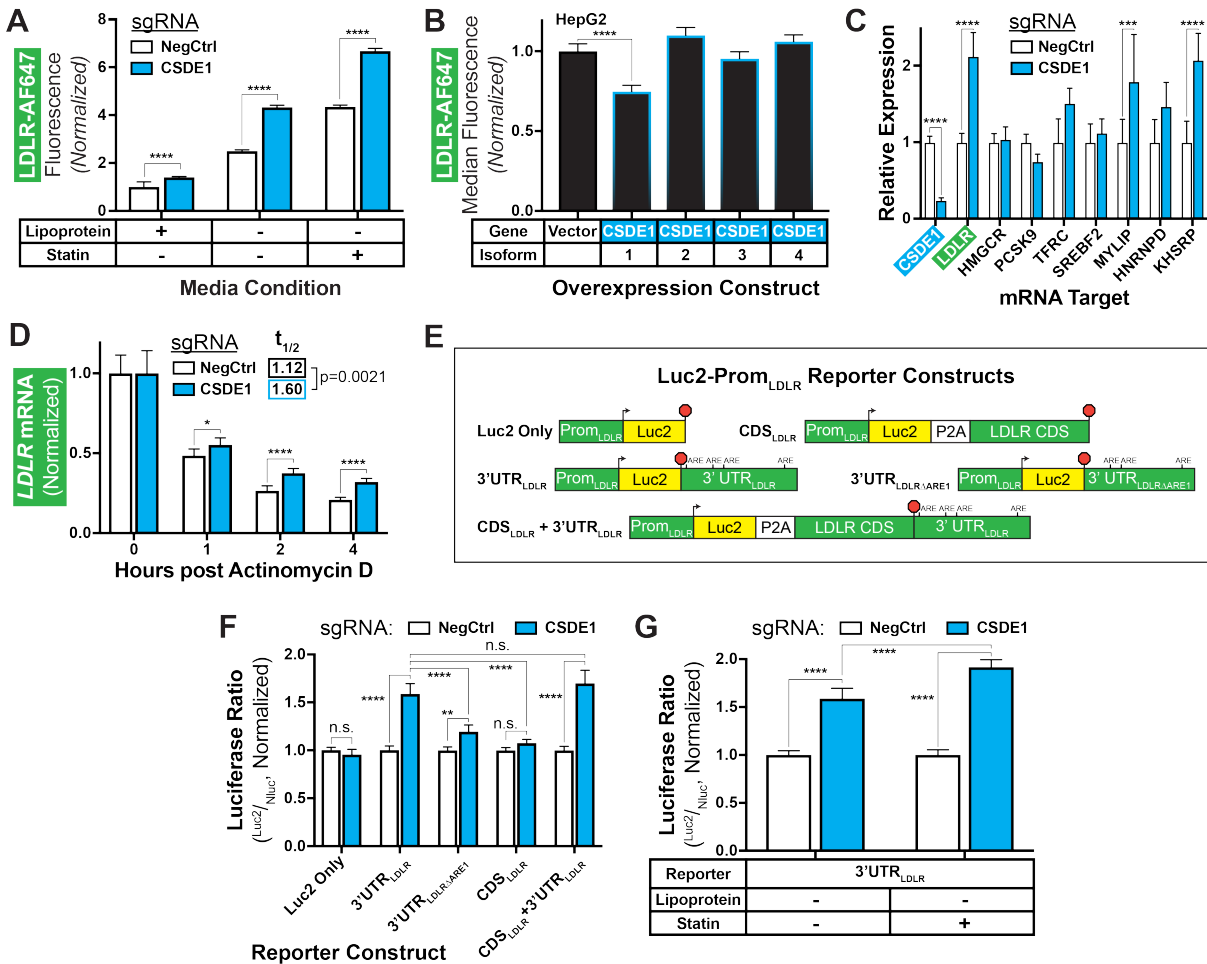

1431  
1432  
1433  
1434  
1435  
1436  
1437  
1438  
1439  
1440  
1441  
1442  
1443  
1444  
1445  
1446  
1447  
1448  
1449  
1450  
1451  
1452  
1453

**Figure 4: CSDE1 Mediates LDLR mRNA Decay.** A) Relative LDLR abundance, by normalized mean fluorescence, in engineered dCas9-KRAB HepG2 cells transduced with indicated sgRNAs (CRISPRi cells) and grown in the indicated media conditions. B) Relative LDLR abundance, by normalized median fluorescence, in HepG2 cells overexpressing indicated CSDE1 isoforms. One-way ANOVA with Tukey's multiple comparisons test shown. C) Relative expression, by qPCR, of indicated mRNA targets in CRISPRi cells under sterol-depleted conditions. D) Relative expression, by qPCR, of *LDLR* mRNA in CRISPRi cells after arrest of transcription with actinomycin D. Data are normalized to results at T=0 within the sgRNA evaluated to illustrate the change in time.  $t_{1/2}$  shown indicates the best fit data to a one-stage exponential decay equation. Unpaired t-tests with Holm-Sidak correction shown for pairwise comparisons. Extra sum-of-squares F test shown for decay equation. E) Schematics of Luc2-Prom<sub>LDLR</sub> reporter constructs, illustrating *LDLR* promoter, start site (arrowhead), P2A ribosomal skipping sequence (if present), AREs in 3' UTR, stop codon (red octagon), and indicated regions of the *LDLR* gene. ARE = Adenylate-uridylate (AU) rich element. Schematics not to scale. F) Ratiometric luciferase outputs, normalized to negative control, of CRISPRi cells transfected with indicated luciferase constructs. G) Ratiometric luciferase outputs of 3' UTR added luciferase constructs in CRISPRi cells. All panels) Error bars indicate 95% confidence intervals. Data represent summary information from 3-4 independent experiments. n.s. = not significant, \* =  $p < 0.05$ , \*\* =  $p < 0.01$ , \*\*\* =  $p < 0.001$ , and \*\*\*\* =  $p < 0.0001$ . Unless otherwise indicated, two-way ANOVA with Sidak's multiple comparisons test was used for statistical analysis.

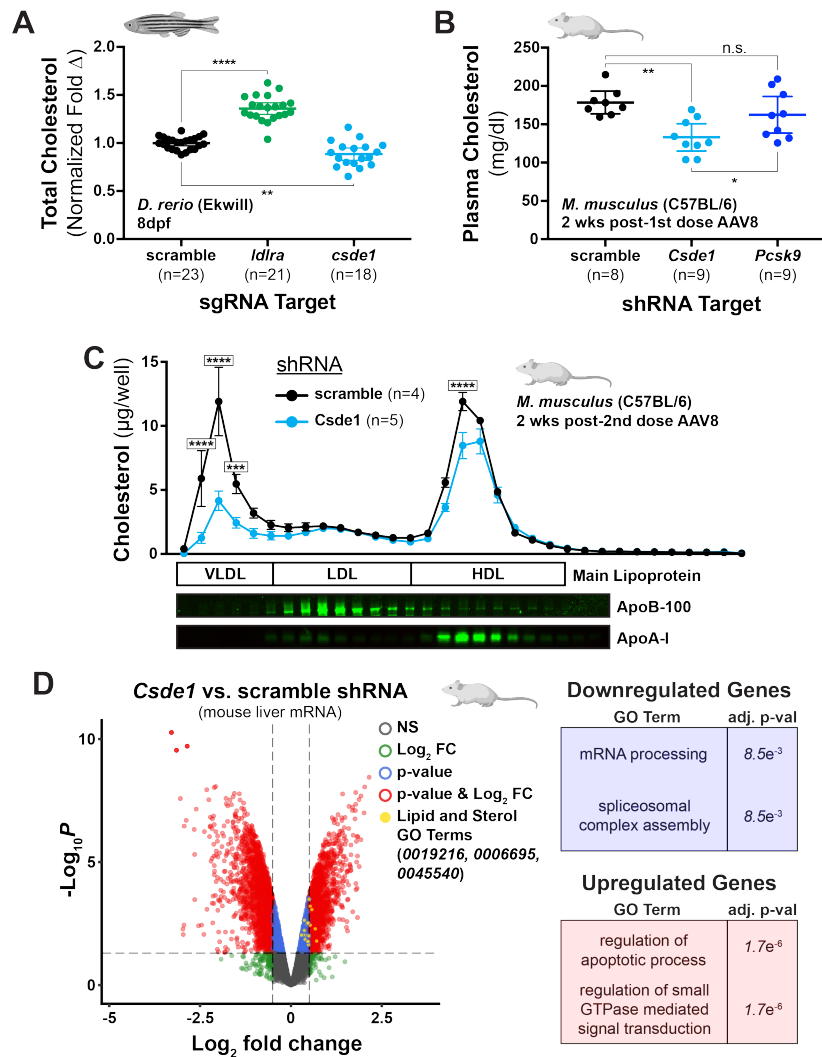

1454  
1455  
1456  
1457  
1458  
1459  
1460  
1461  
1462  
1463  
1464  
1465  
1466  
1467  
1468  
1469  
1470  
1471  
1472  
1473

**Figure 5: CSDE1 Disruption Upregulates the LDLR *in vivo*.** A) Total cholesterol, in  $\mu$ g cholesterol per mg of total protein, of homogenates of 8 days post fertilization (dpf) zebrafish larvae fed a high-cholesterol diet and subjected to Cas9 mediated gene disruption of indicated target. Data are normalized to the scramble control of a particular experiment. Each point represents a homogenate consisting of 10 larvae. Data represent summary information from 4 independent experiments. One-way ANOVA with Holm-Sidak's multiple comparisons test shown. B) Total fasting plasma cholesterol of C57BL/6 mice on an atherogenic diet, 2 weeks after transduction with AAV8-packaged shRNA against indicated target. Each point represents an individual mouse. One-way ANOVA with Tukey's multiple comparisons test shown. Error bars = 95% confidence intervals. C) Cholesterol levels of fractions collected from gel filtration of plasma from individual mice, harvested 2 weeks after transduction with second dose of AAV8-packaged shRNA. Note that fractions shown begin with the elution front from the size-exclusion column. Each dot represents the mean cholesterol level from mice in the same intervention arm. Immunoblots from representative fractions against mouse ApoB-100 and ApoA-I shown below. Two-way ANOVA with Sidak's multiple comparisons test shown to illustrate comparison between treatment arm within a given fraction. Error bars = standard error of the mean. D) Volcano plot showing differentially expressed genes between *Csde1* and scramble shRNA treatment arms, filtered for effects of viral transduction. Statistical significance is shown on the y



1474 axis and strength of effect is shown on the x axis. Comparison made among the 3 mice in each  
1475 arm with the highest *eGFP* transcript expression, as a proxy for transduction efficiency. Genes  
1476 reaching threshold significance for p-value (blue), log<sub>2</sub> fold change (green), both (red), or neither  
1477 (grey) annotated accordingly. Genes associated with lipid and sterol metabolic GO terms  
1478 highlighted in yellow (0019216 = lipid metabolic process, 000695 = cholesterol biosynthetic  
1479 process, and 0045540 = regulation of cholesterol biosynthetic process). Leading upregulated  
1480 and downregulated GO terms of all statistically significant differentially expressed genes noted  
1481 in the boxes at right. *All panels*) n.s. = non-significant, \* = p < 0.05, \*\* = p < 0.01, \*\*\* = p <  
1482 0.001, and \*\*\*\* = p < 0.0001.  
1483

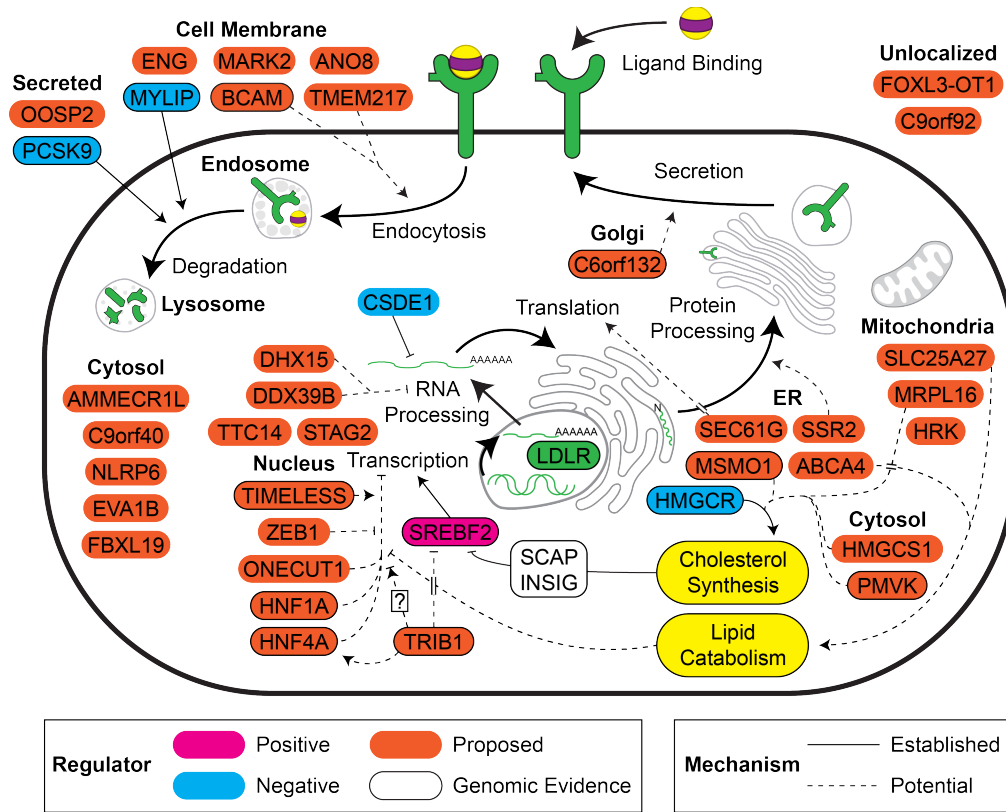

1484  
 1485  
 1486  
 1487  
 1488  
 1489  
 1490  
 1491  
 1492

**Figure 6: An Exploratory Map of Potential LDLR Regulatory Targets.** Genes identified and validated in the screen are mapped by cellular localization and possible mechanisms of effect. Known downregulators are shown in cyan (including CSDE1 given the results presented in the current study) and known upregulators shown in magenta. Validated hits with observed effects on cell proliferation or viability are excluded.

1493 **Tables and Table Legends**  
1494

| Hit      | Hit (NCBI Name) |
|----------|-----------------|
| ABCA1    | ABCA1           |
| ABCA4    | ABCA4           |
| ACAN     | ACAN            |
| ALKBH5   | ALKBH5          |
| AMMECR1L | AMMECR1L        |
| ANO8     | ANO8            |
| BCAR1    | BCAR1           |
| C12orf45 | C12orf45        |
| C14orf79 | CLBA1           |
| C1orf210 | C1orf210        |
| C5orf34  | C5orf34         |
| C6orf132 | C6orf132        |
| C9orf40  | C9orf40         |
| C9orf92  | C9orf92         |
| CD164L2  | CD164L2         |
| CD276    | CD276           |
| CD96     | CD96            |
| CIT      | CIT             |
| CSDE1    | CSDE1           |
| CXCR2    | CXCR2           |
| CXXC11   | FBXL19          |
| CYB5R3   | CYB5R3          |
| DDX39B   | DDX39B          |
| DES1     | DES1            |
| DHX15    | DHX15           |
| DUOX1    | DUOX1           |
| EIF3D    | EIF3D           |
| ENG      | ENG             |
| ENTPD1   | ENTPD1          |
| ESRRG    | ESRRG           |
| EVA1B    | EVA1B           |
| FAM126A  | FAM126A         |
| FAM178B  | FAM178B         |
| FAM57A   | TLCD3A          |
| FBXW11   | FBXW11          |
| FDPS     | FDPS            |

|              |           |
|--------------|-----------|
| GXYLT1       | GXYLT1    |
| HMGCR        | HMGCR     |
| HMGCS1       | HMGCS1    |
| HNF1A        | HNF1A     |
| HNF4A        | HNF4A     |
| HPGDS        | HPGDS     |
| HRK          | HRK       |
| ICAM4        | ICAM4     |
| INTS8        | INTS8     |
| ITGA11       | ITGA11    |
| ITGA7        | ITGA7     |
| ITGAV        | ITGAV     |
| LDLR         | LDLR      |
| LGALS14      | LGALS14   |
| LOC100288524 | FOXL3-OT1 |
| LOC729159    | NPAP1L    |
| LYZ          | LYZ       |
| MARK2        | MARK2     |
| MATN1        | MATN1     |
| MFHAS1       | MFHAS1    |
| MRAP2        | MRAP2     |
| MRPL16       | MRPL16    |
| MRPL22       | MRPL22    |
| MSMO1        | MSMO1     |
| MYLIP        | MYLIP     |
| NCR2         | NCR2      |
| NDUFB5       | NDUFB5    |
| NDUFS8       | NDUFS8    |
| NINJ1        | NINJ1     |
| NLRP6        | NLRP6     |
| ONECUT1      | ONECUT1   |
| OR52A1       | OR52A1    |
| PCDH7        | PCDH7     |
| PCDHB4       | PCDHB4    |
| PCSK9        | PCSK9     |
| PHGR1        | PHGR1     |
| PIANP        | PIANP     |
| PID1         | PID1      |
| PLAC1L       | OOSP2     |



|            |            |
|------------|------------|
| PMVK       | PMVK       |
| POLD2      | POLD2      |
| POLD3      | POLD3      |
| PRIM1      | PRIM1      |
| PROL1      | OPRPN      |
| PTGDR2     | PTGDR2     |
| RARRES3    | PLAAT4     |
| REPS1      | REPS1      |
| RNF151     | RNF151     |
| RSG1       | CPLANE2    |
| SCUBE1     | SCUBE1     |
| SEC61G     | SEC61G     |
| SERPINA9   | SERPINA9   |
| SF3A2      | SF3A2      |
| SLC25A27   | SLC25A27   |
| SLC2A7     | SLC2A7     |
| SLC6A19    | SLC6A19    |
| SLURP1     | SLURP1     |
| SMURF1     | SMURF1     |
| SON        | SON        |
| SREBF2     | SREBF2     |
| SSR2       | SSR2       |
| SSUH2      | SSUH2      |
| ST6GALNAC4 | ST6GALNAC4 |
| STAC       | STAC       |
| STAG2      | STAG2      |
| TIMELESS   | TIMELESS   |
| TMEM217    | TMEM217    |
| TMEM86A    | TMEM86A    |
| TPRG1      | TPRG1      |
| TRMT10C    | TRMT10C    |
| TRPM1      | TRPM1      |
| TRPM7      | TRPM7      |
| TTC14      | TTC14      |
| TXNDC8     | TXNDC8     |
| WDR5       | WDR5       |
| WDR75      | WDR75      |
| ZBED6CL    | ZBED6CL    |
| ZBTB42     | ZBTB42     |

|         |         |
|---------|---------|
| ZC3H12A | ZC3H12A |
| ZEB1    | ZEB1    |
| ZNF595  | ZNF595  |

1495  
1496  
1497  
1498

**Table 1: LDLR Specific CRISPRi Screen Hits.** Hits are listed both by gene name in the genome-wide library(14) as well as NCBI name.

| GENE     | Variant rsID | BETA       | P_BOLT_LMM | Consequence                          | IMPACT   |
|----------|--------------|------------|------------|--------------------------------------|----------|
| HNF4A    | rs1800961    | 0.0564144  | 0          | missense_variant                     | MODERATE |
| BCAM     | rs28399659   | -0.0174111 | 7.70E-29   | missense_variant                     | MODERATE |
| BCAM     | rs200398713  | -0.0803165 | 1.80E-28   | splice_region_variant,intron_variant | LOW      |
| BCAM     | rs199922856  | -0.342179  | 6.20E-28   | missense_variant                     | MODERATE |
| BCAM     | rs28399654   | 0.220592   | 6.10E-10   | missense_variant                     | MODERATE |
| BCAM     | rs3810141    | 0.020077   | 5.50E-07   | stop_gained                          | HIGH     |
| TIMELESS | rs2291738    | 0.00388393 | 0.00014    | splice_region_variant,intron_variant | LOW      |
| BCAM     | rs149302547  | -0.147327  | 0.005      | missense_variant                     | MODERATE |
| BCAM     | rs1135062    | -0.0213642 | 0.0074     | missense_variant                     | MODERATE |
| C6orf132 | rs55772414   | 0.0116856  | 0.013      | missense_variant                     | MODERATE |
| MSMO1    | rs142496142  | 0.0432195  | 0.015      | missense_variant                     | MODERATE |

1499

1500

1501

1502

**Table 2: Association of Nonsynonymous Variants in CRISPRi Screen Hits with Serum LDL-C in the UK Biobank.** BETA indicates the linear regression standardized effect size, and P\_BOLT\_LMM indicates the linear mixed model p value using BOLT-LMM(97).

1503 **Supplementary Figures and Figure Legends**  
1504

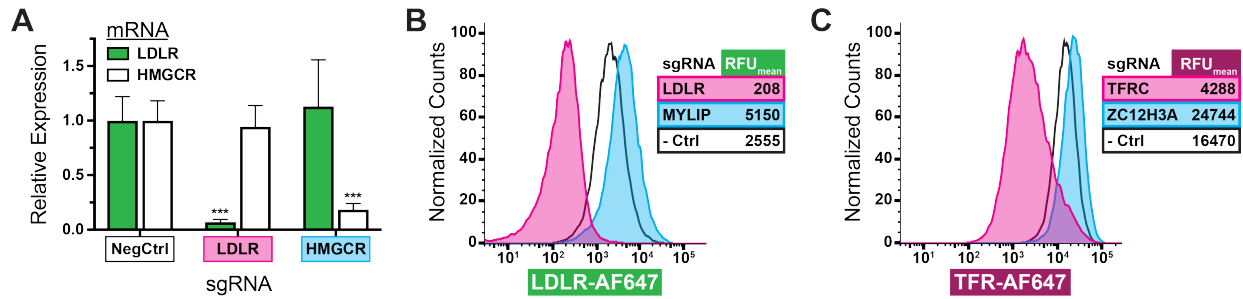

1505  
1506

1507 **Supplementary Figure 1: Validation of dCas9-KRAB-HepG2 Cells.** A) Relative expression,  
1508 by qPCR, of *LDLR* and *HMGCR* in engineered dCas9-KRAB HepG2 cells transduced with  
1509 sgRNAs targeting the indicated genes. *B2M* used as qPCR control. Error bars indicate 95%  
1510 confidence intervals. \*\*\* =  $p < 0.001$  by Holm-Sidak corrected T-test, comparing to negative  
1511 control sgRNA of the same target. B) Flow cytometry analysis, by surface labelling with anti-  
1512 LDLR-AF647, of dCas9-KRAB HepG2 cells transduced with sgRNAs targeting the indicated  
1513 genes. Mean fluorescence shown in inset. *MYLIP* (IDOL) is an E3 ligase which ubiquitinates the  
1514 LDLR, leading to lysosomal degradation(26). C) Flow cytometry analysis as in B but transduced  
1515 with indicated sgRNAs and labelled with anti-TFR-AF647. *ZC3H12A* (REG1) is an  
1516 endoribonuclease that accelerates the degradation of TFR mRNA(27).  
1517



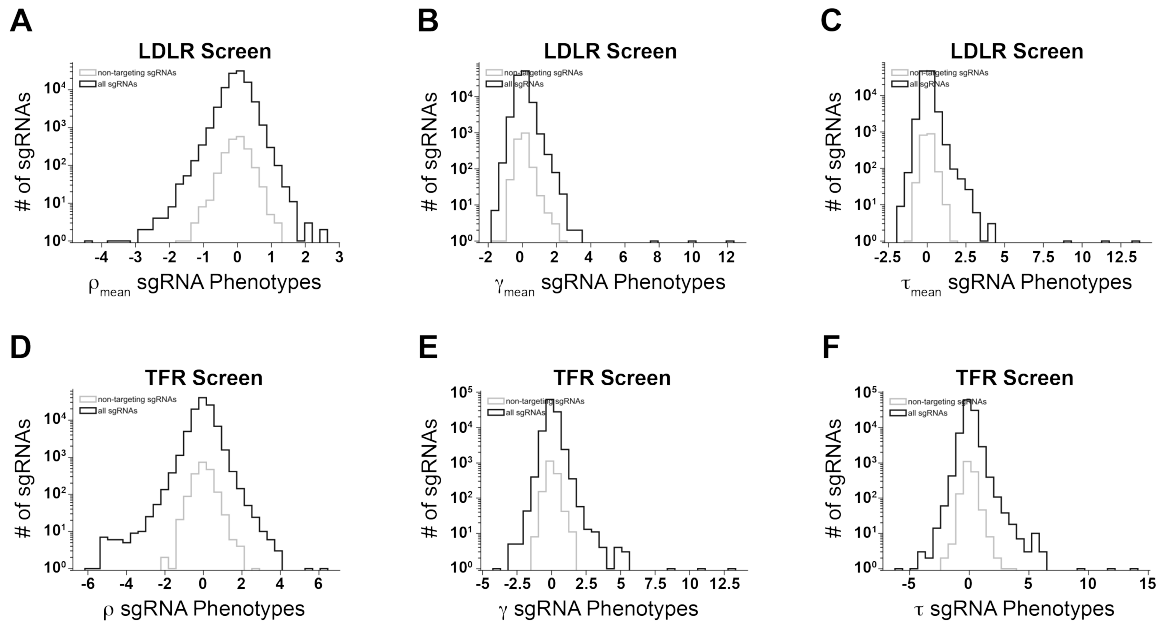

1518  
1519  
1520  
1521  
1522  
1523  
1524  
1525  
1526  
1527

**Supplementary Figure 2: Recovered sgRNAs from Screening Phenotypes.** Distribution of number of guide RNAs recovered by phenotype in both LDLR (A-C) and TFR (D-F) screens.  $\rho$  (A,D) indicates  $\log_2$  fold enrichment for sgRNA in high receptor abundance cells compared to low receptor abundance cells.  $\gamma$  (B,E) indicates  $\log_2$  enrichment for sgRNA in low receptor abundance cells compared to unsorted population.  $\tau$  (C,F) indicates  $\log_2$  enrichment for sgRNA in high receptor abundance cells compared to unsorted population. Mean results are reported for the 3 replicates of the LDLR screen (A-C).

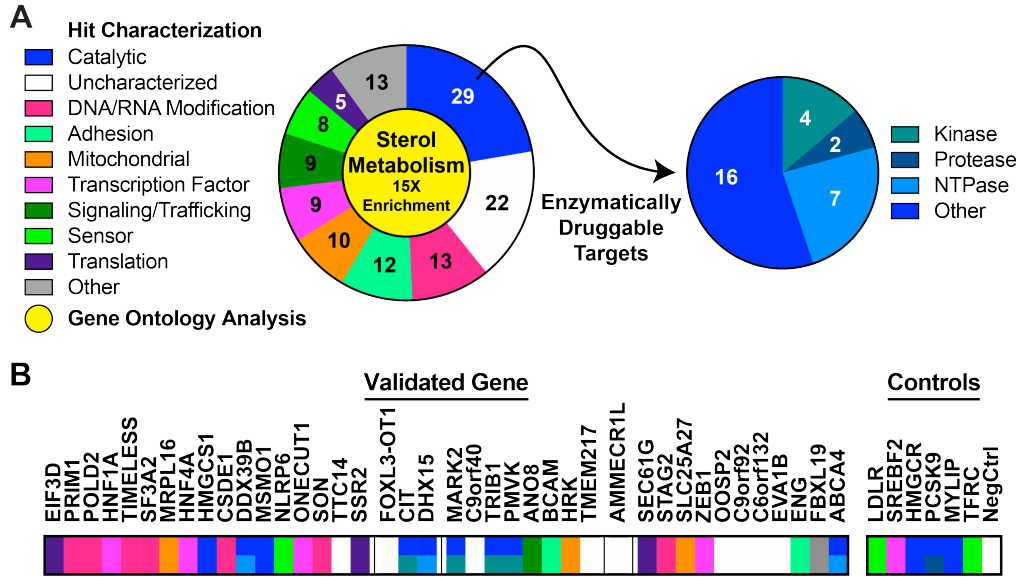

1528  
1529  
1530  
1531  
1532  
1533  
1534  
1535

**Supplementary Figure 3: Gene Ontology and Localization Analysis.** A) Characterization of hits from the LDLR screen based on gene ontology (GO) and localization, along with results from GO enrichment analysis (yellow center). Note that multiple genes fall into more than one category. B) Primary classification of the 40 LDLR hits independently validated outside of the pooled screen and displayed, as in Fig. 2, according to the color codes in A.

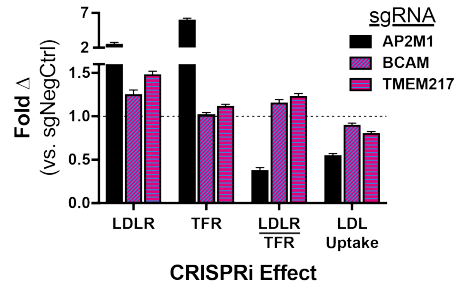

1536  
1537

1538 **Supplementary Figure 4: Selective LDLR Effect of Transmembrane Proteins.** Flow  
1539 cytometric readout of receptor abundance and LDLR function assays, using CRISPRi  
1540 knockdowns against genes thought to be involved in endocytosis. Data, which represents 3 to 4  
1541 independent experiments, are normalized to readout of negative control sgRNA within each  
1542 experiment. Error bars represent 95% confidence intervals. Note the discontinuous Y axis.

1543  
1544

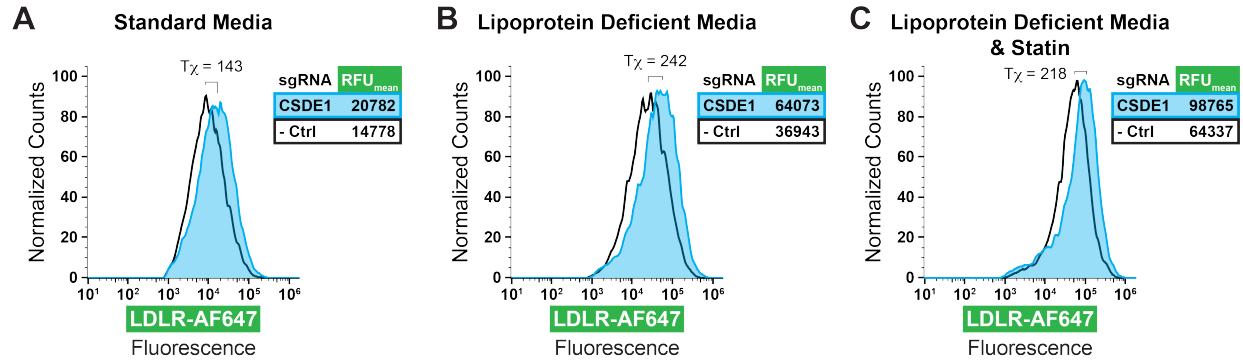

1545  
1546

1547 **Supplementary Figure 5: Effect of Sterol Conditions on CSDE1 Knockdown.** Flow  
1548 cytometry histograms showing AF647 conjugated anti-LDLR antibody labelling (as proxy for  
1549 LDLR abundance) of engineered dCas9-KRAB HepG2 cells transduced with indicated sgRNAs  
1550 and grown in standard growth media (A), lipoprotein-deficient media (B), or lipoprotein deficient  
1551 media with a concomitant statin (C).  $T_\chi$  metric (FlowJo v10)(105–107) shown on graph, and  
1552 mean fluorescence shown in insets.  
1553

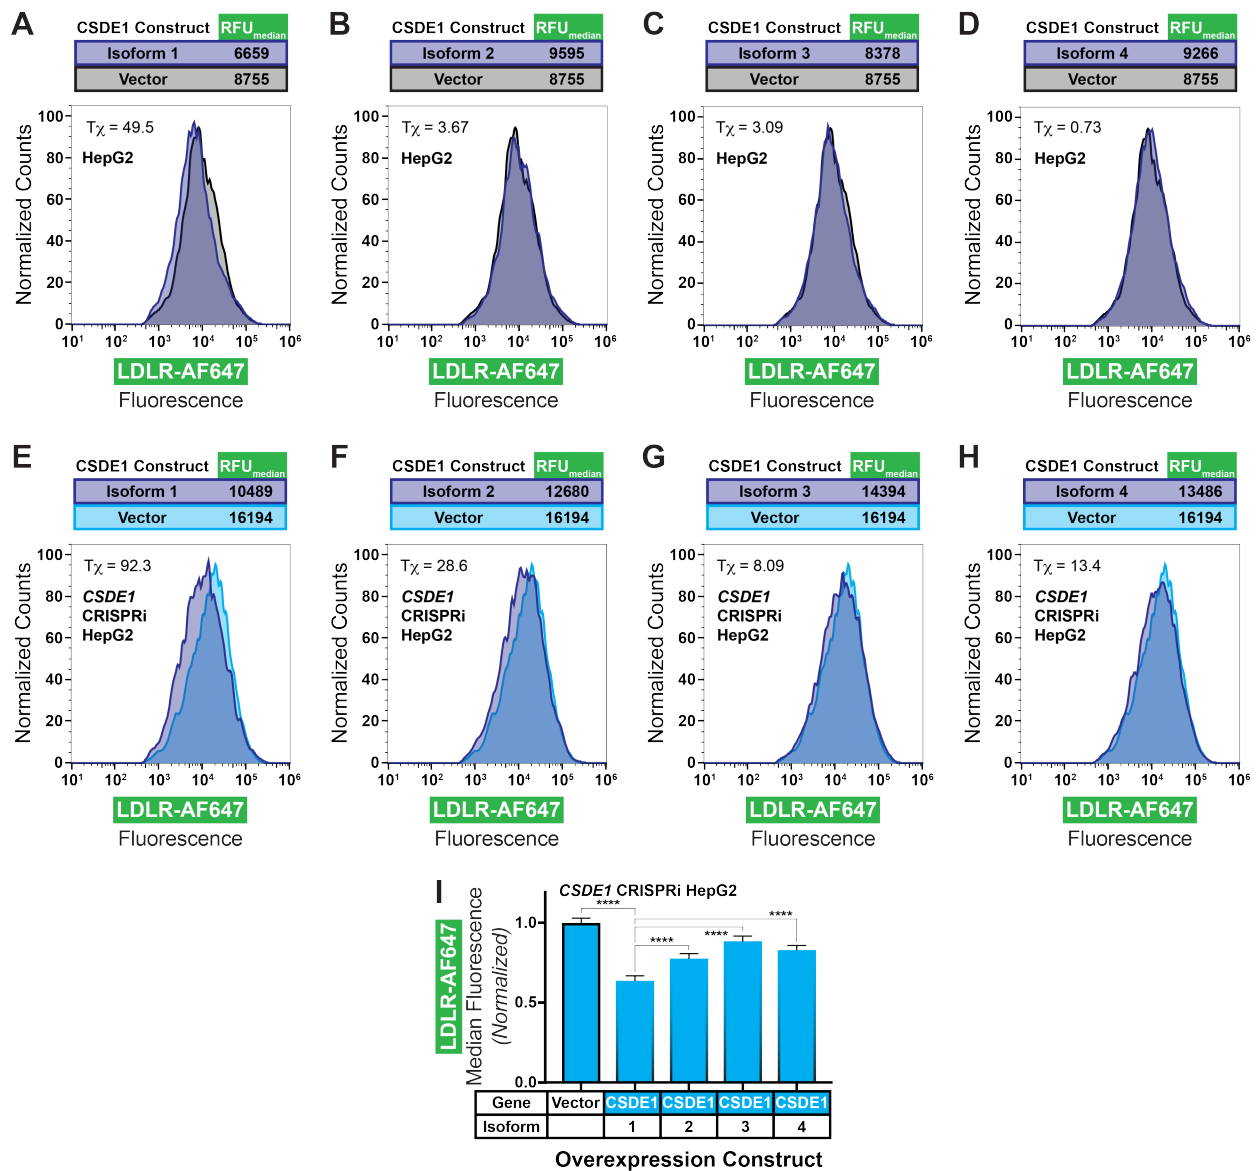

1554  
 1555  
 1556  
 1557  
 1558  
 1559  
 1560  
 1561  
 1562  
 1563  
 1564

**Supplementary Figure 6: Effect of CSDE1 Overexpression.** Flow cytometry histograms showing AF647 conjugated anti-LDLR antibody labelling (as proxy for LDLR abundance) of HepG2 cells (A-D) or engineered dCas9-KRAB HepG2 cells transduced with *CSDE1* targeting sgRNA (E-H) and transfected with an overexpression construct encoding the indicated *CSDE1* isoform or vector alone.  $T_\chi$  metric (FlowJo v10)(105–107) shown on graphs, and median fluorescence shown above. Quantified relative LDLR abundance of normalized median fluorescence of the data from e-h shown in i, with one-way ANOVA with Tukey’s multiple comparisons test. Error bars indicate 95% confidence intervals. \*\*\*\* = p < 0.0001.



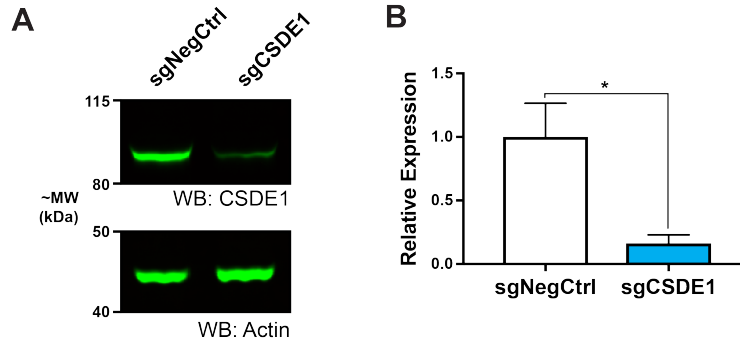

1565  
1566  
1567  
1568  
1569  
1570  
1571  
1572

**Supplementary Figure 7: CSDE1 Knockdown at Protein Level.** A) Representative immunoblots of lysates of dCas9-KRAB HepG2 cells harboring indicated guide RNA. CSDE1 shown above, and  $\beta$ -actin (loading control) shown below. B) Quantification of relative abundance of CSDE1 (normalized to loading control) shown in immunoblot in A. Data includes 3 independent experiments. \* indicates  $p < 0.05$  by Welch's T-test.

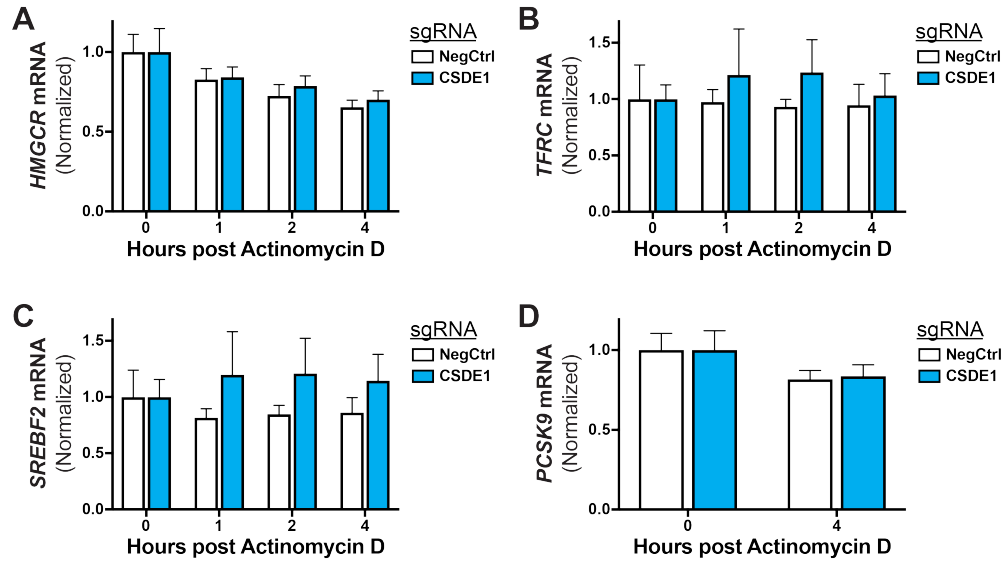

1573  
1574  
1575  
1576  
1577  
1578  
1579  
1580  
1581  
1582

**Supplementary Figure 8: Effect of CSDE1 Knockdown on Decay of Non-LDLR Transcripts.** Relative expression, by qPCR, of *HMGCR* (A), *TFRC* (B), *SREBF2* (C), or *PCSK9* (D) mRNA in dCas9-KRAB HepG2 cells transduced with indicated sgRNAs and subjected to arrest of transcription with actinomycin D. Data are normalized to results at T=0 within the sgRNA evaluated to illustrate the change in time. Data represent summary results from 3 independent experiments. Error bars = 95% confidence intervals. All pairwise comparisons (unpaired t-tests with Holm-Sidak correction) are nonsignificant.

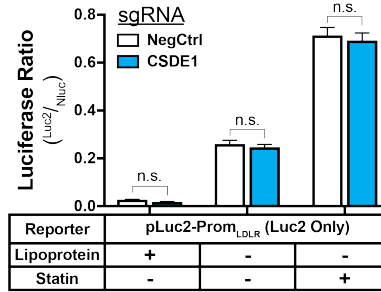

1583  
1584

1585 **Supplementary Figure 9: Physiologic Response of Luciferase Reporter System.** Relative  
1586 ratiometric luciferase activity of dCas9-KRAB HepG2 (CRISPRi) cells transiently transfected  
1587 with unmodified Luc2 construct under the *LDLR* promoter (pLuc2-Prom<sub>LDLR</sub>, Fig. 4E) and  
1588 secreted Nluc reporter under the CMV promoter and subjected to indicated media conditions.  
1589 Data represent summary results from 3 independent experiments. n.s. = non-significant. Two-  
1590 way ANOVA with Sidak's multiple comparisons test was used.  
1591

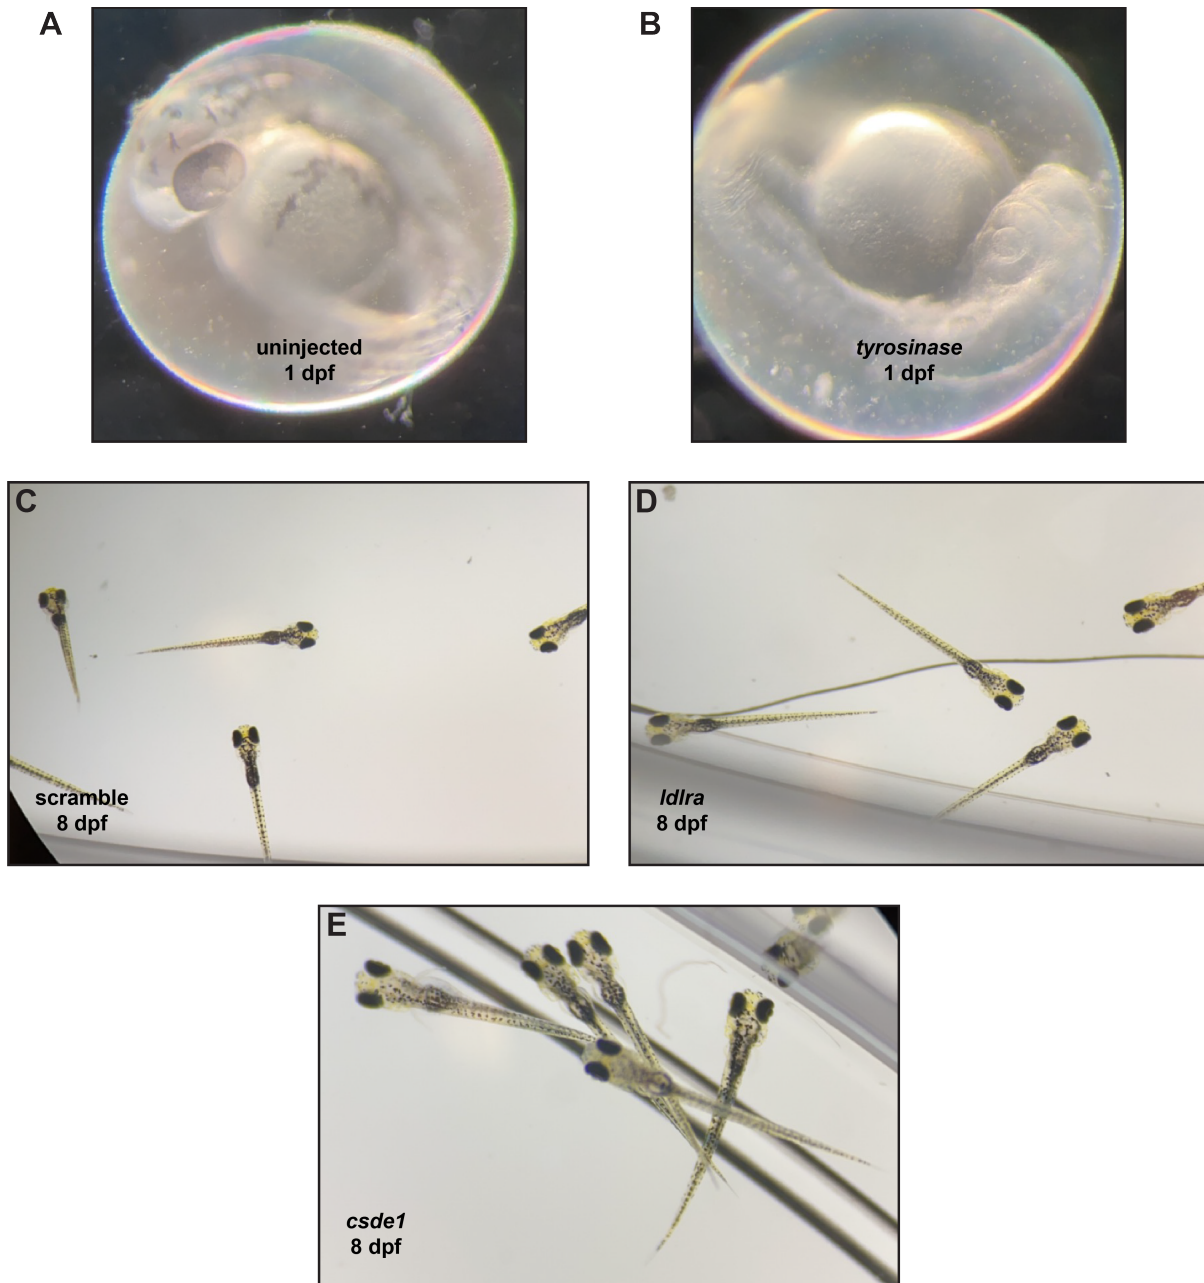

1592  
1593  
1594  
1595  
1596  
1597  
1598  
1599  
1600

**Supplementary Figure 10: Visual Phenotypes of Zebrafish Cas9-sgRNA Saturation Gene Disruption.** *A,B*) Representative microscopic images of zebrafish larvae at 1 day post fertilization without (*A*) or with (*B*) injected Cas9 and redundant guides against tyrosinase control performed concomitantly with each zebrafish experiment. Albinism is the readout for successful injections. *C-E*) Representative microscopic images of zebrafish larvae at 8 dpf and with injected Cas9 and guides against scramble controls (*C*), *ldlra* (*D*), and *csde1* (*E*).

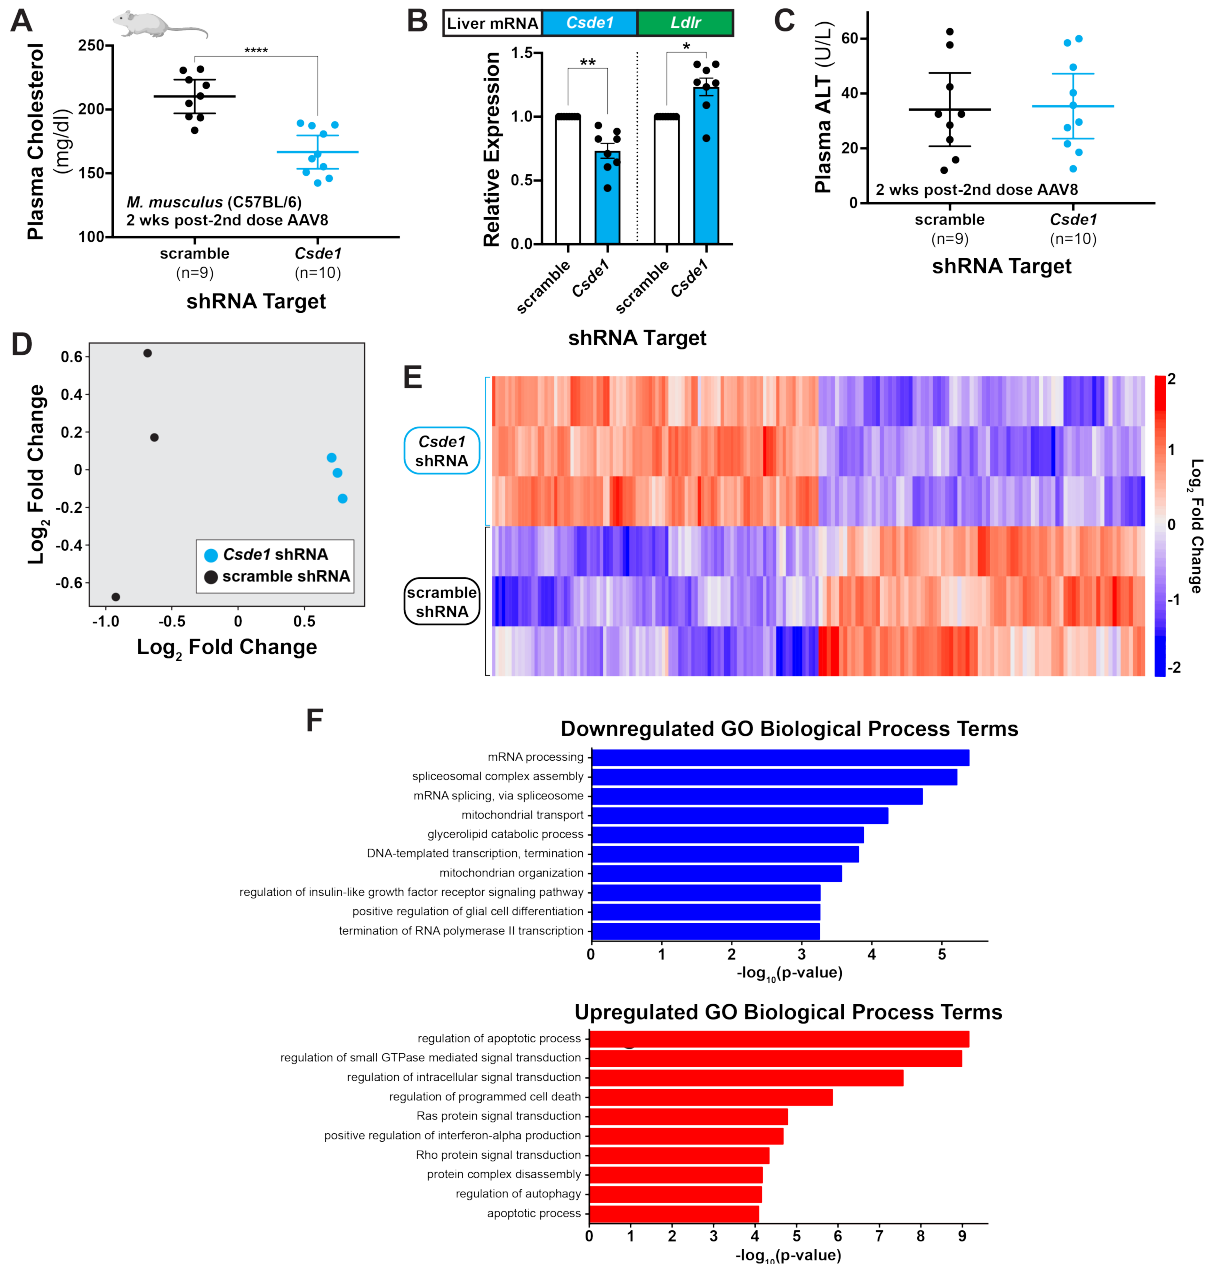

1601  
1602

1603 **Supplementary Figure 11: Effects of *in vivo* *Csde1* Disruption in Mice.** A) Total fasting  
1604 plasma cholesterol of C57BL/6 mice on an atherogenic diet, 2 weeks after transduction with  
1605 second dose of AAV8-packaged shRNA against indicated target (8 weeks after first dose).  
1606 Welch's t-test shown. B) Relative expression, by qPCR, of indicated mRNA targets from mouse  
1607 liver tissue from the indicated treatment arms. Expression normalized to *B2m* as the  
1608 housekeeping control. Welch's T-test shown. Error bars = standard error of the mean. C)  
1609 Plasma alanine aminotransferase activity (ALT) of mice from A. Welch's T-test revealed no  
1610 significant difference between intervention arms. D) Unsupervised cluster analysis of individual  
1611 mice analyzed for differential gene analysis. E) Heatmap of top 100 differentially expressed  
1612 genes (by p value) of the individual mice analyzed by RNA-seq. Mice transduced with AAV8-  
1613 scramble-shRNA at the bottom and those transduced with AAV8-*Csde1*-shRNA at the top. F)  
1614 Top 10 biological process GO terms (by uncorrected p value) identified from all statistically



1615 significant differentially expressed genes downregulated (blue) or upregulated (red) by *Csde1*  
1616 shRNA treatment. *All*) Each data point represents an individual mouse. \* =  $p < 0.05$ , \*\* =  $p <$   
1617  $0.01$ , and \*\*\*\* =  $p < 0.001$ . Error bars = 95% confidence intervals unless noted otherwise.  
1618

| Metric                          | Value              |
|---------------------------------|--------------------|
| Age (y)                         | 56.9 (7.9)         |
| Sex                             | 179,963 (46.1%)    |
| European ancestry               | 376,358 (96.4%)    |
| Cholesterol (mg/dl)             |                    |
| Total                           | 221.1 (44.3)       |
| HDL                             | 56.1 (14.8)        |
| LDL                             | 138.1 (33.7)       |
| Triglycerides (mg/dl)           | 132.6 [93.6-191.5] |
| Statin Rx                       | 64,004 (16.4%)     |
| BMI (kg/m <sup>2</sup> )        | 27.4 (4.8)         |
| Systolic blood pressure (mmHg)  | 140.2 (19.7)       |
| Diastolic blood pressure (mmHg) | 82.3 (10.7)        |
| Current smoker                  | 39,736 (10.2%)     |
| Diabetes mellitus type 2        | 25,349 (6.5%)      |
| Coronary artery disease         | 18,204 (4.8%)      |

1619  
1620  
1621  
1622  
1623  
1624  
1625

**Supplementary Table 7: Baseline Characteristics of UK Biobank Participants in Genomic Association Analyses.** Continuous values are presented as mean (standard deviation) except for triglycerides which is given as median (Q1-Q3) due to the skewness of the triglyceride distribution. Categorical data are presented as count (percentage). BMI = body-mass index; HDL = high-density lipoprotein; LDL = low-density lipoprotein.
